# Supplementary material for: RGB image-based drought stress classification of garden plants using SVM model
Source: Research Square preprint supplement (doi:10.21203/rs.3.rs-7052665/v1), 2025-07-27
Supplement: Supplementary file 1 [file 05897b076f5c6fcf7ab0a8fe.xlsx]

## Sheet: RGB image data
Polygonatum odoratum						Pachysandra terminalis						Hosta plantaginea						Carex maculata						Aster spathulifolius						Phedimus takesimensis						Iris sanguinea						Lilium lancifolium						Allium dumebuchum
Moisture	BGI	GLI	NGRDI			Moisture	BGI	GLI	NGRDI			Moisture	BGI	GLI	NGRDI			Moisture	BGI	GLI	NGRDI			Moisture	BGI	GLI	NGRDI			Moisture	BGI	GLI	NGRDI			Moisture	BGI	GLI	NGRDI			Moisture	BGI	GLI	NGRDI			Moisture	BGI
28.8271	0.645884	0.11057	0.0171541			28.8271	0.646443	0.112188	0.0154758			28.8271	0.630105	0.165192	0.100334			30.9958	0.655733	0.122802	0.041693			30.9958	0.757024	0.0770202	0.0220689			29.1396	0.694982	0.0829138	-0.00539524			30.9958	0.734361	0.0797378	0.0142814			30.9958	0.673187	0.0979622	0.00796162			30.9958	0.633113
28.8271	0.660409	0.123179	0.049422			28.8271	0.648973	0.136341	0.060307			28.8271	0.659365	0.184823	0.159077			30.9958	0.647562	0.116512	0.026289			30.9958	0.763834	0.076478	0.0248554			29.1396	0.699479	0.0896181	0.00872469			30.9958	0.710649	0.0938943	0.0251569			30.9958	0.671046	0.107814	0.022342			30.9958	0.619965
28.2979	0.672911	0.116785	0.0459583			28.2979	0.658903	0.129739	0.0550567			28.2979	0.68873	0.163726	0.139893			30.9958	0.66032	0.127351	0.0529192			30.9958	0.758309	0.080434	0.0289841			29.1396	0.680408	0.110704	0.038837			30.9958	0.727652	0.0877407	0.0238217			30.9958	0.661896	0.110823	0.0231227			30.9958	0.651973
28.2979	0.68391	0.105291	0.0321737			28.2979	0.665309	0.119005	0.0402844			28.2979	0.687515	0.157088	0.125747			30.9958	0.660111	0.12454	0.0485614			30.9958	0.736162	0.0959084	0.0444067			29.1396	0.677345	0.105203	0.0230303			30.9958	0.714721	0.0937477	0.0276374			30.9958	0.664843	0.112218	0.0273195			30.9958	0.657916
28.2979	0.694755	0.104259	0.0367138			28.2979	0.666993	0.122861	0.0484971			28.2979	0.680784	0.168106	0.142975			30.9958	0.680841	0.115212	0.0437962			30.9958	0.759459	0.0739221	0.0177124			29.1396	0.675916	0.108036	0.027923			30.9958	0.716893	0.0769137	0.000889011			30.9958	0.665951	0.0988087	0.004896			30.9958	0.669439
28.2979	0.693604	0.104458	0.0363446			28.2979	0.662268	0.122921	0.0459094			28.2979	0.683705	0.165444	0.139792			29.5646	0.682833	0.116703	0.0474792			29.5646	0.767245	0.0801979	0.0330363			30.6	0.699308	0.0906378	0.00958184			29.5646	0.732833	0.0767937	0.00855442			29.5646	0.664247	0.0997449	0.00899621			29.5646	0.657378
28.2979	0.698061	0.100687	0.0326001			28.2979	0.671517	0.118219	0.0443768			28.2979	0.71724	0.14731	0.127644			29.5646	0.676074	0.125301	0.0594286			29.5646	0.770056	0.0823347	0.0384634			30.6	0.702918	0.0947719	0.019909			29.5646	0.731588	0.0791997	0.0128953			29.5646	0.689368	0.0938907	0.0115168			29.5646	0.663275
29.2708	0.687923	0.104571	0.0341128			29.2708	0.667227	0.121965	0.0483113			29.2708	0.70991	0.149939	0.127578			29.5646	0.673984	0.125269	0.0582371			29.5646	0.768596	0.077803	0.0296086			30.6	0.716017	0.0846597	0.00738336			29.5646	0.737327	0.0788397	0.015204			29.5646	0.676507	0.10199	0.0182071			29.5646	0.671607
29.2708	0.694236	0.109821	0.0456716			29.2708	0.676238	0.125277	0.0582059			29.2708	0.696297	0.162983	0.143705			29.5646	0.668929	0.12457	0.0544863			29.5646	0.760922	0.0832872	0.0351704			30.6	0.699954	0.0928977	0.0147432			29.5646	0.738626	0.0808329	0.0199903			29.5646	0.677262	0.107198	0.0274059			29.5646	0.666686
29.2708	0.690267	0.0951809	0.0182035			29.2708	0.669407	0.110613	0.0287239			29.2708	0.692608	0.147249	0.11133			29.5646	0.677658	0.122482	0.0556496			29.5646	0.767246	0.0874468	0.0463232			30.6	0.708644	0.0834466	0.00286282			29.5646	0.720133	0.0832054	0.0138853			29.5646	0.677967	0.100625	0.0153122			29.5646	0.66816
29.2708	0.700313	0.0925035	0.0196228			29.2708	0.66847	0.115365	0.0379513			29.2708	0.697532	0.154566	0.128813			29.3542	0.670976	0.12963	0.0635265			29.3542	0.786699	0.0819655	0.0469933			32.4687	0.699291	0.0953855	0.0189213			29.3542	0.722337	0.086462	0.020067			29.3542	0.664614	0.111595	0.0256782			29.3542	0.639482
29.2708	0.685712	0.110003	0.0420166			29.2708	0.665413	0.127704	0.0565763			29.2708	0.692327	0.164636	0.144918			29.3542	0.644055	0.121421	0.032897			29.3542	0.78763	0.082261	0.0480812			32.4687	0.689566	0.0946122	0.0115489			29.3542	0.696871	0.0817633	-0.00133445			29.3542	0.639435	0.109154	0.00887415			29.3542	0.645966
30.5667	0.681369	0.106635	0.0329109			30.5667	0.662499	0.124244	0.0475418			30.5667	0.708071	0.149708	0.126084			29.3542	0.688404	0.113982	0.0464828			29.3542	0.786468	0.0826058	0.047959			32.4687	0.691756	0.0923605	0.00834184			29.3542	0.718179	0.0794966	0.0063747			29.3542	0.652072	0.107873	0.0127638			29.3542	0.676558
30.5667	0.692305	0.0907048	0.00980964			30.5667	0.685436	0.0977373	0.0139538			30.5667	0.697555	0.132084	0.0851354			29.3542	0.670638	0.107147	0.0244888			29.3542	0.779936	0.0902773	0.0584831			32.4687	0.704275	0.0920927	0.0143522			29.3542	0.724978	0.0833522	0.015831			29.3542	0.666517	0.108482	0.0220516			29.3542	0.669436
30.5667	0.709461	0.0916599	0.0231183			30.5667	0.677714	0.11742	0.0473386			30.5667	0.722692	0.146454	0.13006			29.3542	0.679801	0.115876	0.0450974			29.3542	0.788763	0.0914456	0.0657955			32.4687	0.70705	0.0937508	0.0195558			29.3542	0.727873	0.0802081	0.0120799			29.3542	0.662526	0.108386	0.0199559			29.3542	0.679472
30.5667	0.689471	0.0994163	0.0249425			30.5667	0.671743	0.11577	0.0390206			30.5667	0.711935	0.144091	0.117827			28.8271	0.678499	0.122698	0.0568469			28.8271	0.765151	0.0773159	0.0267046			30.4104	0.685302	0.107797	0.0332721			28.8271	0.726183	0.0870379	0.0227458			28.8271	0.687876	0.10321	0.0257226			28.8271	0.670667
30.5667	0.70379	0.0892083	0.0155126			30.5667	0.678641	0.107885	0.0304595			30.5667	0.712541	0.139314	0.109304			28.8271	0.683314	0.116772	0.0487541			28.8271	0.75854	0.0802038	0.0285353			30.4104	0.711808	0.0733671	-0.0145381			28.8271	0.731777	0.0775251	0.00959868			28.8271	0.682701	0.0996009	0.0171416			28.8271	0.670948
29.1396	0.707067	0.0945795	0.0260382			29.1396	0.68304	0.10912	0.0344529			29.1396	0.721552	0.139878	0.117005			28.8271	0.686899	0.118052	0.0532795			28.8271	0.755104	0.0839186	0.033366			30.4104	0.703516	0.0822936	-0.00272787			28.8271	0.73527	0.0754307	0.0083812			28.8271	0.680713	0.0981521	0.013508			28.8271	0.677094
29.1396	0.718011	0.0878	0.019627			29.1396	0.683703	0.112126	0.0402876			29.1396	0.726503	0.140528	0.121147			28.8271	0.686635	0.10596	0.0316707			28.8271	0.756848	0.0851001	0.0362963			30.4104	0.686071	0.0993032	0.0200438			28.8271	0.73634	0.0727568	0.0043169			28.8271	0.678203	0.0964992	0.0101919			28.8271	0.682282
29.1396	0.71989	0.0873411	0.0203489			29.1396	0.682321	0.111967	0.0403836			29.1396	0.723405	0.141332	0.1209			28.8271	0.690757	0.112301	0.0453184			28.8271	0.763417	0.0822272	0.0344626			30.4104	0.71695	0.0784738	-0.00239252			28.8271	0.733172	0.0785864	0.012744			28.8271	0.691428	0.0972679	0.018251			28.8271	0.684726
29.1396	0.718011	0.0856241	0.0156196			29.1396	0.682573	0.107279	0.031272			29.1396	0.725555	0.130682	0.101322			28.2979	0.681434	0.110438	0.0354979			28.2979	0.765794	0.0842549	0.0390504			32.5333	0.691029	0.0992255	0.0201703			28.2979	0.733868	0.0751697	0.00662456			28.2979	0.663557	0.111009	0.0248569			28.2979	0.660162
29.1396	0.719371	0.0866344	0.0183873			29.1396	0.684745	0.108082	0.0343561			29.1396	0.729536	0.132418	0.107633			28.2979	0.670763	0.110184	0.028846			28.2979	0.789205	0.0778188	0.0404072			32.5333	0.690943	0.103108	0.0287747			28.2979	0.716015	0.0814713	0.00754602			28.2979	0.657186	0.115382	0.0279582			28.2979	0.655061
30.6	0.691675	0.103756	0.0330156			30.6	0.646968	0.132469	0.0551533			30.6	0.700925	0.15659	0.134639			28.2979	0.663007	0.118882	0.0394736			28.2979	0.767334	0.0878573	0.0463867			32.5333	0.705574	0.090739	0.0136665			28.2979	0.723418	0.0764495	0.00316384			28.2979	0.67589	0.101771	0.016595			28.2979	0.666971
30.6	0.704136	0.0970836	0.0276342			30.6	0.679566	0.110238	0.0352056			30.6	0.730659	0.130997	0.105361			28.2979	0.665962	0.116441	0.0367244			28.2979	0.788898	0.0815229	0.0470028			32.5333	0.712537	0.0868657	0.0106189			28.2979	0.723536	0.0790088	0.00751601			28.2979	0.671364	0.105085	0.0191638			28.2979	0.661556
30.6	0.663167	0.106897	0.0231669			30.6	0.630198	0.133471	0.0442583			30.6	0.685318	0.16106	0.132805			28.2979	0.680814	0.112235	0.0387957			28.2979	0.768954	0.0829992	0.0386666			32.5333	0.710351	0.0821788	0.00127273			28.2979	0.713668	0.0798691	0.00398323			28.2979	0.657597	0.105565	0.012626			28.2979	0.68173
30.6	0.652318	0.108146	0.0171803			30.6	0.642457	0.122168	0.0300895			30.6	0.663814	0.159906	0.115441			29.2708	0.670098	0.119222	0.0447373			29.2708	0.781112	0.0794479	0.0386667			26.9646	0.685845	0.0989434	0.0173489			29.2708	0.728459	0.0788824	0.00976466			29.2708	0.650839	0.117564	0.0288619			29.2708	0.662551
30.6	0.677871	0.0860072	-0.00310529			30.6	0.66799	0.102531	0.0145057			30.6	0.697187	0.139811	0.101144			29.2708	0.677783	0.114652	0.0411575			29.2708	0.779901	0.0883576	0.0545125			26.9646	0.690419	0.0961579	0.0162129			29.2708	0.723178	0.0782925	0.00604795			29.2708	0.644066	0.118131	0.0265899			29.2708	0.666469
32.4687	0.689089	0.100295	0.0273317			32.4687	0.690541	0.111983	0.0433587			32.4687	0.717288	0.145037	0.124026			29.2708	0.644646	0.119932	0.0313617			29.2708	0.769146	0.0694997	0.0144149			26.9646	0.645877	0.116315	0.0251322			29.2708	0.720094	0.0792137	0.00625631			29.2708	0.652366	0.114178	0.0253635			29.2708	0.662704
32.4687	0.685892	0.0934562	0.0136949			32.4687	0.684125	0.102956	0.0241034			32.4687	0.722855	0.132769	0.104382			29.2708	0.659003	0.127603	0.0540009			29.2708	0.807663	0.0724012	0.0407561			26.9646	0.666872	0.102944	0.0130718			29.2708	0.713203	0.0899162	0.0206328			29.2708	0.64678	0.123283	0.0366795			29.2708	0.675215
32.4687	0.709216	0.097129	0.0326278			32.4687	0.687664	0.116571	0.0512245			32.4687	0.720755	0.152767	0.142509			29.2708	0.695559	0.1084	0.0408319			29.2708	0.796206	0.0814851	0.0513647			26.9646	0.682674	0.0936535	0.00733963			29.2708	0.731548	0.0744468	0.00384349			29.2708	0.67799	0.103232	0.0215282			29.2708	0.692148
32.4687	0.709196	0.100227	0.038213			32.4687	0.688538	0.123689	0.0649578			32.4687	0.718911	0.159589	0.154337			30.5667	0.691188	0.112318	0.0455913			30.5667	0.789149	0.0846509	0.0526933			26.1313	0.678561	0.115706	0.0416498			30.5667	0.712511	0.0790614	0.00327749			30.5667	0.654811	0.106694	0.0128713			30.5667	0.684102
32.4687	0.706964	0.105911	0.0467166			32.4687	0.698737	0.121022	0.0655744			32.4687	0.751153	0.141222	0.139577			30.5667	0.698936	0.110129	0.0461037			30.5667	0.795639	0.0717574	0.0328779			26.1313	0.702476	0.0982692	0.0245212			30.5667	0.73001	0.0729198	0.00141622			30.5667	0.662643	0.105261	0.0148913			30.5667	0.6971
30.4104	0.694537	0.0982123	0.0256979			30.4104	0.723952	0.0901919	0.0232108			30.4104	0.727844	0.137273	0.115952			30.5667	0.680856	0.116037	0.045543			30.5667	0.796706	0.0784795	0.0459803			26.1313	0.711533	0.0938172	0.0222354			30.5667	0.723832	0.0780553	0.00661512			30.5667	0.663415	0.109117	0.0214109			30.5667	0.67485
30.4104	0.696452	0.0977739	0.0258658			30.4104	0.719262	0.0941251	0.0274987			30.4104	0.725189	0.143079	0.125648			30.5667	0.68214	0.120587	0.054077			30.5667	0.796524	0.0787713	0.046092			26.1313	0.718074	0.100106	0.0371808			30.5667	0.713888	0.0895845	0.0214269			30.5667	0.664737	0.115688	0.0331461			30.5667	0.672101
30.4104	0.69433	0.0961038	0.0221279			30.4104	0.710672	0.0977185	0.0299283			30.4104	0.751046	0.124876	0.107366			30.5667	0.675991	0.116595	0.0441156			30.5667	0.796086	0.0781469	0.0446669			26.1313	0.72132	0.0882669	0.0191113			30.5667	0.713491	0.080512	0.00575396			30.5667	0.657375	0.110459	0.0200602			30.5667	0.682843
30.4104	0.68255	0.103136	0.0269955			30.4104	0.714975	0.093107	0.0232535			30.4104	0.730192	0.132777	0.108771			29.1396	0.685522	0.122164	0.0588303			29.1396	0.777451	0.0744862	0.0276148			26.1313	0.713462	0.0996758	0.0345609			29.1396	0.724477	0.0774149	0.00573798			29.1396	0.660685	0.107584	0.0174856			29.1396	0.667355
30.4104	0.687396	0.0943302	0.0149888			30.4104	0.720273	0.0842287	0.0109306			30.4104	0.721706	0.131743	0.101377			29.1396	0.690738	0.115411	0.0500334			29.1396	0.778184	0.0768424	0.0320639			21.475	0.689353	0.0896824	0.00925433			29.1396	0.724884	0.0809527	0.0117719			29.1396	0.660884	0.112022	0.0247426			29.1396	0.673795
32.5333	0.656339	0.117565	0.0358268			32.5333	0.687894	0.1103	0.0369979			32.5333	0.715572	0.146723	0.125943			29.1396	0.688576	0.107204	0.0343371			29.1396	0.807636	0.0716756	0.0392254			21.475	0.692436	0.0920642	0.0149553			29.1396	0.717558	0.0770546	0.00100821			29.1396	0.656751	0.104905	0.0102637			29.1396	0.661058
32.5333	0.674636	0.106803	0.0285072			32.5333	0.694529	0.104022	0.0302944			32.5333	0.727397	0.134505	0.110667			29.1396	0.688394	0.115559	0.0488012			29.1396	0.798317	0.0737745	0.0378478			21.475	0.694329	0.0852871	0.00414995			29.1396	0.73154	0.0798837	0.0140467			29.1396	0.66951	0.108489	0.0238682			29.1396	0.676583
32.5333	0.66939	0.103189	0.0197937			32.5333	0.689831	0.0989232	0.0187956			32.5333	0.717937	0.13306	0.101456			29.1396	0.684421	0.108211	0.0340023			29.1396	0.792483	0.0663339	0.0209491			21.475	0.693164	0.0864168	0.00571683			29.1396	0.723625	0.0842298	0.0170017			29.1396	0.670036	0.109037	0.0248651			29.1396	0.672231
32.5333	0.669182	0.107609	0.0272394			32.5333	0.69736	0.101096	0.0267756			32.5333	0.718273	0.13826	0.111899			30.6	0.688641	0.113063	0.0446785			30.6	0.779663	0.0734098	0.0274779			21.475	0.674302	0.106797	0.0296538			30.6	0.725559	0.0838085	0.0168991			30.6	0.66389	0.112066	0.0258201			30.6	0.665435
26.9646	0.692192	0.118355	0.0585056			26.9646	0.706317	0.121374	0.0692074			26.9646	0.782281	0.0940638	0.0673526			30.6	0.680457	0.116405	0.0459892			30.6	0.755758	0.080315	0.0270139			15.3042	0.682728	0.0886063	0.00431645			30.6	0.741988	0.0808137	0.0208995			30.6	0.673135	0.112511	0.0329721			30.6	0.662918
26.9646	0.691313	0.115688	0.052876			26.9646	0.713999	0.114442	0.0612465			26.9646	0.790132	0.0890331	0.0613799			30.6	0.707636	0.108516	0.0478181			30.6	0.74809	0.0829868	0.0276124			15.3042	0.693047	0.0890649	0.00995361			30.6	0.741173	0.0703817	0.00241442			30.6	0.673606	0.0977531	0.00785537			30.6	0.692482
26.9646	0.697239	0.111344	0.0484347			26.9646	0.714829	0.111429	0.0559246			26.9646	0.791862	0.0869328	0.0584504			30.6	0.686911	0.111527	0.0413508			30.6	0.768625	0.07688	0.0278912			15.3042	0.701636	0.080229	-0.000820296			30.6	0.739452	0.0769263	0.0130001			30.6	0.676777	0.102871	0.0188624			30.6	0.670565
29.0604	0.692143	0.121653	0.0648677			29.0604	0.702343	0.124754	0.0732164			29.0604	0.75659	0.101222	0.0656076			30.6	0.707323	0.1081	0.0469078			30.6	0.767468	0.075718	0.0250876			15.3042	0.694838	0.0818005	-0.00140059			30.6	0.733926	0.0802649	0.0155943			30.6	0.666413	0.109859	0.0242757			30.6	0.686677
29.0604	0.704364	0.112842	0.0558234			29.0604	0.716018	0.118079	0.0700365			29.0604	0.782377	0.0909158	0.061124			32.4687	0.690495	0.108261	0.0380713			32.4687	0.76187	0.0785102	0.0264276			15.3042	0.686498	0.0818987	-0.00600931			32.4687	0.729205	0.075301	0.00519007			32.4687	0.645836	0.11584	0.0235949			32.4687	0.680493
29.0604	0.703712	0.117346	0.0636925			29.0604	0.703746	0.129226	0.0827457			29.0604	0.789585	0.0910949	0.0657016			32.4687	0.692451	0.108654	0.0394491			32.4687	0.775111	0.0794138	0.0350968			11.0917	0.680133	0.0837755	-0.00588817			32.4687	0.73203	0.0733519	0.00305564			32.4687	0.648448	0.111855	0.0179784			32.4687	0.67383
29.0604	0.68263	0.120437	0.056262			29.0604	0.703108	0.12087	0.0661761			29.0604	0.784395	0.0889083	0.0578412			32.4687	0.669903	0.113619	0.0359724			32.4687	0.768582	0.0746879	0.0235343			11.0917	0.695523	0.0798991	-0.0050692			32.4687	0.729193	0.077545	0.00893762			32.4687	0.645729	0.116575	0.0246125			32.4687	0.701386
29.0604	0.693997	0.127308	0.0760715			29.0604	0.715168	0.127205	0.0867425			29.0604	0.801164	0.0923117	0.0747263			32.4687	0.667423	0.116586	0.0401194			32.4687	0.77153	0.0814744	0.0373767			11.0917	0.670349	0.09685	0.00969725			32.4687	0.733092	0.0774112	0.0105085			32.4687	0.648965	0.116389	0.0260902			32.4687	0.675114
26.6604	0.714389	0.124042	0.0825091			26.6604	0.728928	0.123954	0.0893555			26.6604	0.787633	0.0981462	0.0778195			32.4687	0.721295	0.0989467	0.0396622			32.4687	0.786735	0.080638	0.0441112			11.0917	0.706844	0.0773757	-0.00385236			32.4687	0.731202	0.0750932	0.00571914			32.4687	0.653335	0.114834	0.0262914			32.4687	0.719642
26.6604	0.702108	0.11116	0.051265			26.6604	0.717458	0.113579	0.06219			26.6604	0.783318	0.0855721	0.0513583			30.4104	0.71473	0.113557	0.0616046			30.4104	0.77869	0.0766803	0.0325157			11.0917	0.69511	0.0861336	0.00549149			30.4104	0.72717	0.0838034	0.0174821			30.4104	0.658588	0.115868	0.032447			30.4104	0.701663
26.6604	0.700621	0.113605	0.0549259			26.6604	0.713567	0.117751	0.0675884			26.6604	0.786254	0.0849593	0.052148			30.4104	0.697849	0.109418	0.0438491			30.4104	0.797765	0.0764594	0.0425768			8.5875	0.675477	0.0854811	-0.00515078			30.4104	0.741742	0.0850997	0.0276525			30.4104	0.674723	0.117331	0.0430677			30.4104	0.672156
26.6604	0.692877	0.114979	0.0526156			26.6604	0.716001	0.113423	0.0610407			26.6604	0.78898	0.083486	0.0504823			30.4104	0.700507	0.109656	0.0461254			30.4104	0.785832	0.0814785	0.0451021			8.5875	0.67206	0.0900537	-0.000259072			30.4104	0.75125	0.0805804	0.0261933			30.4104	0.663071	0.124277	0.0483574			30.4104	0.692838
26.6604	0.698961	0.116034	0.0581965			26.6604	0.716813	0.113885	0.0623804			26.6604	0.789348	0.0884951	0.0602139			30.4104	0.696789	0.110342	0.0454057			30.4104	0.795325	0.0739228	0.0363261			8.5875	0.674237	0.0898015	7.96762e-05			30.4104	0.750862	0.0792069	0.0241878			30.4104	0.655056	0.128756	0.0512859			30.4104	0.681594
29.1187	0.703005	0.114645	0.058133			29.1187	0.713696	0.115038	0.0622386			29.1187	0.776438	0.0876084	0.051595			30.4104	0.69746	0.105727	0.0373384			30.4104	0.793575	0.0753687	0.0381014			8.5875	0.676293	0.0850495	-0.00629039			30.4104	0.751586	0.0810243	0.0271697			30.4104	0.666348	0.122925	0.0488627			30.4104	0.689188
29.1187	0.709023	0.109159	0.0517511			29.1187	0.710343	0.120993	0.0718224			29.1187	0.787332	0.0859797	0.0550583			32.5333	0.710986	0.106781	0.0474149			32.5333	0.777712	0.083957	0.044557			8.5875	0.699985	0.0642872	-0.0277602			32.5333	0.728273	0.09229	0.0329282			32.5333	0.671287	0.120127	0.0456288			32.5333	0.704508
29.1187	0.711375	0.109572	0.0538452			29.1187	0.712945	0.12003	0.0715559			29.1187	0.793366	0.0830359	0.0529961			32.5333	0.691357	0.112793	0.0467042			32.5333	0.791492	0.0766616	0.0391113			7.4	0.682494	0.0610631	-0.0393735			32.5333	0.723866	0.0942812	0.0335534			32.5333	0.687047	0.112698	0.0401862			32.5333	0.678425
29.1187	0.69527	0.122752	0.0675503			29.1187	0.709925	0.126391	0.0808232			29.1187	0.791821	0.0906721	0.0661603			32.5333	0.68274	0.114516	0.045228			32.5333	0.78787	0.0796316	0.0425867			7.4	0.702418	0.0695191	-0.0177615			32.5333	0.740675	0.0756044	0.0104923			32.5333	0.685137	0.102189	0.0215629			32.5333	0.683835
29.1187	0.704019	0.110749	0.0515296			29.1187	0.71548	0.114231	0.0626977			29.1187	0.796359	0.0747489	0.0384985			32.5333	0.687435	0.111414	0.0424782			32.5333	0.796105	0.0816625	0.0511828			7.4	0.721551	0.0599107	-0.025745			32.5333	0.747523	0.0747908	0.0134037			32.5333	0.691412	0.100299	0.0227051			32.5333	0.691435
28.7438	0.689794	0.117253	0.0546874			28.7438	0.70708	0.116659	0.0607227			28.7438	0.776734	0.0861891	0.0491517			32.5333	0.688647	0.116651	0.0524265			32.5333	0.756153	0.0837251	0.0335652			7.4	0.707674	0.0627435	-0.0267199			32.5333	0.742291	0.0771662	0.0153318			32.5333	0.697268	0.0979402	0.0226345			32.5333	0.683854
28.7438	0.709121	0.108676	0.0508153			28.7438	0.719362	0.113728	0.0636495			28.7438	0.787103	0.0823561	0.0481969			26.9646	0.69886	0.107407	0.0410479			26.9646	0.807752	0.0700682	0.0364135			7.4	0.709121	0.0521868	-0.044379			26.9646	0.745743	0.0813365	0.0229428			26.9646	0.684893	0.109404	0.0359841			26.9646	0.679466
28.7438	0.703866	0.119013	0.0663325			28.7438	0.719431	0.120897	0.0769212			28.7438	0.790044	0.0882196	0.0606004			26.9646	0.701028	0.108837	0.0445975			26.9646	0.804273	0.071707	0.0374382			6.66667	0.706495	0.0379907	-0.0665644			26.9646	0.743935	0.0816796	0.0228405			26.9646	0.694227	0.105095	0.0326208			26.9646	0.682331
28.7438	0.71465	0.10979	0.0560856			28.7438	0.723125	0.11439	0.0670581			28.7438	0.794497	0.0825233	0.0522982			26.9646	0.685623	0.118116	0.0518103			26.9646	0.802901	0.0703637	0.0342409			6.66667	0.741809	0.0345565	-0.0576374			26.9646	0.776276	0.0695733	0.0193893			26.9646	0.696793	0.108416	0.0403443			26.9646	0.66852
28.7438	0.712603	0.109026	0.0534706			28.7438	0.722781	0.111656	0.0618055			28.7438	0.795588	0.0825232	0.0532103			26.9646	0.695045	0.111447	0.0453744			26.9646	0.77427	0.0790116	0.0342433			6.66667	0.747299	0.0204294	-0.0779988			26.9646	0.775334	0.0689771	0.0179445			26.9646	0.692041	0.10934	0.0390747			26.9646	0.675269
25.325	0.73323	0.104714	0.0577001			25.325	0.714161	0.120282	0.0721921			25.325	0.785109	0.0873303	0.0559695			26.9646	0.670344	0.117651	0.0418316			26.9646	0.793845	0.0816649	0.0498713			6.66667	0.721862	0.0448847	-0.0494605			26.9646	0.753983	0.082528	0.0305404			26.9646	0.700878	0.109461	0.0441861			26.9646	0.653892
25.325	0.715529	0.106415	0.0510159			25.325	0.70515	0.124885	0.0760531			25.325	0.789289	0.0863533	0.0569516			29.0604	0.687986	0.104726	0.0293489			29.0604	0.790575	0.0778352	0.0409525			6.66667	0.721316	0.0452202	-0.0490565			29.0604	0.744556	0.0863868	0.0307373			29.0604	0.691926	0.106142	0.0346309			29.0604	0.662149
25.325	0.711835	0.115481	0.0654445			25.325	0.71123	0.127324	0.0843889			25.325	0.785711	0.0936198	0.0685217			29.0604	0.665268	0.118156	0.0398115			29.0604	0.778774	0.0653452	0.0118735			6.14167	0.723925	0.0304502	-0.0706842			29.0604	0.756408	0.084956	0.0353472			29.0604	0.688396	0.112829	0.0438855			29.0604	0.652527
25.325	0.707689	0.105656	0.0451424			25.325	0.712653	0.113623	0.0598739			25.325	0.78598	0.0818434	0.0454614			29.0604	0.682465	0.114997	0.0442931			29.0604	0.807957	0.0730975	0.0418062			6.14167	0.717161	0.027744	-0.0770912			29.0604	0.757139	0.0762648	0.0203298			29.0604	0.722225	0.0877151	0.0178352			29.0604	0.659103
25.325	0.703593	0.102884	0.0378068			25.325	0.716683	0.104443	0.0450509			25.325	0.7878	0.0763581	0.0366247			29.0604	0.684842	0.102304	0.0238097			29.0604	0.798995	0.0720111	0.0351238			6.14167	0.710931	0.0323942	-0.072786			29.0604	0.764396	0.0712785	0.0154131			29.0604	0.715502	0.0882266	0.0151974			29.0604	0.661444
25.2937	0.709541	0.110309	0.0544768			25.2937	0.719775	0.111227	0.0596512			25.2937	0.783334	0.0798358	0.0405451			29.0604	0.694338	0.101317	0.027734			29.0604	0.807546	0.0705956	0.0373266			6.14167	0.73063	0.033187	-0.0634936			29.0604	0.748348	0.0835961	0.028556			29.0604	0.721251	0.0907586	0.0226393			29.0604	0.677756
25.2937	0.720637	0.106019	0.0534367			25.2937	0.716107	0.12094	0.0763792			25.2937	0.787641	0.0862372	0.0557508			26.6604	0.678274	0.117585	0.0473693			26.6604	0.8118	0.0636258	0.0263469			6.14167	0.713283	0.0312382	-0.0735121			26.6604	0.751367	0.0724343	0.0111184			26.6604	0.712675	0.0845633	0.0077435			26.6604	0.657311
25.2937	0.701267	0.117055	0.0616174			25.2937	0.710025	0.122104	0.0735818			25.2937	0.780627	0.0909921	0.0601417			26.6604	0.686213	0.121021	0.0582625			26.6604	0.808089	0.0678839	0.0321441			6.2	0.7171	0.0259052	-0.0803708			26.6604	0.749601	0.0759797	0.0163552			26.6604	0.707372	0.0904306	0.0146604			26.6604	0.670265
25.2937	0.698899	0.116249	0.0588486			25.2937	0.713716	0.116798	0.0664514			25.2937	0.790662	0.0832531	0.0511075			26.6604	0.689745	0.11331	0.0465849			26.6604	0.812182	0.0733021	0.0445752			6.2	0.71673	0.0209724	-0.0884186			26.6604	0.752814	0.0723639	0.0117247			26.6604	0.707564	0.0879729	0.0104763			26.6604	0.677267
25.2937	0.69754	0.119327	0.0634609			25.2937	0.714478	0.119104	0.0707677			25.2937	0.789044	0.0830036	0.0496795			26.6604	0.70155	0.114735	0.0559632			26.6604	0.809512	0.0643593	0.0262728			6.2	0.716566	0.0317795	-0.0717011			26.6604	0.744133	0.0749981	0.0116375			26.6604	0.701362	0.0894429	0.00960908			26.6604	0.698578
26.1313	0.699103	0.111823	0.051101			26.1313	0.676474	0.136542	0.0778368			26.1313	0.758175	0.0949603	0.0559781			26.6604	0.684857	0.118806	0.0539319			26.6604	0.810423	0.0642395	0.0267137			6.2	0.716749	0.0305146	-0.0730197			26.6604	0.734555	0.0849431	0.023499			26.6604	0.703895	0.0944043	0.0189425			26.6604	0.680368
26.1313	0.710748	0.10224	0.0407306			26.1313	0.684439	0.13448	0.0805633			26.1313	0.783038	0.0857513	0.0532122			29.1187	0.693361	0.11015	0.0423488			29.1187	0.802351	0.0697335	0.032395			6.2	0.722116	0.0262159	-0.0781981			29.1187	0.742915	0.0833205	0.0248323			29.1187	0.713156	0.0944205	0.0237113			29.1187	0.670099
26.1313	0.71152	0.105548	0.0469485			26.1313	0.680913	0.139388	0.087091			26.1313	0.791096	0.0853078	0.0566389			29.1187	0.694582	0.109825	0.0427287			29.1187	0.81552	0.0622269	0.0257956			6.14792	0.713894	0.0202399	-0.0895574			29.1187	0.74505	0.0784793	0.0178635			29.1187	0.709283	0.0905375	0.0154151			29.1187	0.676949
26.1313	0.691064	0.109675	0.0414048			26.1313	0.694692	0.125947	0.0701954			26.1313	0.790425	0.0797559	0.0449178			29.1187	0.723457	0.0959299	0.034068			29.1187	0.819627	0.0582028	0.0205378			6.14792	0.719772	0.0203693	-0.0864073			29.1187	0.756043	0.0770275	0.0206884			29.1187	0.708074	0.0950784	0.0226638			29.1187	0.711847
26.1313	0.697883	0.102529	0.0323801			26.1313	0.695692	0.117753	0.0559328			26.1313	0.798936	0.0749509	0.0412126			29.1187	0.676661	0.119206	0.0482311			29.1187	0.818291	0.0572307	0.0179618			6.14792	0.726854	0.0183994	-0.0880768			29.1187	0.753857	0.0750341	0.0167106			29.1187	0.703497	0.0943835	0.0187448			29.1187	0.660411
21.475	0.621095	0.136203	0.0503983			21.475	0.685551	0.0937172	0.0144999			21.475	0.705555	0.0828985	0.00298505			29.1187	0.679893	0.111432	0.0364222			29.1187	0.821098	0.0664144	0.0366081			6.14792	0.748583	0.00606477	-0.0997378			29.1187	0.74048	0.077987	0.0150431			29.1187	0.694585	0.098198	0.0206406			29.1187	0.663402
21.475	0.620966	0.123353	0.0269798			21.475	0.679902	0.0834295	-0.00703701			21.475	0.690765	0.0799706	-0.0108959			28.7438	0.680397	0.108069	0.03097			28.7438	0.813632	0.06955	0.0384107			6.14792	0.71638	0.0176043	-0.092727			28.7438	0.743242	0.0767445	0.013885			28.7438	0.70812	0.0907415	0.013935			28.7438	0.660498
21.475	0.64096	0.115912	0.0248557			21.475	0.699595	0.0820337	0.00058905			21.475	0.707007	0.0729269	-0.0143106			28.7438	0.686149	0.12024	0.0556269			28.7438	0.812125	0.068017	0.034687			6.12708	0.710729	0.0175267	-0.0949851			28.7438	0.740388	0.0774477	0.0131776			28.7438	0.680518	0.105079	0.0238514			28.7438	0.66794
21.475	0.633854	0.131605	0.0490586			21.475	0.697544	0.0929015	0.0171422			21.475	0.726666	0.0732677	-0.00341495			28.7438	0.686634	0.103057	0.0259111			28.7438	0.813806	0.0710608	0.0413645			6.12708	0.728135	0.0194295	-0.0864182			28.7438	0.746688	0.0805426	0.0223947			28.7438	0.701936	0.100381	0.0275513			28.7438	0.662439
21.475	0.635984	0.127655	0.0421759			21.475	0.69992	0.0889801	0.0118344			21.475	0.721009	0.0734129	-0.00634921			28.7438	0.702442	0.10036	0.0304813			28.7438	0.814527	0.069774	0.039364			6.12708	0.739463	0.0166795	-0.0853811			28.7438	0.753898	0.0778908	0.0220178			28.7438	0.693334	0.109797	0.0391313			28.7438	0.683515
15.3042	0.622467	0.138264	0.0550505			15.3042	0.685874	0.0956858	0.0171459			15.3042	0.716433	0.0801398	0.00406059			28.7438	0.707531	0.100077	0.033155			28.7438	0.820264	0.0669306	0.037149			6.12708	0.728147	0.0055354	-0.107354			28.7438	0.754123	0.0785233	0.0237265			28.7438	0.696023	0.109131	0.0400149			28.7438	0.689749
15.3042	0.618971	0.137567	0.0510415			15.3042	0.683815	0.0919873	0.00889375			15.3042	0.710322	0.0823329	0.00393835			25.325	0.699651	0.111211	0.0475921			25.325	0.801485	0.0700332	0.0325648			6.12708	0.758146	-0.00952543	-0.120179			25.325	0.734802	0.0961243	0.0426708			25.325	0.6804	0.11964	0.0493616			25.325	0.67458
15.3042	0.651408	0.117	0.0341742			15.3042	0.701149	0.0868288	0.00956446			15.3042	0.710733	0.0777005	-0.00389201			25.325	0.700024	0.103006	0.0336623			25.325	0.81207	0.0677282	0.0342522			5.9875	0.740349	-0.000849042	-0.111854			25.325	0.732584	0.0893754	0.0293955			25.325	0.698528	0.10316	0.0293727			25.325	0.658712
15.3042	0.642198	0.116449	0.0279191			15.3042	0.705587	0.0812678	0.00200648			15.3042	0.723085	0.0667835	-0.016333			25.325	0.703225	0.103469	0.0360794			25.325	0.805469	0.0696164	0.0343143			5.9875	0.73497	0.0102773	-0.0975444			25.325	0.753906	0.0813904	0.0275995			25.325	0.678046	0.118478	0.0452104			25.325	0.683191
15.3042	0.647416	0.116772	0.0319921			15.3042	0.705772	0.0800937	0.000344208			15.3042	0.727914	0.0671327	-0.0132327			25.325	0.690812	0.11255	0.0450197			25.325	0.810191	0.0678315	0.033587			5.9875	0.728266	0.015188	-0.0915343			25.325	0.738298	0.0889714	0.0320527			25.325	0.699167	0.104493	0.0327289			25.325	0.655695
11.0917	0.621802	0.138291	0.054654			11.0917	0.682081	0.095615	0.0152291			11.0917	0.715433	0.0787064	0.00097677			25.325	0.684843	0.11387	0.043465			25.325	0.807642	0.0672705	0.0314431			5.9875	0.723449	0.0243448	-0.0792212			25.325	0.74829	0.0896302	0.0390454			25.325	0.7046	0.105715	0.0379795			25.325	0.664759
11.0917	0.610055	0.149422	0.0667993			11.0917	0.679027	0.104133	0.0279899			11.0917	0.70415	0.0903785	0.0130921			25.2937	0.688004	0.105742	0.0322012			25.2937	0.7944	0.0732695	0.0347874			5.9875	0.719056	0.00383933	-0.111872			25.2937	0.72636	0.0932718	0.0324986			25.2937	0.682317	0.111806	0.036005			25.2937	0.659809
11.0917	0.631893	0.127548	0.0416077			11.0917	0.684448	0.092757	0.0102455			11.0917	0.714842	0.0731922	-0.0101199			25.2937	0.704604	0.110415	0.0497755			25.2937	0.806482	0.0747127	0.0440879			5.69583	0.722908	0.0110943	-0.097958			25.2937	0.754791	0.0807625	0.0267955			25.2937	0.708289	0.0999351	0.0304656			25.2937	0.675731
11.0917	0.628866	0.127786	0.0399549			11.0917	0.693264	0.0892469	0.00884652			11.0917	0.721408	0.0687962	-0.0145668			25.2937	0.674275	0.115738	0.04153			25.2937	0.806066	0.0693176	0.0340941			5.69583	0.726423	0.00857815	-0.101934			26.1313	0.728707	0.0935217	0.0355752			26.1313	0.663795	0.119314	0.0395699			25.2937	0.674972
11.0917	0.629768	0.127203	0.0393496			11.0917	0.690422	0.0850123	-1.46847e-05			11.0917	0.729106	0.0633833	-0.0195556			25.2937	0.691018	0.112147	0.0454181			25.2937	0.817333	0.0682222	0.0383296			5.69583	0.726782	-0.00243953	-0.119055			26.1313	0.744634	0.0928005	0.0432995			26.1313	0.669716	0.122878	0.0494771			25.2937	0.679116
8.5875	0.642554	0.128644	0.0513581			8.5875	0.708743	0.0736586	-0.00772478			8.5875	0.711379	0.0801784	0.000614782			25.2937	0.702009	0.113055	0.0528117			25.2937	0.813988	0.0690613	0.0381408			5.69583	0.720906	0.00919914	-0.102874			26.1313	0.750794	0.0889231	0.0403437			26.1313	0.670155	0.121267	0.0461018			25.2937	0.683508
8.5875	0.609921	0.137368	0.0458745			8.5875	0.678292	0.0889801	0.000648512			8.5875	0.710115	0.0725966	-0.0139631			26.1313	0.723586	0.112511	0.0664812			26.1313	0.782153	0.0833989	0.0469177			5.69583	0.706192	0.0219091	-0.0872826			26.1313	0.74733	0.085725	0.0320389			26.1313	0.682428	0.10737	0.0285634			26.1313	0.70363
8.5875	0.638722	0.125762	0.0430668			8.5875	0.686387	0.0917708	0.0099733			8.5875	0.715254	0.0740131	-0.00880284			26.1313	0.719237	0.105725	0.0514626			26.1313	0.792173	0.07835	0.0430387			5.28125	0.70587	0.00754731	-0.108895			26.1313	0.745661	0.0826221	0.026038			26.1313	0.677963	0.105348	0.0237913			26.1313	0.708343
8.5875	0.642487	0.120418	0.0362292			8.5875	0.712775	0.0710693	-0.0116373			8.5875	0.721686	0.0654239	-0.0199545			26.1313	0.718352	0.105016	0.0493866			26.1313	0.800266	0.0734321	0.0387978			5.28125	0.728644	-0.0128858	-0.134705			21.475	0.682657	0.0838565	-0.00789027			21.475	0.744206	0.0658282	-0.00392062			26.1313	0.71771
8.5875	0.652493	0.120332	0.0423201			8.5875	0.712778	0.0733428	-0.00727539			8.5875	0.724547	0.0685266	-0.0131676			26.1313	0.71802	0.102134	0.0431428			26.1313	0.796182	0.0789968	0.0469165			5.28125	0.722708	-0.00466414	-0.123324			21.475	0.690633	0.0786774	-0.0115383			21.475	0.745762	0.0672058	-0.000161488			26.1313	0.704623
7.4	0.639041	0.114547	0.0252177			7.4	0.678773	0.0768048	-0.0168543			7.4	0.693687	0.0750246	-0.0171004			26.1313	0.692251	0.111169	0.0444269			26.1313	0.794816	0.0741898	0.0371842			5.28125	0.739388	-0.0103377	-0.1261			21.475	0.681443	0.0736427	-0.0246839			21.475	0.742063	0.0618253	-0.0108587			26.1313	0.686841
7.4	0.659166	0.12078	0.0460856			7.4	0.727947	0.0554967	-0.0288372			7.4	0.71352	0.0720048	-0.0129103			21.475	0.673186	0.0960415	0.00865694			21.475	0.659085	0.0751989	-0.0274694			5.28125	0.732443	-0.0063703	-0.121661			21.475	0.706856	0.0649648	-0.026412			21.475	0.756225	0.0557354	-0.0148384			21.475	0.637554
7.4	0.708549	0.0907679	0.0213126			7.4	0.753723	0.0408158	-0.0409239			7.4	0.724839	0.0658224	-0.0180022			21.475	0.6592	0.110378	0.0249533			21.475	0.628647	0.0986852	-0.00686454			4.9625	0.70884	0.00481857	-0.114361			21.475	0.694941	0.0725507	-0.0200626			21.475	0.755589	0.0576443	-0.0116308			21.475	0.612856
7.4	0.679085	0.116763	0.0503298			7.4	0.752464	0.0526972	-0.0224373			7.4	0.731625	0.0713703	-0.0057045			21.475	0.653929	0.109307	0.0198708			21.475	0.644307	0.0846544	-0.0213323			4.9625	0.717573	0.00391598	-0.1115			15.3042	0.706508	0.0704798	-0.0172609			15.3042	0.747974	0.0572603	-0.0158164			21.475	0.621912
7.4	0.685018	0.104653	0.0334533			7.4	0.746949	0.0457667	-0.0359143			7.4	0.736305	0.0612008	-0.0209055			21.475	0.651825	0.110591	0.0210777			21.475	0.679409	0.0591331	-0.0443829			4.9625	0.72148	0.0143943	-0.0946111			15.3042	0.70935	0.0677749	-0.0202323			15.3042	0.75929	0.0531586	-0.0172599			21.475	0.625196
6.66667	0.698309	0.0876728	0.0103884			6.66667	0.738103	0.0402788	-0.0487265			6.66667	0.71845	0.0594698	-0.0315942			21.475	0.650515	0.110897	0.0207811			21.475	0.681475	0.0693152	-0.0273452			4.9625	0.716866	0.0176717	-0.0909011			15.3042	0.701489	0.0599257	-0.0368366			15.3042	0.75209	0.0506822	-0.0250162			21.475	0.619859
6.66667	0.699679	0.104687	0.0410453			6.66667	0.746181	0.0564945	-0.0183282			6.66667	0.735308	0.0702362	-0.00468854			15.3042	0.657499	0.109198	0.0219053			15.3042	0.657477	0.082852	-0.0161463			4.9625	0.723572	-0.00621076	-0.125292			15.3042	0.713678	0.0539574	-0.0409476			15.3042	0.756691	0.0469859	-0.029185			15.3042	0.617606
6.66667	0.698496	0.0957041	0.0242655			6.66667	0.74736	0.0497327	-0.0292772			6.66667	0.738192	0.058763	-0.0235169			15.3042	0.649261	0.113958	0.0246063			15.3042	0.69631	0.0584858	-0.0376097			4.78333	0.713264	0.00976925	-0.101081			15.3042	0.719102	0.0635476	-0.0228074			15.3042	0.767629	0.0505576	-0.0179485			15.3042	0.60933
6.66667	0.700721	0.0969906	0.0281227			6.66667	0.746747	0.0528376	-0.0243737			6.66667	0.738781	0.0632783	-0.0147457			15.3042	0.642202	0.121897	0.0346207			15.3042	0.689907	0.0626833	-0.0341359			4.78333	0.713394	0.00781358	-0.107895			11.0917	0.714116	0.0601833	-0.0312683			11.0917	0.754727	0.0483832	-0.0276182			15.3042	0.60322
6.66667	0.692508	0.0866146	0.00539549			6.66667	0.73516	0.0428733	-0.0464758			6.66667	0.732264	0.0517088	-0.0382661			15.3042	0.655003	0.1047	0.0128616			15.3042	0.69154	0.0600862	-0.0378274			4.78333	0.716264	-0.00364496	-0.122763			11.0917	0.711254	0.0594048	-0.0340715			11.0917	0.76375	0.0441154	-0.0306441			15.3042	0.620801
6.14167	0.638425	0.0898193	-0.0161789			6.14167	0.665311	0.0643484	-0.0416265			6.14167	0.623572	0.0828181	-0.0379277			15.3042	0.655037	0.107623	0.0178071			15.3042	0.691306	0.0513388	-0.0514506			4.78333	0.705836	-0.00556969	-0.129063			11.0917	0.704907	0.0583571	-0.0381776			11.0917	0.760764	0.0460624	-0.0285911			15.3042	0.610912
6.14167	0.649614	0.0857105	-0.0173273			6.14167	0.681858	0.0580789	-0.0439943			6.14167	0.619578	0.0849082	-0.03714			11.0917	0.652474	0.106557	0.0145367			11.0917	0.656663	0.075851	-0.0272587			4.78333	0.724512	-0.0219131	-0.14832			11.0917	0.724034	0.0571297	-0.0312527			11.0917	0.766837	0.0463069	-0.025075			11.0917	0.615289
6.14167	0.64157	0.0994243	0.00088471			6.14167	0.681691	0.0692948	-0.0252438			6.14167	0.635718	0.0869337	-0.0250979			11.0917	0.664608	0.103455	0.0156701			11.0917	0.703663	0.046511	-0.0531142			4.55	0.714639	0.00594061	-0.108175			11.0917	0.719232	0.0551849	-0.0367986			11.0917	0.774297	0.0401168	-0.0329152			11.0917	0.617528
6.14167	0.64889	0.0998717	0.00531394			6.14167	0.683861	0.0709976	-0.0225471			6.14167	0.642161	0.0849652	-0.024954			11.0917	0.66838	0.0998087	0.0119958			11.0917	0.66847	0.0654998	-0.0394256			4.55	0.719573	-0.00747599	-0.129647			8.5875	0.724865	0.0513028	-0.0402948			8.5875	0.76427	0.0352813	-0.0441496			11.0917	0.628089
6.14167	0.650552	0.0947997	-0.00220361			6.14167	0.684744	0.0669367	-0.028594			6.14167	0.638908	0.0812284	-0.0328566			11.0917	0.66397	0.104776	0.0179194			11.0917	0.688543	0.0624498	-0.0354637			4.55	0.729278	0.016311	-0.0873541			8.5875	0.722856	0.0506279	-0.042818			8.5875	0.770649	0.0333093	-0.044756			11.0917	0.630521
6.2	0.663017	0.092707	0.00248155			6.2	0.694211	0.0662365	-0.026858			6.2	0.663143	0.0760053	-0.0305408			11.0917	0.665399	0.111458	0.0306057			11.0917	0.672807	0.0648095	-0.0380952			4.55	0.721348	0.0140343	-0.0947901			8.5875	0.716177	0.0472475	-0.0507719			8.5875	0.765605	0.0354698	-0.0433886			11.0917	0.629898
6.2	0.670213	0.0889716	-5.857e-05			6.2	0.704649	0.0603019	-0.0319969			6.2	0.667057	0.0730942	-0.0334239			8.5875	0.666581	0.0972895	0.00692917			8.5875	0.674572	0.0489595	-0.0598544			4.55	0.709225	0.00877483	-0.105737			8.5875	0.722497	0.0530206	-0.0386011			8.5875	0.764216	0.0456326	-0.0272465			8.5875	0.621741
6.2	0.666151	0.100082	0.015762			6.2	0.707313	0.0689907	-0.0162079			6.2	0.671376	0.0832876	-0.0144625			8.5875	0.671839	0.0861773	-0.00876635			8.5875	0.701314	0.0483191	-0.0517301			4.2375	0.712138	-0.00846217	-0.131732			8.5875	0.736489	0.0345698	-0.0620737			8.5875	0.775103	0.0305641	-0.049126			8.5875	0.626563
6.2	0.671047	0.0983155	0.0156655			6.2	0.706812	0.072306	-0.0106077			6.2	0.675093	0.0826798	-0.0135915			8.5875	0.672598	0.0921062	0.00177796			8.5875	0.689667	0.0540126	-0.0477542			4.2375	0.712597	0.00375666	-0.112436			7.4	0.742973	0.0460835	-0.0399447			7.4	0.752101	0.0463254	-0.0323018			8.5875	0.637713
6.2	0.66984	0.0886252	-0.00155973			6.2	0.711866	0.0610561	-0.0271542			6.2	0.675448	0.0744438	-0.0269666			8.5875	0.672692	0.0945696	0.00613386			8.5875	0.688299	0.0559672	-0.0454571			4.2375	0.717671	0.00266936	-0.113321			7.4	0.736282	0.0352482	-0.0609023			7.4	0.730127	0.0376219	-0.0537135			8.5875	0.643219
6.14792	0.674832	0.0922092	0.00764791			6.14792	0.713887	0.0652852	-0.0198609			6.14792	0.678687	0.0785263	-0.0190259			8.5875	0.667445	0.0941464	0.0027106			8.5875	0.676871	0.0468404	-0.0631424			4.2375	0.716481	0.00495025	-0.110043			7.4	0.754279	0.0321876	-0.0584964			7.4	0.772851	0.0345586	-0.0422069			8.5875	0.635131
6.14792	0.673263	0.0934996	0.00892152			6.14792	0.715992	0.0618201	-0.0253551			6.14792	0.67794	0.0793774	-0.0186883			7.4	0.687646	0.0797134	-0.010878			7.4	0.663205	0.0438852	-0.0692004			4.2375	0.735871	-0.00383571	-0.116821			7.4	0.760802	0.0248069	-0.0670624			7.4	0.785399	0.0257546	-0.0517359			7.4	0.634208
6.14792	0.686693	0.0912053	0.0118315			6.14792	0.725264	0.0624525	-0.0193505			6.14792	0.688418	0.0781088	-0.0150074			7.4	0.692316	0.078363	-0.0102431			7.4	0.678041	0.0373044	-0.0753248			4.01875	0.724633	-0.00982173	-0.129308			7.4	0.747746	0.0427593	-0.0432229			7.4	0.777836	0.0389719	-0.0321019			7.4	0.639745
6.14792	0.678327	0.0794293	-0.0117318			6.14792	0.721484	0.0476038	-0.0460246			6.14792	0.682031	0.0661456	-0.0378072			7.4	0.68828	0.0733759	-0.0201827			7.4	0.679592	0.0521098	-0.0539276			4.01875	0.719685	0.00396255	-0.108897			6.66667	0.754354	0.0356599	-0.053754			6.66667	0.773565	0.0274534	-0.0542758			7.4	0.649747
6.14792	0.680605	0.0766695	-0.0154987			6.14792	0.727178	0.044471	-0.0484959			6.14792	0.686304	0.062127	-0.0422248			7.4	0.677274	0.0775193	-0.0187749			7.4	0.689269	0.0462227	-0.0584799			4.01875	0.731674	-0.0140616	-0.13364			6.66667	0.761353	0.0317281	-0.0564448			6.66667	0.778862	0.0245655	-0.0563083			7.4	0.651832
6.12708	0.69691	0.0964385	0.0265221			6.12708	0.732554	0.0767481	0.0100983			6.12708	0.708012	0.0807959	-0.000851359			7.4	0.696847	0.075795	-0.0124606			7.4	0.700121	0.0407186	-0.0627904			4.01875	0.714625	-0.0110221	-0.13465			6.66667	0.769067	0.0306404	-0.0539389			6.66667	0.776981	0.0255398	-0.0558492			7.4	0.655501
6.12708	0.677526	0.0841243	-0.00436194			6.12708	0.706808	0.0633524	-0.0256493			6.12708	0.691699	0.0666138	-0.0329193			6.66667	0.699318	0.0605752	-0.0354606			6.66667	0.704219	0.0379214	-0.065737			4.01875	0.702295	-0.00904445	-0.133725			6.66667	0.765425	0.0261918	-0.0629568			6.66667	0.772652	0.0288374	-0.0522751			6.66667	0.662442
6.12708	0.6867	0.0826387	-0.00212392			6.12708	0.725274	0.0575152	-0.0272704			6.12708	0.706058	0.063446	-0.030907			6.66667	0.711722	0.0774677	-0.00120346			6.66667	0.703586	0.0380106	-0.0664005			3.87292	0.730997	-0.0286463	-0.155963			6.66667	0.767119	0.0293537	-0.05663			6.66667	0.769576	0.0293775	-0.0527943			6.66667	0.677009
6.12708	0.69117	0.0857854	0.0047635			6.12708	0.738729	0.0531766	-0.0292158			6.12708	0.71077	0.0663033	-0.0237717			6.66667	0.706428	0.0788502	-0.00135167			6.66667	0.710488	0.026594	-0.0809898			3.87292	0.722592	-0.000599968	-0.116167			6.14167	0.727408	0.0257253	-0.0811495			6.14167	0.733564	0.026047	-0.0720315			6.66667	0.676891
6.12708	0.701808	0.0812116	0.00261238			6.12708	0.744523	0.0492229	-0.0330366			6.12708	0.726103	0.0593611	-0.027818			6.66667	0.709897	0.0589776	-0.0331625			6.66667	0.674026	0.0500548	-0.0593157			3.87292	0.718726	-0.00133733	-0.118498			6.14167	0.73633	0.0228288	-0.0814567			6.14167	0.740229	0.0242341	-0.0727643			6.66667	0.677549
5.9875	0.687185	0.0780487	-0.00988731			5.9875	0.722005	0.0600955	-0.0245126			5.9875	0.703702	0.0622058	-0.0340822			6.66667	0.697108	0.0737617	-0.0147049			6.66667	0.620215	0.0505852	-0.080379			3.87292	0.732159	-0.0110999	-0.129598			6.14167	0.737353	0.0314036	-0.0672382			6.14167	0.734941	0.0343335	-0.0586465			6.66667	0.662285
5.9875	0.683159	0.0799641	-0.00922643			5.9875	0.729458	0.0562437	-0.0288083			5.9875	0.698721	0.0635162	-0.0352357			6.14167	0.753177	0.057409	-0.0163111			6.14167	0.66723	0.0348869	-0.0854727			3.87292	0.729111	-0.0118785	-0.13194			6.14167	0.741225	0.0317443	-0.0645566			6.14167	0.736861	0.0374	-0.0529919			6.14167	0.705885
5.9875	0.697586	0.0728202	-0.0132883			5.9875	0.740037	0.0484094	-0.0361661			5.9875	0.724458	0.0535144	-0.0380322			6.14167	0.723015	0.0617398	-0.0233446			6.14167	0.673857	0.0452322	-0.0674101									6.14167	0.736801	0.0370741	-0.057816			6.14167	0.730007	0.0395294	-0.0525439			6.14167	0.678091
5.9875	0.687913	0.0807504	-0.00556536			5.9875	0.736869	0.0505511	-0.0351808			5.9875	0.716244	0.058903	-0.034182			6.14167	0.713306	0.0654738	-0.0215486			6.14167	0.668995	0.0484569	-0.0644133									6.2	0.734492	0.0234136	-0.0808149			6.2	0.736828	0.0214163	-0.0783119			6.14167	0.666481
5.9875	0.705206	0.0728106	-0.00973092			5.9875	0.753537	0.0386205	-0.0468376			5.9875	0.751683	0.0432909	-0.0419963			6.14167	0.737733	0.0644947	-0.0117051			6.14167	0.667139	0.0325324	-0.0887602									6.2	0.729611	0.024845	-0.0811221			6.2	0.735542	0.0219398	-0.0783324			6.14167	0.69157
5.69583	0.685684	0.0842127	-0.000874431			5.69583	0.725491	0.0618691	-0.0196782			5.69583	0.713118	0.0629633	-0.0285788			6.14167	0.714423	0.0649376	-0.02219			6.14167	0.680762	0.0392998	-0.0724691									6.2	0.739568	0.0208015	-0.083171			6.2	0.738251	0.0218527	-0.0773064			6.14167	0.671751
5.69583	0.715771	0.0772203	0.0025746			5.69583	0.729525	0.0632263	-0.014644			5.69583	0.738313	0.0553538	-0.0278235			6.2	0.702522	0.0639191	-0.028479			6.2	0.654393	0.0489405	-0.0681816									6.2	0.735907	0.0203333	-0.0858583			6.2	0.734766	0.0215846	-0.0790298			6.2	0.662844
5.69583	0.678805	0.0829021	-0.00707786			5.69583	0.720445	0.056461	-0.0319045			5.69583	0.729055	0.0508254	-0.0411766			6.2	0.703247	0.057013	-0.0391756			6.2	0.6778	0.0377571	-0.0756945									6.2	0.747869	0.0163505	-0.086879			6.2	0.737441	0.019106	-0.0824097			6.2	0.658471
5.69583	0.679256	0.0837298	-0.00530794			5.69583	0.736053	0.0508472	-0.0344663			5.69583	0.736947	0.0481995	-0.0419894			6.2	0.699241	0.0740783	-0.0137224			6.2	0.67612	0.0383971	-0.0757503									6.14792	0.753156	0.0187171	-0.0807779			6.14792	0.739319	0.0219764	-0.0770754			6.2	0.660912
5.69583	0.67759	0.0856434	-0.00291298			5.69583	0.7387	0.0464024	-0.0408533			5.69583	0.746961	0.0449495	-0.0419945			6.2	0.704137	0.0604683	-0.033101			6.2	0.685604	0.0346343	-0.0776688									6.14792	0.750471	0.0344321	-0.0555653			6.14792	0.729483	0.0447418	-0.0437799			6.2	0.665921
5.28125	0.627844	0.10107	-0.00323135			5.28125	0.692235	0.0797197	-0.00803252			5.28125	0.70379	0.0689546	-0.0250559			6.2	0.701619	0.061579	-0.0326839			6.2	0.666725	0.0431809	-0.0716775									6.14792	0.759007	0.0311703	-0.0577144			6.14792	0.739427	0.0386328	-0.0500828			6.2	0.664779
5.28125	0.630289	0.090936	-0.0185473			5.28125	0.691298	0.0724773	-0.0200524			5.28125	0.702908	0.0609331	-0.0378335			6.14792	0.710786	0.0617534	-0.0280023			6.14792	0.665842	0.0443334	-0.0699285									6.14792	0.753883	0.0269162	-0.0671258			6.14792	0.746003	0.030534	-0.0608238			6.14792	0.675724
5.28125	0.653774	0.082369	-0.0205527			5.28125	0.706334	0.0670133	-0.0217762			5.28125	0.717832	0.0576197	-0.0356403			6.14792	0.707818	0.0537402	-0.0426122			6.14792	0.677714	0.0425304	-0.068758									6.14792	0.754816	0.0265134	-0.0677588			6.14792	0.739007	0.0312604	-0.0627161			6.14792	0.674476
5.28125	0.651185	0.0931153	-0.00424933			5.28125	0.717025	0.0705432	-0.0108766			5.28125	0.726693	0.0608132	-0.0259324			6.14792	0.728398	0.0500042	-0.039808			6.14792	0.6776	0.0523677	-0.0536935									6.12708	0.758956	0.0204807	-0.075109			6.12708	0.736579	0.0280374	-0.0689497			6.14792	0.69311
5.28125	0.678637	0.069465	-0.0292269			5.28125	0.739344	0.0469413	-0.0396196			5.28125	0.741292	0.0465818	-0.0417806			6.14792	0.720999	0.0652037	-0.0184477			6.14792	0.670249	0.0534369	-0.0555374									6.12708	0.764363	0.0207903	-0.0726042			6.12708	0.739516	0.0276404	-0.0685819			6.14792	0.679119
4.9625	0.619068	0.0781649	-0.0434763			4.9625	0.683839	0.0692649	-0.0305932			4.9625	0.699495	0.0650653	-0.0327587			6.14792	0.700071	0.069109	-0.0216894			6.14792	0.682634	0.0297702	-0.0859215									6.12708	0.772299	0.0167652	-0.0757584			6.12708	0.753112	0.0223157	-0.0719853			6.14792	0.660307
4.9625	0.620274	0.0595102	-0.071728			4.9625	0.672755	0.0537423	-0.0603026			4.9625	0.708212	0.0454923	-0.0604832			6.12708	0.71007	0.0620731	-0.0279005			6.12708	0.659988	0.0534371	-0.0591663									6.12708	0.771891	0.025008	-0.0614394			6.12708	0.74461	0.0351946	-0.0541085			6.12708	0.675727
4.9625	0.631582	0.0771356	-0.0395764			4.9625	0.676007	0.0737113	-0.026249			4.9625	0.718564	0.0612213	-0.0299112			6.12708	0.706821	0.0562417	-0.0382132			6.12708	0.67346	0.0448516	-0.067538									6.12708	0.775922	0.00862248	-0.0875188			6.12708	0.762458	0.0134698	-0.0827694			6.12708	0.669607
4.9625	0.641318	0.0738354	-0.040252			4.9625	0.701176	0.0637595	-0.0307043			4.9625	0.733297	0.0538178	-0.0344483			6.12708	0.747887	0.0396465	-0.0465032			6.12708	0.669078	0.0340568	-0.0849809									5.9875	0.757923	0.0298472	-0.0601789			5.9875	0.733979	0.0387268	-0.0527249			6.12708	0.719855
4.9625	0.658512	0.0649437	-0.0463741			4.9625	0.720501	0.0537725	-0.0379103			4.9625	0.739787	0.0527186	-0.0324402			6.12708	0.730003	0.0456384	-0.0450207			6.12708	0.666348	0.048171	-0.0650934									5.9875	0.763422	0.0184218	-0.0768027			5.9875	0.736928	0.0261842	-0.0722166			6.12708	0.697081
4.78333	0.65638	0.040274	-0.0845293			4.78333	0.68065	0.043218	-0.0716876			4.78333	0.710009	0.0565819	-0.0406973			6.12708	0.721471	0.0539603	-0.035179			6.12708	0.67299	0.0333306	-0.0829778									5.9875	0.770143	0.0128222	-0.082851			5.9875	0.743269	0.021992	-0.0763998			6.12708	0.688539
4.78333	0.648513	0.0574623	-0.0614324			4.78333	0.661988	0.0634581	-0.0496297			4.78333	0.745435	0.0531213	-0.0297384			5.9875	0.701223	0.0561281	-0.0408939			5.9875	0.670981	0.0365139	-0.0798737									5.9875	0.769129	0.018249	-0.0746326			5.9875	0.74951	0.0262869	-0.0676503			5.9875	0.669115
4.78333	0.654137	0.0543681	-0.0638252			4.78333	0.67056	0.0605098	-0.0498345			4.78333	0.724842	0.058938	-0.0299925			5.9875	0.709823	0.0542106	-0.0399301			5.9875	0.688448	0.0305958	-0.0828399									5.9875	0.768785	0.00854791	-0.0897127			5.9875	0.766497	0.0110277	-0.0855538			5.9875	0.679404
4.78333	0.689662	0.0309686	-0.0856231			4.78333	0.718268	0.0294879	-0.0777054			4.78333	0.742964	0.0418211	-0.0491741			5.9875	0.722126	0.0500823	-0.0405934			5.9875	0.67788	0.0381112	-0.0759959									5.69583	0.754787	0.0142432	-0.0876885			5.69583	0.745568	0.0111324	-0.0924487			5.9875	0.688007
4.78333	0.69258	0.0324183	-0.0819864			4.78333	0.719369	0.0342056	-0.0701565			4.78333	0.752902	0.0379682	-0.0503644			5.9875	0.705252	0.0631393	-0.0275459			5.9875	0.636823	0.0481192	-0.0765072									5.69583	0.771031	0.00673139	-0.0934248			5.69583	0.764602	0.00779091	-0.0904474			5.9875	0.680154
4.55	0.66963	0.031927	-0.0921889			4.55	0.669184	0.0428657	-0.0774392			4.55	0.707674	0.0542627	-0.0458124			5.9875	0.710205	0.0552687	-0.0389811			5.9875	0.654686	0.0419912	-0.0755613									5.69583	0.763894	0.0169707	-0.0781788			5.69583	0.743828	0.0216823	-0.076853			5.9875	0.672348
4.55	0.681181	0.0388994	-0.077312			4.55	0.679597	0.0494822	-0.0636536			4.55	0.721489	0.0567628	-0.0350309			5.69583	0.721764	0.0509452	-0.0395908			5.69583	0.66187	0.0379798	-0.0800722									5.69583	0.769105	0.0220062	-0.0679089			5.69583	0.759027	0.0255758	-0.0645879			5.69583	0.690395
4.55	0.704006	0.0361494	-0.0720359			4.55	0.707213	0.042797	-0.0609853			4.55	0.728084	0.058072	-0.0291116			5.69583	0.740154	0.0444097	-0.0413934			5.69583	0.663375	0.0425883	-0.0732683									5.69583	0.766935	0.0184828	-0.0751814			5.69583	0.776512	0.0141385	-0.076347			5.69583	0.704524
4.55	0.703785	0.0250054	-0.0898489			4.55	0.715042	0.0288534	-0.0800846			4.55	0.732174	0.0428921	-0.0526313			5.69583	0.736163	0.0417924	-0.0469481			5.69583	0.67976	0.0386948	-0.074249									5.28125	0.755706	0.0185759	-0.0803176			5.28125	0.75407	0.0141502	-0.084212			5.69583	0.706597
4.55	0.694562	0.0279437	-0.0894228			4.55	0.71448	0.0336405	-0.0738029			4.55	0.741079	0.0380745	-0.0562043			5.69583	0.716659	0.0629285	-0.0218285			5.69583	0.654014	0.0401633	-0.0801906									5.28125	0.748583	0.0206744	-0.0801305			5.28125	0.747974	0.0168781	-0.0824585			5.69583	0.687055
4.2375	0.681502	0.0331368	-0.0874777			4.2375	0.68205	0.041506	-0.0746544			4.2375	0.710109	0.0533429	-0.0469835			5.69583	0.718086	0.0676919	-0.0135819			5.69583	0.670388	0.02896	-0.0901968									5.28125	0.752697	0.0192082	-0.0802983			5.28125	0.74941	0.0169366	-0.081889			5.69583	0.692336
4.2375	0.684787	0.0286806	-0.0927443			4.2375	0.678745	0.0406653	-0.0778335			4.2375	0.709717	0.0499752	-0.0525303			5.28125	0.71905	0.0503903	-0.041166			5.28125	0.667107	0.0436381	-0.0701221									5.28125	0.76937	0.0218924	-0.0678132			5.28125	0.767464	0.0218384	-0.0665335			5.28125	0.699184
4.2375	0.688902	0.0341485	-0.0828829			4.2375	0.692295	0.0444886	-0.0662046			4.2375	0.726207	0.0469866	-0.0494166			5.28125	0.728813	0.0613046	-0.0183968			5.28125	0.684934	0.0395671	-0.0704511									5.28125	0.76701	0.0280369	-0.0589211			5.28125	0.783011	0.0216993	-0.0607644			5.28125	0.702095
4.2375	0.712009	0.0229149	-0.0897748			4.2375	0.724269	0.0277068	-0.0780045			4.2375	0.744854	0.0332962	-0.0626699			5.28125	0.739166	0.0362285	-0.054631			5.28125	0.666105	0.0394823	-0.0770271									4.9625	0.757185	0.0213802	-0.0742293			4.9625	0.752139	0.0187821	-0.0772761			5.28125	0.711125
4.2375	0.701238	0.0403031	-0.068064			4.2375	0.721728	0.0499024	-0.0453005			4.2375	0.743879	0.0498455	-0.0356665			5.28125	0.734607	0.0368986	-0.0555509			5.28125	0.688015	0.03446	-0.0753007									4.9625	0.753436	0.0211845	-0.0763109			4.9625	0.754486	0.0193426	-0.0755877			5.28125	0.71153
4.01875	0.705609	0.0241791	-0.0908026			4.01875	0.70275	0.0350812	-0.0761982			4.01875	0.732317	0.038879	-0.0597072			5.28125	0.727006	0.0388681	-0.0565635			5.28125	0.68217	0.0292966	-0.0848026									4.9625	0.758894	0.0131355	-0.0872568			4.9625	0.772394	0.00561617	-0.0911446			5.28125	0.699814
4.01875	0.750205	0.024525	-0.0714474			4.01875	0.740916	0.0357057	-0.0559721			4.01875	0.765398	0.0440666	-0.0340717			4.9625	0.728632	0.0361325	-0.0589672			4.9625	0.687001	0.0294579	-0.0844671									4.9625	0.760618	0.0125334	-0.0876982			4.9625	0.772483	0.00519142	-0.0921728			4.9625	0.7107
4.01875	0.712192	0.0338022	-0.0723543			4.01875	0.707374	0.0460887	-0.0561257			4.01875	0.739544	0.0437406	-0.0480415			4.9625	0.739936	0.0455977	-0.038944			4.9625	0.680807	0.0358133	-0.0778236									4.9625	0.761979	0.0123526	-0.0865924			4.9625	0.779373	0.00619276	-0.0878778			4.9625	0.718618
4.01875	0.695742	0.045872	-0.060983			4.01875	0.718222	0.0547424	-0.0378726			4.01875	0.741639	0.0486193	-0.0389569			4.9625	0.737899	0.0320769	-0.0619107			4.9625	0.660338	0.0433798	-0.0738353									4.78333	0.754454	0.0123765	-0.0889977			4.78333	0.757163	0.00631386	-0.0958528			4.9625	0.713869
4.01875	0.717796	0.0363382	-0.0656124			4.01875	0.741469	0.0483391	-0.0374737			4.01875	0.762257	0.0414248	-0.0400657			4.9625	0.736635	0.0311703	-0.0640689			4.9625	0.652659	0.0435063	-0.0762678									4.78333	0.762398	0.0181463	-0.0766934			4.78333	0.756495	0.0147371	-0.0824604			4.9625	0.721621
3.87292	0.726004	0.00884934	-0.105466			3.87292	0.759755	0.0016762	-0.103255			3.87292	0.780466	0.00706941	-0.0878287			4.9625	0.722944	0.055928	-0.0303534			4.9625	0.682922	0.0218056	-0.093737									4.78333	0.761083	0.0104582	-0.0898456			4.78333	0.773345	0.00436072	-0.0929536			4.9625	0.700541
3.87292	0.720127	0.0180023	-0.0936296			3.87292	0.754712	0.0113897	-0.0899549			3.87292	0.784281	-0.00200763	-0.0989967			4.78333	0.737305	0.0340326	-0.0593626			4.78333	0.66696	0.0428815	-0.0714561									4.78333	0.770366	0.00903795	-0.0883011			4.78333	0.782819	0.00194231	-0.0931822			4.78333	0.714349
3.87292	0.720862	0.0278694	-0.0774004			3.87292	0.746601	0.0220379	-0.0765926			3.87292	0.776118	0.0223808	-0.0643396			4.78333	0.72777	0.0500887	-0.0373522			4.78333	0.694127	0.0199307	-0.0945983									4.78333	0.769131	0.0116123	-0.0838253			4.78333	0.787037	0.00348656	-0.0890426			4.78333	0.695894
3.87292	0.739966	0.00770323	-0.101988			3.87292	0.768492	0.00442882	-0.0960158			3.87292	0.790179	0.00639571	-0.0849408			4.78333	0.731883	0.051617	-0.032844			4.78333	0.687278	0.0242196	-0.0916021									4.55	0.774862	0.00258185	-0.0947266			4.55	0.763337	0.000561931	-0.102022			4.78333	0.712335
3.87292	0.710377	0.0168165	-0.0982736			3.87292	0.747388	0.014508	-0.0880049			3.87292	0.77751	0.0127761	-0.0795691			4.78333	0.734236	0.0456394	-0.0410127			4.78333	0.676081	0.0264982	-0.0919704									4.55	0.782694	0.000780908	-0.0960088			4.55	0.774721	-0.0024528	-0.103269			4.78333	0.71895
																		4.78333	0.733318	0.0457135	-0.0415596			4.78333	0.664562	0.030356	-0.0889117									4.55	0.77561	0.00136819	-0.0970644			4.55	0.771623	0.000729281	-0.0991693			4.78333	0.708258
																		4.55	0.739064	0.0285297	-0.0675431			4.55	0.68306	0.0310102	-0.0831916									4.55	0.780911	0.00225383	-0.0937978			4.55	0.778274	-0.000913431	-0.0994814			4.55	0.715936
																		4.55	0.748024	0.0265987	-0.066347			4.55	0.69988	0.0171946	-0.0982356									4.55	0.78816	0.0296991	-0.0436987			4.55	0.785755	0.0267627	-0.0499348			4.55	0.725348
																		4.55	0.745415	0.0383929	-0.0484045			4.55	0.694452	0.0210567	-0.0944174									4.2375	0.768083	0.0128791	-0.0815601			4.2375	0.762407	0.0124323	-0.0830661			4.55	0.716877
																		4.55	0.751935	0.040221	-0.0422999			4.55	0.673264	0.0258732	-0.0945817									4.2375	0.768069	0.0142818	-0.0787423			4.2375	0.758832	0.0127517	-0.0840442			4.55	0.727307
																		4.55	0.747042	0.0375705	-0.0493975			4.55	0.681575	0.0220216	-0.0968077									4.2375	0.775496	0.0109554	-0.0813156			4.2375	0.760548	0.00948646	-0.0887347			4.55	0.714882
																		4.2375	0.728108	0.0317243	-0.0668163			4.2375	0.669088	0.0368887	-0.0802666									4.2375	0.784929	0.00935064	-0.0802159			4.2375	0.779225	0.00990644	-0.0811188			4.2375	0.696837
																		4.2375	0.751501	0.0209053	-0.0741761			4.2375	0.689334	0.0287329	-0.0851556									4.2375	0.78598	-0.000126366	-0.0952097			4.2375	0.787707	-0.00347817	-0.0998984			4.2375	0.7203
																		4.2375	0.754345	0.0314875	-0.0554086			4.2375	0.686237	0.0213484	-0.097801									4.01875	0.77355	0.0144263	-0.0760459			4.01875	0.764101	0.0124849	-0.082302			4.2375	0.722534
																		4.2375	0.755997	0.0340092	-0.0502979			4.2375	0.670334	0.0237544	-0.0992361									4.01875	0.769632	0.0120539	-0.0802632			4.01875	0.756861	0.0133055	-0.0836774			4.2375	0.722052
																		4.2375	0.75547	0.0307982	-0.056225			4.2375	0.686439	0.0133893	-0.10775									4.01875	0.775774	0.00365967	-0.0930324			4.01875	0.761582	0.00220368	-0.100614			4.2375	0.718728
																		4.01875	0.734899	0.0308508	-0.0651179			4.01875	0.659473	0.0311801	-0.0917414									4.01875	0.786534	0.00177906	-0.091348			4.01875	0.770877	0.00367996	-0.0945318			4.01875	0.700248
																		4.01875	0.754498	0.0182884	-0.0768595			4.01875	0.680804	0.0372821	-0.0760494									4.01875	0.787114	0.00134957	-0.0919296			4.01875	0.795618	-0.00307502	-0.096187			4.01875	0.716819
																		4.01875	0.745332	0.0271351	-0.0664107			4.01875	0.661393	0.0363558	-0.0858189																					4.01875	0.708742
																		4.01875	0.740545	0.0239552	-0.0732011			4.01875	0.641377	0.0414858	-0.0858933																					4.01875	0.703404
																		4.01875	0.733724	0.0227229	-0.0779386			4.01875	0.695392	0.00953176	-0.110685																					4.01875	0.698925
																		3.87292	0.736647	0.0228594	-0.0763788			3.87292	0.673165	0.0364448	-0.0797924																					3.87292	0.708171
																		3.87292	0.742791	0.0266745	-0.0677548			3.87292	0.66871	0.0329522	-0.0878648																					3.87292	0.708872
																		3.87292	0.752532	0.0283097	-0.0608175			3.87292	0.689797	0.0115308	-0.111346																					3.87292	0.71426
																		3.87292	0.739616	0.0303907	-0.063265			3.87292	0.661295	0.0373324	-0.0832822																					3.87292	0.705802
																		3.87292	0.740521	0.0275747	-0.0677064																											3.87292	0.710911
[truncated: 6 more columns]

## Sheet: Chlorophyll Fluorescence data
label	Polygonatum odoratum	Carex maculata	Pachysandra terminalis	Hosta plantaginea	Lilium lancifolium	Allium dumebuchum	Iris sanguinea	Phedimus takesimensis	Aster spathulifolius	Mukdenia rossii		Polygonatum odoratum	Carex maculata	Pachysandra terminalis	Hosta plantaginea	Lilium lancifolium	Allium dumebuchum	Iris sanguinea	Phedimus takesimensis	Aster spathulifolius	Mukdenia rossii		Polygonatum odoratum	Carex maculata	Pachysandra terminalis	Hosta plantaginea	Lilium lancifolium	Allium dumebuchum	Iris sanguinea	Phedimus takesimensis	Aster spathulifolius	Mukdenia rossii		Polygonatum odoratum	Carex maculata	Pachysandra terminalis	Hosta plantaginea	Lilium lancifolium	Allium dumebuchum	Iris sanguinea	Phedimus takesimensis	Aster spathulifolius	Mukdenia rossii		Polygonatum odoratum	Carex maculata	Pachysandra terminalis	Hosta plantaginea	Lilium lancifolium
soil moisture	31	31	31	31	31	31	31	31	31	31		21.5	21.5	21.5	21.5	21.5	21.5	21.5	21.5	21.5	21.5		7.4	7.4	7.4	7.4	7.4	7.4	7.4	7.4	7.4	7.4		6.1	6.1	6.1	6.1	6.1	6.1	6.1	6.1	6.1	6.1		4.6	4.6	4.6	4.6	4.6
JIP-Test
Fv/Fm	0.8105	0.803333	0.801	0.517	0.8215	0.842	0.81675	0.82525	0.833	0.825		0.775	0.737667	0.789667	0.7004	0.776667	0.764	0.747	0.7528	0.7825	0.774		0.7088	0.7105	0.776333	0.7315	0.761667	0.699833	0.707	0.6542	0.684333	0.725		0.443833	0.0831667	0.6478	0.702167	0.712333	0.6765	0.1975	0.572	0.5022	0.655667		-0.0503333	0.00233333	0.183167	0.581667	0.665833
ABS/RC	1.83148	1.7476	1.93576	4.34282	1.64912	1.53702	1.64294	1.84913	1.85039	2.03971		1.89361	2.0525	1.52534	2.59811	1.82945	1.90789	2.11041	2.33062	2.29138	2.16673		2.20894	2.21314	1.71949	2.27418	1.85872	2.21529	2.27262	2.55426	2.94068	2.4016		3.87948	-2.80381	2.10105	1.89888	1.78876	2.15267	9.43648	2.63011	3.89361	2.47363		29.173	2509.44	9.37963	2.34396	2.05389
RC/ABS	0.546007	0.581629	0.516593	0.230468	0.606383	0.650609	0.608664	0.540795	0.540428	0.490266		0.528092	0.487211	0.655592	0.384895	0.546611	0.52414	0.473841	0.429071	0.436418	0.461525		0.452705	0.451847	0.581567	0.439719	0.538005	0.451408	0.440021	0.391502	0.340058	0.41639		0.257766	-0.356657	0.475952	0.526625	0.559046	0.464539	0.105972	0.380213	0.256831	0.404265		0.0342782	0.000398495	0.106614	0.426628	0.486881
TRo/RC	1.48441	1.40212	1.55054	2.24369	1.35475	1.29417	1.34187	1.52599	1.54137	1.68276		1.46755	1.51406	1.20451	1.81972	1.42088	1.45763	1.57648	1.75449	1.793	1.67705		1.5657	1.57243	1.3349	1.66356	1.41572	1.55034	1.60674	1.671	2.0124	1.74116		1.72184	-0.233184	1.36106	1.33333	1.27419	1.45628	1.86371	1.50442	1.95537	1.62187		-1.46838	5.85536	1.71804	1.3634	1.36755
DIo/RC	0.347065	0.345475	0.385216	2.09913	0.294368	0.242849	0.301069	0.323135	0.309014	0.356949		0.426062	0.538439	0.32083	0.778394	0.408578	0.450262	0.533935	0.576128	0.498375	0.489681		0.643244	0.640703	0.384593	0.610617	0.442994	0.664957	0.665877	0.883264	0.928274	0.660439		2.15764	-2.57063	0.739991	0.565551	0.514567	0.696389	7.57278	1.12569	1.93824	0.851752		30.6414	2503.59	7.6616	0.980557	0.686341
ET2o/RC	0.865412	0.840456	0.837293	1.08819	0.838254	0.944422	0.962123	1.02699	1.05237	0.889759		0.828797	1.06539	0.821676	1.02232	0.998875	1.02763	1.06373	1.08989	1.165	0.968217		0.745899	0.939267	0.7669	0.978729	1.01956	1.08834	1.03474	0.848199	1.14707	0.88799		0.333177	-0.198517	0.745862	0.79	0.945027	1.03712	1.04554	0.767255	1.11417	0.811207		-1.32521	7.42069	-0.223631	0.65307	0.996714
RE1o/RC	0.305789	0.289455	0.411282	0.583272	0.279079	0.371104	0.314669	0.416215	0.404995	0.40891		0.324328	0.454218	0.430211	0.440735	0.444024	0.419554	0.436291	0.591613	0.517282	0.536656		0.397688	0.337549	0.309919	0.403414	0.447369	0.495332	0.36714	0.452841	0.484318	0.473595		0.406068	-0.051145	0.341627	0.336889	0.50097	0.51067	0.780582	0.505235	0.525994	0.485211		-0.188442	-0.371815	0.0861881	0.410157	0.595795
PI_ABS	3.26494	3.48472	2.44098	0.232931	4.5292	9.36232	6.87315	5.25616	5.80131	2.59327		2.36019	3.25319	5.28275	1.1536	4.49944	4.05504	2.9024	2.1428	2.9127	2.15902		1.00258	1.64505	2.72544	1.71208	4.42487	2.47926	1.92071	0.763525	0.977233	1.14256		0.0493535	-0.185266	1.06135	1.80522	3.97438	2.40357	0.0333281	0.528875	0.34318	0.770299		-0.0152051	-4.41827e-06	-0.0027535	0.54538	2.60746
PI_total ABS	1.78402	1.8195	2.35658	0.270562	2.26049	6.06015	3.34042	3.5818	3.62927	2.2053		1.51738	2.41773	5.80561	0.874225	3.60071	2.79787	2.01819	2.5442	2.32613	2.68479		1.14504	0.922831	1.84836	1.20052	3.45961	2.07091	1.05627	0.874537	0.714132	1.30578		-0.274942	-0.0642959	0.896962	1.34218	4.48378	2.33154	0.0981869	1.01979	0.306899	1.14651		-0.00252055	2.10815e-07	0.000765991	0.920871	3.87487
DF total ABS	0.251401	0.259882	0.372282	-0.571255	0.354202	0.782483	0.523801	0.554102	0.55982	0.343467		0.181096	0.383408	0.763848	-0.0583767	0.556388	0.446827	0.304962	0.405551	0.366634	0.42891		0.0588188	-0.0348777	0.266788	0.0793678	0.539027	0.316161	0.0237762	-0.058222	-0.146222	0.115872		#NUM!	#NUM!	-0.047226	0.127811	0.651644	0.367642	-1.00795	0.00851154	-0.513004	0.0593767		#NUM!	-6.6761	-3.11578	-0.0358013	0.588257
RC/CS	19557.6	20688.1	17953.9	8850.3	19745.2	25760.4	22593.3	20706.9	22911	21083.5		15623.6	12286.3	15087.8	10673.8	14098.8	15523.6	13460.3	11893.2	16199.4	15607.2		10998.8	10442	15564	11230.5	11790.6	9575.26	12221.5	7220.48	10388.4	12438.7		3333.82	-1466.22	6853.99	8336.03	8072.63	6971.18	1330.97	3656.12	4290.06	8337.36		168.849	0.697167	620.174	4580.35	4978.04
ABS/CS	35819.2	35708	34754.5	38411.5	32562.2	39594.2	37119.5	38289.8	42394.2	43004.2		29585	25217.7	23014	27731.6	25793.2	29617.3	28406.8	27718.6	37119	33816.7		24295.8	23109.5	26762.2	25540.2	21915.3	21212	27774.8	18443	30548.8	29872.8		12933.5	4111	14400.6	15829.2	14440	15006.7	12559.7	9616	16703.8	20623.5		4925.83	1749.5	5817	10736.2	10224.3
TRo/Cs	29031.5	28678.1	27838.4	19854.6	26749.9	33338.4	30317.4	31598.6	35314.4	35478.5		22928.4	18602.2	18173.4	19423.2	20032.7	22627.6	21219.8	20866.6	29045.6	26174.1		17220.9	16419.3	20776.4	18682.6	16692.2	14844.9	19636.8	12065.4	20905.6	21657.8		5740.32	341.898	9328.71	11114.7	10286.1	10152	2480.53	5500.35	8388.65	13522.1		-247.934	4.08217	1065.48	6244.87	6807.7
ET2o/CS	16925.4	17097.8	15032.7	9629.5	16551.5	24328.7	21737.5	21265.9	24110.9	18759.3		12948.8	13089.8	12397.3	10912	14083	15952.5	14318.1	12962.3	18872.4	15111.2		8204.02	9807.8	11936	10991.6	12021.2	10421.1	12646.1	6124.4	11916.2	11045.5		1110.75	291.069	5112.13	6585.47	7628.85	7229.92	1391.58	2805.18	4779.85	6763.32		-223.76	5.17347	-138.69	2991.29	4961.68
DIo/CS	6787.75	7029.87	6916.15	18556.9	5812.36	6255.89	6802.15	6691.13	7079.84	7525.74		6656.62	6615.43	4840.61	8308.39	5760.47	6989.69	7186.91	6852.04	8073.38	7642.57		7074.94	6690.2	5985.8	6857.53	5223.15	6367.14	8138.03	6377.59	9643.25	8215.03		7193.18	3769.1	5071.89	4714.45	4153.91	4854.66	10079.1	4115.65	8315.15	7101.36		5173.77	1745.42	4751.52	4491.3	3416.63
RE1o/CS	5980.49	5878.57	7384.12	5163.91	5510.48	9559.77	7109.42	8618.52	9278.86	8621.28		5067.17	5580.67	6490.93	4704.3	6260.22	6512.99	5872.59	7036.2	8379.66	8375.71		4374.1	3524.68	4823.58	4530.54	5274.73	4742.93	4487.01	3269.73	5031.28	5890.92		1353.76	74.9897	2341.51	2808.32	4044.15	3559.97	1038.93	1847.2	2256.55	4045.37		-31.8181	-0.259218	53.4516	1878.67	2965.89
OJIP
time(ms)	Polygonatum odoratum	Carex maculata	Pachysandra terminalis	Hosta plantaginea	Lilium lancifolium	Allium dumebuchum	Iris sanguinea	Phedimus takesimensis	Aster spathulifolius	Mukdenia rossii		Polygonatum odoratum	Carex maculata	Pachysandra terminalis	Hosta plantaginea	Lilium lancifolium	Allium dumebuchum	Iris sanguinea	Phedimus takesimensis	Aster spathulifolius	Mukdenia rossii		Polygonatum odoratum	Carex maculata	Pachysandra terminalis	Hosta plantaginea	Lilium lancifolium	Allium dumebuchum	Iris sanguinea	Phedimus takesimensis	Aster spathulifolius	Mukdenia rossii		Polygonatum odoratum	Carex maculata	Pachysandra terminalis	Hosta plantaginea	Lilium lancifolium	Allium dumebuchum	Iris sanguinea	Phedimus takesimensis	Aster spathulifolius	Mukdenia rossii		Polygonatum odoratum	Carex maculata	Pachysandra terminalis	Hosta plantaginea	Lilium lancifolium
0.011	162	162	162	162	128	167.75	162	162	162	162		162	205.667	134	195	186.167	238.167	207.5	201.4	203	178.5		168.6	200.333	162	185.667	162.667	275.833	205.833	202.6	195	182.333		200.333	137.333	143	142.333	134	232.167	200.333	144	214.2	189.333		162	151.333	143.333	144	152.333
0.021	6469	6740	6566.75	17441.5	5536	6017.5	6542.5	6388	6704.75	7054.5		6396	6447.67	4677	7984.2	5592.67	6772.5	6935	6579.8	7639.5	7260.17		6598.2	6431.5	5768.67	6619.5	5082.67	6266.67	7834.67	6183.6	8869.67	7828.33		6881	3693.33	4820.8	4600.67	4057.33	4816.5	9709.5	4030.67	7808.8	6779.83		5184.83	1839.67	4436.83	4173.5	3410.83
0.031	6769.75	7043.67	6899.75	18270.5	5791.25	6274.75	6826.75	6680.25	7054.25	7444.5		6680.5	6696.67	4868.33	8361.4	5823.5	7043.5	7231.75	6865.8	8021.75	7612.17		6901.8	6702.17	6031.17	6934.17	5295.5	6520.67	8165.17	6443.8	9330.17	8227.67		7135.83	3799.83	5014.6	4781.83	4201.83	4998	9991.17	4180.33	8120.8	7074.17		5322.67	1894	4576.5	4328.17	3532.17
0.041	6940.5	7195.33	7078.75	18710	5937	6418.5	6965	6843.25	7249.5	7688.5		6818.75	6805	4949.5	8562.8	5933.5	7179.17	7388.25	7034.8	8249.25	7818.33		7047.8	6832.33	6159.17	7087.83	5386.67	6626.5	8322.33	6567.8	9611.83	8451.5		7249.5	3816.33	5092.2	4858.17	4258.5	5064.33	10067.2	4238.33	8283.2	7211.83		5341.67	1901	4611.5	4389.5	3577
0.051	7103	7347	7274	19083.5	6049	6538	7086.75	7013.5	7444.5	7932		6965	6902.67	5022.67	8744.8	6022.17	7287.33	7540.5	7158.2	8468.5	8002.67		7183.4	6946	6277.67	7232.83	5469.33	6716.33	8463.33	6677	9850.33	8660.83		7341.67	3823	5153.8	4924.67	4303	5120.67	10110.5	4289.83	8380.8	7343.83		5350.5	1907	4632	4436.17	3608.67
0.061	7274	7498.67	7461	19441	6184	6671	7216.75	7184.25	7655.75	8216.25		7119.5	7000	5091	8946.4	6111	7395.83	7659.5	7294.8	8679.75	8192.33		7318.4	7065.17	6394.83	7394.33	5546.83	6808.17	8609.5	6792.4	10099.8	8865.33		7439	3831.33	5217.6	4988	4344.67	5175.5	10142.8	4336.33	8511	7463.33		5346.67	1908.5	4655.67	4484.33	3641.83
0.071	7460.75	7650.33	7656	19798.5	6311.5	6782.25	7346.75	7347	7851.25	8493		7257.75	7086.67	5158.83	9135	6207	7504.17	7809	7450.8	8899.25	8398.33		7454	7173.83	6513.83	7539.33	5629.5	6887.17	8745	6901.2	10338.2	9083.5		7531.33	3833	5273.6	5051	4384.67	5227	10164.7	4381.33	8615	7588.33		5350.5	1908.5	4669	4534.33	3673.5
0.081	7623.5	7813	7859	20156.5	6441.5	6923.25	7469	7509.5	8062.25	8785.5		7404	7195.33	5232.17	9317	6295.5	7618.17	7944.25	7587.6	9127	8598.67		7591.4	7287.33	6644.83	7696.67	5701.33	6970	8880.5	7016.8	10582	9300.17		7612.5	3838	5337.6	5117.33	4424.67	5278.67	10202.7	4426.17	8725.4	7713.33		5352.17	1909.17	4691.17	4577.33	3700
0.091	7818.25	7964.33	8062.25	20465.5	6576.75	7050.75	7590.75	7680.25	8273.5	9062		7550.25	7282	5300.33	9499.4	6391.67	7737.17	8080	7737.2	9338.25	8793.67		7722.4	7395.67	6760.17	7836.33	5780.83	7062	9016	7112.6	10804	9502		7704.5	3839.67	5399.4	5180.5	4461.33	5326.83	10245.8	4467.67	8816.4	7838.33		5353.83	1910.33	4706.17	4625.67	3730
0.101	7997.25	8116.67	8273.75	20774	6711.75	7184	7729	7859	8468.5	9362.75		7704.5	7390.33	5371.67	9681.4	6473.33	7829.33	8194.5	7880.2	9541.5	9005		7853.4	7515	6879	7983	5853.33	7139.67	9146	7228.2	11026.2	9724.17		7791.33	3841.33	5459.2	5245.5	4501	5375.17	10246	4517.67	8926.8	7958		5353.83	1910.17	4717.67	4670.33	3758.33
0.111	8184	8290	8485	21066.5	6857.5	7303	7867.5	8021.75	8672	9671.75		7850.75	7466	5439.67	9850.4	6558.83	7937.5	8317.25	8023.2	9769.25	9200		7999.2	7612.33	7008.17	8133.5	5922	7210	9265.17	7330.8	11232	9931.83		7878	3844.67	5518.8	5308.67	4535.83	5423.17	10283.7	4557.5	9005	8072.17		5348.33	1910.17	4736.33	4717	3785
0.121	8371	8463.33	8696.5	21342.5	6992.5	7428.25	7972.75	8200.5	8867	9988.75		8005.25	7542	5509.5	10045.4	6654.83	8045.83	8442	8172.8	9972.25	9406		8134.8	7742.5	7128.83	8272.67	5996	7298.17	9395.17	7439.6	11432.5	10144.8		7964.67	3849.67	5578.6	5368.33	4574.17	5469.67	10305.3	4599	9096	8195.17		5352.17	1910.17	4749.67	4758.5	3811.5
0.131	8558	8615	8907.5	21587	7144	7553.25	8110.75	8387.25	9062	10297.5		8151.75	7639.67	5579.5	10207.8	6736.17	8138	8561.75	8316	10167.5	9606.5		8274	7845.33	7251.67	8414.33	6068.33	7359.83	9519.83	7544.2	11632.8	10345		8029.67	3849.67	5630.6	5431.33	4604	5511.33	10327.2	4638.83	9187	8315		5346.83	1913	4768.5	4806.5	3843
0.141	8753.25	8788.33	9110.75	21847	7278.5	7680.5	8224.75	8541.75	9249	10597.8		8306	7737.33	5649.5	10357.6	6831	8241	8673.5	8465.2	10370.5	9807.17		8400.4	7948.5	7382.67	8537.5	6140.67	7435.67	9628	7653.2	11817.5	10536.5		8121.67	3852.83	5694.4	5492.83	4640.33	5556.17	10348.8	4685.33	9265	8432.67		5341.33	1910.67	4781.67	4849.83	3868
0.151	8940	8961.67	9322	22074.5	7427.25	7794.75	8346.75	8704	9436	10898.5		8452.25	7802.33	5717.17	10526.8	6916.17	8344	8785.5	8614.8	10557.8	10002		8539.8	8062.33	7504.83	8676.83	6200.67	7502.67	9736.33	7749.2	11979.8	10736.5		8186.83	3856.17	5748.4	5551.17	4675.33	5597.83	10354.3	4723.67	9330	8546.67		5353.83	1910.83	4791.67	4893.17	3889.5
0.161	9119	9113	9533.25	22286	7567.5	7920	8460.5	8875.25	9622.75	11207.8		8598.5	7899.67	5790.33	10689.2	6996.17	8430.83	8905.5	8757.8	10728.2	10191.8		8664	8165.17	7618.17	8816.67	6273.17	7573	9850.33	7858.2	12164.2	10931.7		8273.33	3859.5	5802.2	5614.5	4708.67	5640.67	10386.7	4763.5	9401.8	8647		5353.83	1910.33	4808.67	4938.17	3917.67
0.171	9306	9287	9728.25	22513	7710.5	8026	8565.75	9029.5	9777.25	11492		8753.25	7964.67	5855.17	10825.6	7089.17	8528.33	9006.5	8900.8	10915	10397.5		8810	8262.67	7740.5	8944	6333.5	7641.67	9953.33	7945.6	12321	11121.2		8343.83	3859.5	5855.8	5675.83	4741.83	5679	10397.3	4800	9473	8764.83		5353.83	1910.83	4822	4981.17	3939.17
0.181	9484.5	9438.67	9923.75	22708	7848.25	8151	8696.25	9192	9939.75	11784.5		8899.5	8062.33	5926.67	10975	7168.83	8620.5	9110.5	9037.4	11085.8	10576.3		8934.6	8365.83	7861	9061.67	6395.5	7701.67	10045.3	8050	12478.5	11305.3		8419.67	3861.17	5907.6	5732.17	4775.17	5715.67	10413.7	4841.67	9525.4	8861		5355.5	1910.17	4833.5	5022.67	3965.83
0.191	9671.75	9601.33	10126.8	22887.5	7980.5	8249.25	8802	9346.25	10102.5	12061.2		9037.5	8138	5991.5	11118.4	7245.33	8712.33	9192.75	9180.8	11248	10760.7		9067.6	8463.33	7974.33	9179.5	6459.17	7764.83	10153.8	8144	12630.2	11484.2		8490.33	3866.17	5961.4	5790.33	4803.33	5755.5	10435.5	4876.67	9583.8	8968.17		5352.17	1910.17	4850.67	5064.33	3987.33
0.201	9834	9785.33	10313.5	23066.5	8127	8363.5	8915.75	9492.75	10265	12329.5		9192	8203	6059.67	11261.2	7332.83	8799.17	9302	9317.2	11419	10934.2		9187.4	8555.33	8089.83	9302.83	6521	7819.33	10251.2	8240	12771	11650.3		8555.17	3866.17	6013.4	5846.83	4838.33	5793.67	10441	4916.33	9648.8	9066.67		5346.67	1910.83	4862.33	5107.33	4012.33
0.211	10013	9915.33	10500.5	23245	8259	8469.5	9013.25	9639	10411	12605.8		9322	8278.67	6124.5	11385	7404.17	8886	9382.25	9427.6	11557.2	11102.2		9312	8658.17	8199.83	9408.33	6577.67	7874	10337.8	8327.4	12911.7	11816.7		8620.33	3871.17	6065.4	5903.5	4866.67	5828.67	10462.5	4947.83	9707.2	9173.83		5353.83	1910.83	4874	5144	4034
0.221	10183.5	10078	10695.5	23375	8394.5	8584	9119	9793.25	10549.2	12865.8		9460	8354.67	6189.33	11515.2	7486	8972.33	9483.5	9564	11711.5	11275.5		9421.4	8761.33	8314.83	9519.17	6638	7935.5	10424.8	8414.8	13041.8	11977.3		8685.33	3869.5	6113.4	5961.67	4891.67	5863.67	10484	4981.17	9752.8	9261.17		5341.33	1910.17	4887.67	5182.33	4055.67
0.231	10346.2	10229.7	10866.2	23537.5	8527.75	8679.25	9208.25	9923.5	10695.2	13125.8		9598.5	8419.67	6253.83	11638.6	7559.33	9042.83	9571.5	9674.8	11866	11438		9547.6	8842.5	8423.17	9624.33	6691	7990.17	10522.3	8508.8	13166.7	12131.2		8755.67	3872.83	6163	6013.17	4923.17	5897	10495.2	5016	9805	9355.67		5352.17	1911.33	4897.5	5220.67	4075.67
0.241	10516.8	10392	11053	23683.5	8657.5	8783	9306	10053.5	10833.8	13369.5		9728.5	8495.67	6322.17	11775.2	7634.17	9129.67	9653.75	9811.2	11996.2	11605.8		9663.6	8923.83	8531.5	9729.83	6746	8043.17	10598.3	8577	13285.5	12292.2		8810.17	3874.5	6210.6	6067.83	4956.17	5929.83	10517	5052.67	9850.4	9448.5		5352.17	1912.5	4907.5	5262	4097.17
0.251	10679.2	10532.7	11224	23813.5	8782.25	8878.75	9395.25	10183.5	10963.8	13613.5		9866.75	8560.33	6382.17	11879.2	7705.83	9205.67	9736.5	9928.4	12134	11757.5		9779.4	9021	8638	9835.33	6804.83	8097.67	10684.8	8670.8	13404.8	12433.3		8875	3877.83	6260.4	6119.33	4979.33	5963.17	10516.8	5082.5	9902.4	9532.33		5348.33	1910.83	4914.17	5300.33	4118.83
0.261	10833.8	10674	11394.8	23960	8915.25	8974.25	9492.75	10321.8	11094	13849.2		9988.75	8625.33	6445.33	11989.6	7780.67	9276	9816.5	10038.8	12272.5	11915		9884	9097.17	8742.33	9935.33	6856.33	8139.67	10760.7	8751.8	13518.5	12576		8934.83	3879.5	6306.4	6171	5009.33	5994.83	10533	5115.67	9941.6	9618		5346.83	1911.33	4931.33	5336.67	4138.83
0.271	10980	10814.7	11557.2	24090	9026.75	9075.5	9582.25	10435.8	11216	14068.5		10118.8	8690.33	6504.67	12100	7846.83	9351.67	9896.5	10156	12394	12055.8		9998	9178.33	8841.83	10033.3	6908	8190.83	10841.8	8830.8	13632.7	12717.5		8988.83	3881.17	6348.4	6222.5	5036	6026.33	10544	5147.33	9986.8	9716.33		5348.5	1910.83	4934	5373.17	4158.5
0.281	11134.5	10966.7	11711.8	24203.5	9154.25	9160.5	9671.5	10557.2	11337.8	14304.5		10232.5	8755.67	6569.67	12210.6	7918.67	9433.17	9970.75	10273	12524.2	12202.2		10096.8	9254.5	8944.83	10115.7	6959.5	8238.17	10923.2	8905.2	13735.3	12847.8		9043	3882.83	6392.4	6277.33	5062.67	6056.17	10554.8	5180.67	10032.6	9798.5		5353.83	1912	4949.5	5406.5	4178.5
0.291	11289.2	11086	11874	24301.5	9276.5	9256.25	9744.5	10679.2	11459.5	14523.8		10370.5	8820.67	6628	12308	7986.67	9498.17	10048	10370.6	12638.2	12337.5		10197.4	9335.5	9042.5	10219.5	7007.67	8284.17	10983	8971.2	13827.5	12971.3		9091.67	3886.17	6434.4	6324	5087.67	6084.5	10571	5207.17	10071.6	9873.33		5346.67	1911.33	4957.83	5438.17	4195.17
0.301	11435.2	11226.7	12036.8	24448	9388.25	9341.25	9842.25	10793.2	11573.5	14727		10476.2	8886	6686.17	12405.6	8057.83	9568.67	10120	10487.8	12752	12478.3		10313.2	9406.17	9141.83	10308.5	7062.5	8338.67	11058.7	9056.4	13941.5	13101.5		9151.33	3887.83	6478	6368.67	5114.17	6114.5	10576.3	5237.17	10097.2	9955.67		5346.83	1912	4966	5476.33	4215.17
0.311	11573.8	11357	12191	24562	9500.25	9426	9907.25	10898.5	11695.2	14930.2		10590	8940	6746	12509.6	8124	9622.67	10181.2	10578.4	12866	12613.8		10408	9476.67	9237.83	10396	7107.33	8372.17	11123.7	9116	14017.2	13230.3		9200	3889.5	6517.8	6418.33	5135.67	6141.17	10581.8	5268.67	10149.4	10025.2		5348.5	1913.67	4981.33	5508	4233.5
0.321	11727.8	11487	12329.2	24659	9625.5	9508.5	10004.5	11012.8	11801.2	15133.2		10712	8994.33	6803.83	12607.2	8183.33	9693.17	10253	10676.2	12987.8	12738.3		10500.4	9552.5	9326.83	10476.3	7148.33	8423.33	11194	9180.2	14120.2	13342.7		9259.67	3889.5	6559.6	6463.33	5163.83	6169.5	10587.3	5295.17	10182	10100.3		5348.5	1912.5	4984.33	5542.83	4255.17
0.331	11866	11616.7	12467.5	24757	9729	9601.75	10069.8	11118	11906.5	15344.8		10817.2	9048.67	6857.17	12685.4	8242.33	9758.17	10322.8	10773.6	13077	12863		10594.8	9628.17	9413.83	10556.8	7198.33	8460.17	11259	9252.8	14201.5	13462.2		9292.17	3891.17	6597.6	6508.17	5187.17	6199.17	10603.5	5325.17	10214.4	10175.2		5352.17	1911.83	4998	5574.5	4268.5
0.341	11988	11746.7	12621.8	24838	9854.75	9676.25	10142.8	11232	12012.5	15532		10923.2	9102.67	6917	12769.8	8303.67	9823.17	10400	10864.8	13190.8	12987.7		10693.8	9704	9511.67	10638.8	7245	8502.5	11324	9312.4	14293.5	13573		9341.17	3891.17	6639.6	6553.17	5210.5	6225.67	10609	5351.67	10253.4	10243.2		5346.67	1911.83	5003	5607.83	4285.17
0.351	12126	11855	12760.2	24935.5	9953.25	9753	10232.5	11329.5	12117.8	15710.5		11036.8	9168	6968.67	12867.4	8364.33	9882.83	10453	10968.6	13288.2	13112.2		10786	9769.17	9591.33	10721.3	7294.83	8544.5	11389.2	9389.2	14374.8	13685.7		9384.33	3894.5	6679.4	6596.5	5237	6250.67	10619.8	5375	10273.2	10318		5348.33	1909.83	5013	5639.17	4303.33
0.361	12264.2	11974.3	12898.5	25033	10054.8	9843.25	10305.5	11443.2	12215.5	15905.5		11126.2	9211	7021.83	12952.2	8430.83	9947.83	10522.5	11046.8	13377.5	13231.3		10863.4	9823.33	9675.33	10796.2	7334.33	8581.33	11443.3	9440	14461.3	13791.3		9438.5	3896.17	6719.4	6644.67	5258.67	6274	10636	5403.33	10312.2	10382.2		5341.33	1911.33	5021.33	5669.17	4320
0.371	12394.2	12093.3	13020.2	25130.5	10169.5	9917.5	10378.8	11516.5	12321.2	16060		11232.2	9265	7078.33	13023.6	8488.17	10007.5	10581.2	11118.2	13475.2	13345.3		10954	9893.67	9762.17	10865.8	7377.33	8620.17	11508.3	9504	14542.7	13896.5		9487.17	3899.5	6755.4	6684.33	5282	6298.67	10641.5	5426.67	10338	10448.5		5353.83	1911.83	5024.67	5702.17	4336.5
0.381	12524.8	12201.7	13150.2	25211.5	10273.5	9992	10443.8	11630.5	12418.8	16246.8		11337.5	9319.33	7126.17	13108.2	8547.33	10067.3	10642.2	11215.8	13581	13448.2		11031.2	9947.83	9845.83	10946	7425.33	8662.17	11568	9561.6	14618.5	13989.3		9519.83	3899.5	6791	6724.17	5305.17	6323.67	10646.8	5451.33	10377	10505.7		5343	1913	5034.67	5727.17	4351.33
0.391	12654.5	12321.3	13280	25309.5	10372.2	10066.2	10517	11719.8	12508.2	16417.5		11427.2	9352	7179.5	13186	8597.67	10116	10692.8	11293.6	13662	13562		11117.2	10012.8	9922.33	11010.2	7466.67	8697.67	11611.2	9612.4	14678	14084		9563	3901.17	6824.8	6769	5325.17	6347	10652.3	5478	10396.6	10573.5		5352.17	1911.5	5045	5758.83	4369.67
0.401	12760.2	12430	13402	25374.5	10473.8	10140.5	10582	11809	12605.5	16572		11533	9406.33	7236.17	13270.4	8658.83	10175.5	10762.2	11372	13743.5	13654.2		11199	10072.5	10006.2	11085.3	7504.5	8731	11681.7	9668	14754	14189.5		9601.33	3901.17	6860.8	6805.67	5348.5	6373.67	10668.3	5499.5	10422.6	10632		5346.83	1912	5056.67	5787.17	4383
0.411	12890	12538	13516	25455.5	10570	10223.2	10647	11906.8	12695.2	16734.8		11622.2	9449.33	7282.5	13335.4	8710.83	10235.2	10821	11450	13841	13773.3		11287.6	10121.2	10089.7	11149.5	7545.67	8762.67	11725.2	9725.4	14840.8	14271.7		9650	3904.5	6894.8	6845.5	5371.83	6397	10668.5	5521.17	10461.6	10698.2		5346.83	1912.5	5061.67	5813.67	4402.67
0.421	13012	12635.7	13646	25536.5	10666	10287	10720	11980	12792.8	16889		11719.8	9492.67	7332.5	13413.6	8772.33	10278.5	10874	11534.4	13914.2	13876.3		11356.4	10186.3	10164.8	11222.8	7585.17	8806.83	11784.7	9774.4	14884.2	14380.5		9693.33	3906.17	6926.6	6883.83	5391.5	6417	10684.7	5546.17	10474.6	10748.3		5348.33	1912	5068.33	5842	4414.33
0.431	13134	12744	13776	25618	10760	10369.5	10785.2	12077.5	12873.8	17051.8		11801	9536	7382.33	13472	8815.33	10343.3	10924.8	11599.4	14003.8	13963		11438.4	10245.8	10243.2	11279.8	7621.33	8838.33	11828	9823.6	14949.3	14457.3		9715	3907.83	6964.6	6922.17	5416.5	6440.17	10684.7	5569.5	10500.4	10816.2		5341.5	1912.5	5075	5872	4432.67
0.441	13231.5	12841.3	13889.8	25683	10850.5	10441.2	10842	12167	12963.5	17198		11882.2	9590.33	7430.5	13543.4	8875	10392	10978	11677.4	14093	14066		11505.4	10294.8	10316.2	11351	7658.83	8871.67	11887.7	9872.4	15025	14543		9763.5	3907.83	6998.6	6960.33	5434.83	6465.17	10706.5	5589.5	10533.2	10866.3		5343	1912	5085.33	5898.5	4444.33
0.451	13345.2	12928	13987.5	25748	10950	10505	10907	12248	13060.8	17336		11971.8	9622.67	7482	13608.4	8918	10446.3	11026.2	11749	14174.2	14157.8		11572.2	10348.8	10387.8	11411.8	7702.17	8903.33	11936.2	9921.4	15084.7	14625.2		9790.83	3909.5	7026.6	6998.67	5453	6485	10711.8	5609.5	10552.4	10917.8		5346.67	1912	5090.33	5923.33	4459.33
0.461	13459	13036.7	14109.2	25813	11043.8	10571.2	10972	12337.2	13133.8	17474		12061.2	9666	7525.17	13673.4	8972.17	10489.7	11084.8	11807.6	14231.2	14250.2		11654.2	10397.5	10459	11463.3	7740	8935	11990.7	9977	15155.3	14707.3		9834.33	3911.17	7058.2	7033.33	5473	6506.67	10722.7	5629.33	10572.2	10978.7		5341.33	1911.5	5098.67	5949.83	4477.67
0.471	13564.8	13133.7	14207	25878	11132.8	10635	11037	12410.5	13223.5	17628.5		12134.2	9698.67	7570	13738.4	9019.33	10554.8	11135.5	11879	14320.8	14331.3		11719	10451.8	10530.7	11533	7770.83	8973.67	12028.5	10010.8	15209.5	14787.5		9861.17	3912.83	7092	7069.83	5498	6528.17	10722.7	5650.83	10598	11034.2		5337.67	1913.5	5105.33	5973.17	4489.17
0.481	13670	13242.3	14312.5	25943	11223.2	10709.2	11102	12483.5	13296.5	17758.8		12215.5	9753	7620	13790.4	9073.5	10592.7	11186	11937.6	14394	14429		11784	10495.2	10598.2	11579.3	7817.33	9003.83	12088	10066.4	15269	14864		9904.67	3916.17	7120	7106.33	5514.67	6548.17	10728	5672.33	10624	11080.5		5350.5	1911.5	5110.33	5999.67	4502.5
0.491	13768	13329	14426.5	25992	11306.5	10773.2	11159	12564.8	13386	17888.8		12304.8	9785	7661.33	13855.6	9119	10641.5	11236.5	11989.4	14467	14510.2		11851	10543.8	10671.7	11640	7848	9028.17	12126.3	10108.6	15317.8	14944.7		9931.67	3914.5	7154	7139.5	5534.5	6568	10744.5	5694	10643.6	11130.5		5346.67	1912	5117	6023	4517.5
0.501	13881.8	13404.7	14523.8	26073.5	11387	10845	11215.8	12646.2	13467	18018.8		12369.8	9818	7706.33	13914	9160.67	10684.7	11279.2	12061	14540	14597		11920.6	10592.7	10734.2	11686.2	7880.67	9059.83	12169.5	10151.4	15382.7	15023.7		9969.33	3916.17	7179.8	7172.83	5554.5	6586.17	10744.5	5710.67	10669.6	11184.3		5346.83	1912	5123.67	6048	4530.83
0.511	13979.2	13502.3	14613.2	26122	11476	10906	11272.5	12727.5	13540.2	18157		12451	9872	7751.17	13979	9209.33	10728.2	11318.8	12106.6	14596.8	14678.2		11974.4	10646.7	10798.8	11754.2	7909.5	9089.83	12212.8	10198.4	15431.3	15094.8		10002	3917.83	7209.8	7204.5	5574.5	6609.5	10749.8	5735.67	10695.6	11223.5		5346.83	1913.67	5128.67	6071.33	4542.5
0.521	14076.8	13578.3	14727	26187	11562	10978	11345.8	12792.5	13630	18270.8		12524.2	9904.33	7796.17	14024.6	9258	10771.3	11369.5	12178	14661.8	14754		12052.4	10690.3	10864.8	11800.5	7952.83	9121.33	12261.3	10245.2	15485.7	15175		10034.7	3919.5	7239.8	7237.83	5592.83	6626.17	10760.5	5752.17	10708.8	11273.7		5346.83	1912	5132	6094.5	4555.83
0.531	14182.5	13675.7	14816.2	26220	11636.8	11039.2	11394.2	12873.8	13703	18400.8		12597.2	9948	7835.83	14083	9296.33	10825.5	11409.8	12230.2	14735	14835.5		12100.4	10728.2	10925.5	11855.8	7982	9151.33	12305	10272.8	15540	15232.2		10061.7	3921.17	7269.6	7269.33	5610.83	6642.83	10755.2	5768.67	10734.4	11329		5341.33	1912.5	5140.83	6117.67	4569.17
0.541	14271.8	13773.3	14905.8	26285	11720.5	11103	11443.2	12963.2	13776	18514.5		12670.8	9980.33	7882.5	14141.8	9346.83	10863.7	11460.5	12282	14800	14905.8		12172	10771.5	10986.2	11907.3	8014.33	9181.33	12348.2	10320	15594	15300.2		10094.2	3919.5	7293.6	7302.5	5630.67	6664.33	10765.8	5788.67	10741	11364.8		5334.33	1911.5	5143.67	6140.83	4579.17
0.551	14377.5	13838.3	15003	26350	11798.5	11158.5	11508.2	13020	13841.2	18628.5		12743.8	10012.7	7922.5	14187.4	9383.17	10901.5	11500.2	12334.2	14865	14981.7		12226.2	10809.3	11045.3	11957.5	8049	9205.83	12386.2	10355.6	15637.3	15369.7		10121.3	3924.33	7327.6	7330.83	5647.33	6681	10771.3	5805.33	10773.6	11411		5339.83	1913.5	5154	6160.83	4592.5
0.561	14459	13925	15092.5	26398.5	11876.5	11219.8	11557	13093.2	13930.5	18742.2		12808.8	10045.3	7962.17	14239.4	9424.67	10955.7	11551	12392.8	14930.2	15057.7		12278	10858.3	11117	11998.3	8083.67	9226.83	12434.8	10394.2	15691.5	15433.8		10137.5	3924.5	7351.4	7364.17	5664	6701	10782.3	5825.17	10793.2	11453.8		5341.33	1912.5	5160.67	6184.17	4604.17
0.571	14548	14012	15190.2	26447	11954.5	11275.2	11606	13158.2	13987.5	18855.8		12882	10077.7	8003.83	14297.8	9466.83	10993.7	11599.2	12438.2	14979	15117.3		12339	10896	11169.2	12053.7	8114.17	9260.33	12467.5	10428.2	15729.5	15501.7		10175.5	3922.83	7375.2	7395.67	5684	6716	10782.3	5840.17	10799.8	11491.3		5334.33	1911.17	5164	6204.17	4619.17
0.581	14637.8	14077	15279.2	26496	12022	11344.5	11671	13223.2	14052.5	18961.5		12947	10099.7	8046.83	14343.4	9506.83	11026.2	11630.8	12490.2	15044	15203.8		12389	10939.5	11231.8	12098.2	8141.83	9281.83	12516.2	10468.8	15778	15564.2		10213.2	3924.33	7401.2	7427.33	5700.67	6736	10793.2	5853.5	10825.6	11539.7		5339.83	1913	5170.67	6225.83	4630.5
0.591	14719	14163.7	15360.8	26561	12092.5	11400.5	11711.8	13288.5	14125.8	19083.5		13003.8	10142.7	8083.5	14389	9541.17	11069.3	11665.5	12542.2	15101	15263.3		12450	10977.3	11287.5	12148.3	8172.5	9308.17	12549	10509.2	15827	15615.7		10240.5	3922.67	7433.2	7451.83	5717.33	6754.33	10793.3	5873.5	10838.6	11582.5		5334.33	1912.5	5175.67	6245.83	4642
0.601	14800	14228.7	15450.5	26593.5	12170.5	11461.8	11768.8	13345.2	14198.8	19172.8		13085	10186	8123.33	14441.2	9585	11112.8	11713.2	12581.4	15157.8	15333.8		12506.2	11020.8	11344.8	12193	8205.5	9325.5	12581.5	10541.2	15875.7	15683.8		10262.2	3929.33	7457.2	7483.5	5732.33	6771	10798.7	5891.83	10858	11621.7		5341.33	1914.67	5180.67	6267.5	4655.33
0.611	14889.8	14326	15531.8	26642.5	12243.5	11523	11817.2	13418.5	14263.8	19286.5		13134	10218.7	8164.83	14480	9623.5	11150.8	11745.2	12640	15214.8	15398.8		12560.8	11047.8	11398.7	12237.3	8228.83	9350.17	12624.7	10575.2	15919	15744.8		10284	3929.33	7479	7510.17	5750.67	6787.5	10809.3	5905.17	10871.2	11663		5343	1912.5	5187.17	6285.5	4663.67
1.021	17279.2	16515	17929.2	27894	14325.2	13350.8	13459	15336.5	16320	22163.8		14938.5	11150.7	9371.33	15761	10735.2	12310.5	12898	13843	16750.8	17268.2		14098.6	12142.3	13119.7	13504.2	9090.33	10096.3	13751.5	11539.8	17127.3	17432.5		11037.2	3962.5	8264.4	8369.5	6277.33	7307.5	10961.2	6383.67	11378.4	12822		5332.67	1913.5	5349.5	6892	5012.67
1.121	17645	16883.3	18303	28072.5	14653	13677.2	13768	15653.2	16677.8	22610.8		15239	11324	9587	15975.6	10906.8	12521.5	13094.8	14018.2	16995	17550		14355.4	12332.2	13416.3	13712.7	9241	10232.2	13946.7	11695.2	17322.3	17701.3		11167.2	3972.5	8406.2	8522	6372	7400.67	11004.5	6468.33	11469.4	13018.7		5332.67	1914.5	5372.67	6998.67	5079.33
1.221	17945.5	17219.3	18636.5	28219	14950	13969.8	14036	15929.8	16970.2	22977		15507	11465	9775.33	16144.6	11068.3	12700.5	13264.8	14180.8	17198	17788.5		14576	12494.5	13687.2	13883.3	9371.33	10344.5	14120.2	11835.8	17495.8	17936.7		11275.3	3979.17	8534	8658.5	6456.67	7482.17	11031.5	6543.17	11547.2	13186.3		5332.67	1914.5	5403.17	7093	5134.17
1.321	18189.5	17501.3	18888.5	28365.5	15187	14232.8	14279.8	16157.5	17230.2	23293.5		15726.8	11595	9944.5	16300.6	11203.3	12852.2	13429.5	14297.8	17384.8	17994.5		14778.4	12640.8	13923.3	14052.7	9486.33	10455.5	14293.7	11957.4	17642.2	18154.3		11383.7	3984.17	8651.4	8781.33	6534.83	7556.67	11053	6611.33	11625.4	13341.7		5331	1914.5	5424.83	7174.5	5184
1.421	18400.5	17750.7	19124.2	28479	15395.2	14437	14499.5	16369	17466	23537.5		15921.8	11714.3	10092.5	16437.2	11330	13009.3	13576	14408.4	17563.5	18184		14947.2	12776.3	14131.3	14187.5	9588.67	10554.3	14439.8	12059	17766.7	18332.5		11465	3987.5	8755.2	8891	6601.33	7626.5	11069.3	6669.33	11690.4	13470.7		5329.33	1915.5	5446.5	7247.67	5230.5
1.521	18571.2	17967.3	19302.8	28560.5	15558.8	14647	14710.8	16531.5	17677.2	23757		16100.5	11833.3	10225.5	16560.6	11440.7	13161	13713.8	14512.2	17709.8	18335.7		15107.4	12900.8	14331	14307	9688.17	10646	14591.8	12163.8	17891.5	18493		11535.5	3997.5	8850.8	8992.5	6666.17	7689.67	11101.8	6721	11748.8	13587		5323.83	1915.5	5463	7314.33	5270.33
1.621	18701.5	18162.3	19465.2	28658	15714.8	14827.5	14889.5	16685.8	17856.2	23927.5		16255	11931.3	10345.2	16671	11537.7	13291.2	13849.5	14603.2	17848	18476.5		15240.2	12998.3	14493.8	14425.8	9768.5	10732.5	14716.2	12240.2	17994.3	18631.7		11600.5	3999.17	8938.8	9083.67	6727.67	7752.83	11118	6769	11800.8	13692.2		5322.17	1916.17	5479.5	7375.67	5305
1.721	18815.5	18335.7	19603.5	28755.5	15834.2	15005.2	15076.5	16824	18035	24082		16401.2	12039.3	10454.7	16781.6	11634.5	13421	13968.8	14681.4	17978	18595.7		15371.4	13123	14649.7	14526.8	9852.5	10807.8	14846.2	12329.4	18097.3	18771		11676.3	4004.17	9012.4	9172	6784	7809.5	11139.8	6815.67	11859.4	13778.3		5329.33	1914	5498.17	7429	5343.33
1.821	18896.8	18487.3	19717.5	28820.5	15951.5	15156.8	15239	16953.8	18181.2	24195.8		16547.8	12115.3	10549.5	16866	11726.5	13545.7	14087.8	14759.6	18092.2	18704.2		15482	13209.7	14790.2	14625	9938.17	10887.5	14970.7	12395.4	18194.8	18881.3		11719.8	4007.5	9086.2	9249.83	6834	7862.5	11145.3	6857.33	11905.2	13864		5323.83	1915.67	5509.83	7478.67	5378.33
1.921	18969.8	18628.7	19790.5	28869.5	16050	15311	15401.5	17067.8	18327.5	24301.8		16669.5	12213	10635.8	16963.8	11815.5	13659.5	14212.8	14837.8	18214	18801.7		15587.8	13307.5	14911.2	14724.3	10010.3	10974	15073.8	12455	18281.5	18988		11768.5	4012.5	9149.8	9323.17	6882	7912.33	11156	6892	11950.4	13935.8		5322.17	1914.5	5524.83	7521.83	5406.5
2.021	19042.8	18769.3	19864	28934.5	16138.8	15443.5	15548	17181.5	18465.8	24382.8		16791.5	12310.3	10719	17035.4	11894.7	13789.7	14329.8	14909	18344	18899.2		15687.6	13399.7	15032.5	14804.3	10082.3	11042.8	15192.8	12521.2	18368.2	19091.2		11801	4012.33	9213.8	9391.33	6930.33	7962.33	11172.3	6927	11996.2	13998.3		5311.33	1914	5540.33	7565.17	5434.83
2.121	19091.5	18888.3	19929	28999.5	16227.5	15571.2	15702.2	17287.2	18587.8	24456		16913.5	12397	10790.3	17133.2	11970.8	13898	14436	14987	18457.8	18996.8		15779	13486.2	15148.7	14896.8	10152.2	11111.3	15301.2	12578.6	18449.5	19183.8		11844.5	4020.67	9267.8	9457.67	6975.33	8006.83	11199.7	6963.67	12041.6	14064.5		5316.67	1915	5546.5	7601.67	5461.33
2.221	19140.5	19007.7	20002	29048	16297.2	15698.5	15824.2	17400.8	18725.8	24513		17018.8	12462	10858.5	17210.8	12052.3	14011.7	14536.2	15058.6	18571.2	19072.7		15855.4	13572.8	15251.2	14971.5	10222.2	11185.7	15420.7	12635.8	18547	19272.7		11871.3	4022.33	9317.6	9517.67	7018.33	8053.5	11199.7	6991.83	12080.6	14123.5		5313.33	1917.17	5560.17	7638.17	5491.33
2.321	19197.2	19116	20042.5	29097	16354	15834	15962.5	17490.5	18847.5	24569.8		17124.8	12559.7	10926.8	17288.8	12134.5	14114.8	14653.5	15123.6	18701.2	19170		15929.6	13654.2	15349.5	15049.7	10292.5	11248.8	15523.3	12689	18617.5	19358		11909.5	4022.33	9373.2	9577.33	7060	8098.5	11215.7	7020	12119.4	14189.7		5309.67	1915.5	5566.83	7671.5	5517.83
2.421	19229.8	19213.7	20083.5	29146	16427	15951	16084.5	17579.8	18977.8	24634.8		17214.2	12635.7	10986.3	17360.4	12203.3	14217.7	14759.5	15195	18799	19251.5		16006.8	13724.7	15436.3	15129.8	10361.3	11321.3	15626.5	12738	18714.8	19442		11936.3	4029	9415	9632.17	7098.17	8141.67	11226.7	7045	12158.6	14232.7		5311.67	1915.67	5578.5	7697.83	5539.5
2.521	19270.2	19300	20123.8	29194.5	16489.5	16078	16214.5	17685.8	19091.5	24691.5		17311.5	12732.7	11048	17444.8	12283.3	14315.2	14857.8	15273.2	18921	19332.7		16072.6	13805.8	15521.2	15208	10437	11383	15724.2	12786.8	18796.2	19532.7		11952.8	4030.67	9463	9692	7139.83	8183.33	11237.7	7071.67	12191.2	14284.8		5308	1913.33	5583.5	7731.17	5566.17
2.621	19303	19408.7	20148.5	29259.5	16554.5	16184.5	16344.5	17775	19221.8	24740.5		17401	12797.7	11101.2	17516.4	12361.5	14418.2	14955.8	15344.8	19034.8	19403.2		16143	13881.8	15614.7	15277	10493.2	11444.5	15827	12831.6	18877.5	19600.2		11985.3	4030.67	9497	9742	7176.17	8224.83	11248.3	7096.5	12230	14317		5306.33	1913.5	5583	7757.83	5589.5
2.721	19351.8	19484.7	20180.5	29308.5	16606.2	16304	16466.2	17864.5	19343.5	24781		17506.8	12895.7	11155.8	17594.6	12438.3	14504.7	15061.8	15416	19132	19489.8		16209.4	13957.7	15694.2	15360.8	10560.2	11515.3	15924.7	12874	18958.8	19689.3		11996.2	4029	9542.8	9790.17	7216	8266.5	11270	7119.67	12269.2	14376.2		5302.67	1916.17	5596.83	7786	5614.33
2.821	19400.2	19571	20213.5	29357	16668.5	16418	16564	17970.2	19457.2	24838		17604	12971.7	11210.8	17678.8	12500.3	14596.8	15160	15487.6	19237.5	19565.8		16262.8	14038.8	15774.3	15433.8	10628.5	11575.5	16027.5	12922.8	19034.8	19756.8		12017.7	4037.33	9580.8	9843.17	7249.17	8302.67	11270	7138	12295	14413.7		5299.33	1915	5605.17	7807.67	5629.33
2.921	19425	19658	20237.8	29405.5	16728.5	16542.8	16685.8	18059.5	19579.5	24886.8		17701.8	13036.7	11262.3	17757	12573.2	14683.7	15271.8	15552.6	19359.5	19647		16324.8	14103.8	15852	15517.5	10690.2	11637.2	16114.2	12965.2	19126.8	19829.7		12028.5	4035.67	9622.4	9893	7289.17	8344.33	11270	7159.5	12327.6	14442.3		5299.33	1913.5	5610.17	7835.83	5657.67
3.021	19481.8	19744.3	20286.2	29470.5	16785.2	16633	16807.8	18156.8	19701.2	24935.2		17783	13123	11313.8	17822.2	12651.7	14775.7	15353.8	15618	19465.5	19728.3		16391	14185	15919.5	15578.2	10753.8	11695.2	16211.7	13007.6	19208	19906.2		12039.3	4037.33	9654.4	9939.5	7322.5	8381	11291.7	7177.83	12367	14490.5		5297.67	1913.33	5615.17	7855.83	5675.83
3.121	19530.5	19831	20310.8	29487	16856	16757.8	16921.8	18262.5	19839.5	24992.2		17880.8	13199	11362	17900	12728.5	14868	15465.2	15695.8	19571	19798.7		16444.6	14250	16006.3	15656.3	10821	11760.7	16309.2	13050.4	19273.2	19984.7		12055.7	4044	9688.4	9984.33	7359.17	8419	11286.2	7197.83	12392.8	14525		5299.33	1912.83	5620.17	7880.83	5699
3.221	19571	19907	20343.2	29535.5	16913	16872.2	17018.8	18352	19953	25049.2		17970	13264	11413.5	17965	12796.2	14954.5	15553	15754.4	19684.8	19880.2		16500.8	14315.2	16079.2	15722.2	10875.3	11813.3	16395.8	13092.8	19365.3	20046.8		12072	4044	9724.2	10031	7390.5	8454	11302.7	7212.83	12431.8	14560.7		5299.33	1914	5621.83	7899	5722.17
3.321	19627.8	19993.7	20367.8	29617	16975	16978.8	17148.8	18449.5	20075	25106.2		18059.2	13350.7	11460	18049.4	12871.2	15035.8	15640.5	15819.2	19790.8	19950.7		16552	14391	16146.5	15805.8	10936.7	11862.8	16493.2	13140	19441.2	20123.5		12077.5	4044	9754.2	10072.7	7425.5	8490.67	11308	7232.83	12464.4	14598.2		5285.17	1912.83	5631.83	7919	5740.5
3.421	19676.8	20069.7	20408.2	29649.5	17037.5	17068.2	17246.5	18555.2	20188.8	25171		18148.8	13415.7	11506.7	18121	12936.7	15106.3	15736	15884.2	19888.2	20031.7		16603.2	14461.3	16212.2	15871.5	10997	11919.5	16574.7	13167.4	19528	20184		12083	4044	9788.2	10120.7	7457.17	8524	11318.7	7247.67	12490.4	14639.3		5290.67	1913	5633.5	7937.33	5762
3.521	19725.5	20145.3	20449	29714.5	17102.5	17182.8	17352	18660.5	20318.8	25228		18230	13491.7	11554.7	18199	13006.2	15182.2	15829	15942.6	19977.8	20113		16661.2	14521.2	16285.2	15942.7	11057	11977.8	16666.8	13209.8	19592.7	20260.5		12093.7	4047.33	9818.2	10159	7490.33	8557.33	11318.7	7266	12522.8	14679.2		5292.33	1916.17	5636.83	7959	5782
3.621	19790.5	20221.3	20481.5	29747	17161.8	17289	17458.2	18742	20424.8	25293		18319.5	13567.7	11598	18257.4	13070.3	15263.3	15913.8	16014.4	20083	20183.5		16710.8	14597.2	16358.2	16014	11117.5	12021.8	16748	13252	19679.5	20331.7		12099.2	4049	9853.8	10205.5	7523.5	8587	11324.2	7282.67	12549	14703.8		5290.67	1914	5641.83	7978.83	5800.33
3.721	19863.5	20319	20522.2	29812	17227.5	17392.5	17563.5	18839.8	20546.5	25357.8		18417	13632.7	11644.5	18322.6	13143.7	15333.7	15999	16073	20172.5	20259.2		16768.6	14651.2	16423.8	16074.7	11174.2	12069.3	16829.3	13286.4	19750.2	20397.5		12104.5	4050.67	9879.6	10248.5	7555	8625.17	11340.5	7296	12581.4	14734.5		5289	1914	5645.17	7997.17	5825.17
3.821	19912.2	20394.7	20571	29861	17297.2	17496.2	17677.5	18937.2	20668.5	25431.2		18498.5	13708.3	11691	18400.6	13197.3	15404.3	16076	16131.6	20262.2	20335.2		16798.2	14716.3	16493.3	16145.7	11223.5	12115	16905.2	13320	19825.7	20463.5		12104.5	4050.67	9909.6	10286.8	7588.33	8653.5	11346	7309.33	12613.6	14764.7		5283.5	1913	5646.67	8013.83	5841.83
3.921	19993.5	20470.7	20611.5	29893	17372.5	17586.2	17783	19043	20790.2	25504.5		18579.5	13773.3	11734.3	18459.4	13272	15474.8	16160.8	16196.6	20359.5	20411		16856.4	14792	16557.3	16211.5	11280.2	12164.3	16997.5	13362.8	19901.5	20529.3		12110	4054	9937.6	10326.7	7616.5	8684.83	11340.5	7322.67	12626.8	14800.7		5289	1913.5	5648.33	8028.83	5861.83
4.021	20058.8	20557.7	20644	29958	17427	17687.8	17872.2	19132.2	20896	25569.5		18652.8	13838.3	11779	18537.4	13331.2	15534.3	16245.8	16248.4	20457	20481.3		16918.8	14846.2	16623.2	16270.3	11331.5	12207	17073.2	13401.2	19961.3	20584.2		12115.5	4052.33	9967.4	10366.7	7648.17	8716.5	11367.3	7337.67	12646.2	14836.3		5280.17	1914	5653.33	8048.67	5878.5
4.121	20115.8	20622.3	20701	30007	17502.8	17774.8	17978.2	19221.8	21017.8	25642.5		18742	13914.3	11825.5	18595.8	13397.5	15599.2	16312	16313.4	20530.2	20557.3		16959.8	14905.7	16687.2	16350.7	11386.5	12260	17159.8	13424.4	20042.7	20648.3		12126.3	4055.67	9991.4	10408.3	7676.5	8744.83	11356.5	7349.33	12685.4	14865.3		5281.83	1914	5651.17	8065.33	5895.17
4.221	20189	20709	20733.2	30056	17572.8	17868	18059.2	19311.2	21123.5	25715.8		18823.2	13968.7	11870.5	18667.4	13458.3	15669.7	16388.8	16365.6	20619.2	20633.2		17008.8	14965.3	16756.8	16400.2	11434.3	12293.2	17225	13462.6	20112.8	20712.5		12115.3	4055.67	10021.4	10446.3	7703.17	8773.17	11367.3	7364	12711.4	14895.5		5280.17	1911.33	5660	8080.17	5915.17
4.321	20246	20784.7	20790	30088	17642.8	17953	18165.2	19408.5	21245.5	25797.2		18913	14044.3	11913.8	18719.6	13515.7	15740.2	16471.2	16430.4	20692.5	20698.2		17056.4	15025	16820.7	16469.8	11479	12328.7	17301	13492	20183.5	20780		12120.8	4057.17	10045.4	10483	7734.5	8799.83	11372.8	7377.33	12730.8	14931.5		5281.83	1912.83	5657.83	8098.33	5935
4.421	20327	20860.7	20822.8	30153.5	17707.2	18038	18262.8	19489.8	21351	25886.2		18986	14087.7	11956.8	18784.4	13572.8	15788.8	16537.5	16476	20765.8	20768.7		17104	15079.2	16888.3	16537.3	11532.2	12378.3	17376.7	13519.6	20248.3	20838.7		12120.8	4058.83	10073	10519.5	7759.33	8828	11367.5	7390.67	12750.4	14944		5274.67	1913.83	5666.67	8111.67	5948.33
4.521	20392	20936.7	20879.8	30186	17780.2	18122.8	18360	19579.2	21456.8	25951.5		19067.2	14152.7	11998.3	18855.8	13628.3	15848.7	16617.5	16515.2	20855.2	20844.5		17149.6	15149.5	16950.8	16596	11585.5	12422.5	17447.2	13560	20324.3	20897.2		12126.2	4062.17	10097	10556	7789.33	8857.83	11383.7	7398.83	12789.4	14985.2		5274.67	1913.5	5668.33	8128.33	5970
4.621	20473.2	21023.3	20928.5	30251	17856	18205.2	18449.8	19668.8	21562.5	26032.8		19140.2	14206.7	12040	18914.4	13680.3	15913.7	16675.5	16586.8	20928.2	20909.5		17197	15203.8	17002.7	16649.2	11628.5	12459.7	17528.2	13585.6	20373	20945.3		12126.2	4060.5	10123	10599.3	7814.33	8882.83	11389.2	7412	12808.8	15014		5271.33	1912.33	5670	8141.67	5986.5
4.721	20530.2	21099	20985.5	30283.5	17923.5	18279.8	18547	19750	21651.8	26122		19221.5	14261	12083.2	18966.4	13741.2	15973.2	16747.5	16632	21009.8	20974.5		17242	15252.5	17072.2	16721	11674.5	12489.3	17593.3	13613	20443.5	21004.2		12131.5	4062.17	10150.8	10632.5	7841	8909.5	11383.8	7425.33	12828.2	15033.5		5278.5	1912.83	5671.67	8156.67	6001.5
4.821	20611.5	21164	21025.8	30332	17990.5	18354.2	18628	19831	21757.2	26187		19278.5	14326	12124.7	19024.8	13793.2	16032.7	16813.5	16684.2	21066.5	21039.5		17291.6	15312.2	17122.2	16776	11711.7	12528.2	17653	13645	20508.3	21057.3		12131.7	4060.5	10170.8	10664.2	7865.83	8932.67	11394.5	7437	12854.2	15067.7		5273	1913.33	5673.33	8171.67	6021.5
4.921	20676.8	21240	21074.8	30381	18068.5	18434.5	18717.8	19912.2	21854.8	26284.5		19359.8	14391.3	12164.5	19090	13850.8	16092.3	16885.5	16723.2	21139.8	21104.7		17328.4	15377.3	17184.5	16829.5	11758.3	12569	17728.8	13679	20568	21110.5		12126.2	4063.83	10194.8	10700.7	7892.5	8959	11399.8	7445.33	12867.4	15098.3		5271.33	1911.17	5671.17	8186.67	6034.67
5.021	20765.8	21315.7	21131.8	30430	18136	18498	18782.8	19985.5	21952.8	26349.8		19433.2	14434.3	12206.2	19142	13906.5	16146.7	16941	16768.6	21213	21175		17369.4	15420.5	17238	16882.7	11801.3	12599	17799.3	13711	20627.8	21169.2		12126.2	4062.17	10220.8	10732.2	7914	8980.67	11394.5	7453.67	12899.8	15116		5265.83	1909.5	5680	8198.33	6049.67
5.121	20830.8	21402.3	21180.2	30462.5	18211.8	18561.8	18888.5	20075.2	22050.2	26430.8		19514.2	14488.3	12242.8	19194	13960.3	16200.7	17013	16820.8	21286.2	21245.5		17421.6	15480.2	17304.3	16939.7	11841.8	12634.5	17864.2	13731.8	20682	21215.7		12137.2	4065.5	10240.8	10768.8	7942.33	9005.67	11405.3	7466.83	12919.4	15134.2		5269.67	1912.83	5674.5	8213.33	6069.5
5.221	20912.2	21467.3	21229.2	30511	18274.2	18633.5	18969.8	20148.2	22123.2	26520.2		19571.5	14542.7	12284.2	19239.2	14001.7	16260.3	17066	16866.2	21351.2	21305.2		17456.2	15523.5	17361.3	16993	11874.5	12671.5	17924	13763.8	20741.5	21272.7		12131.7	4063.83	10264.8	10800.3	7963.83	9025.67	11410.8	7475.17	12938.8	15164.5		5269.67	1912.83	5681.67	8226.67	6084.5
5.321	20985.2	21543.3	21277.8	30544	18354.5	18689	19042.8	20221.5	22228.8	26593.2		19644.5	14586.3	12319	19310.8	14053.7	16314.7	17138	16911.6	21424.5	21370.3		17501.6	15566.7	17416.7	17039.3	11921.2	12694.2	17983.5	13797.8	20795.5	21320.7		12126.2	4062.17	10288.6	10833.3	7987.17	9050.67	11410.8	7485.17	12958.4	15189.5		5264.17	1912.17	5686.67	8238.17	6097.83
5.421	21042.2	21608.3	21334.8	30576	18419.5	18758.5	19124.2	20294.5	22302	26683		19709.5	14629.3	12360.7	19350	14102.5	16358	17193.2	16951	21473	21419		17538.8	15620.8	17467	17096.5	11958.5	12727.7	18043	13814.8	20839	21366.8		12131.7	4065.5	10310.6	10863.3	8008.83	9072.17	11416.2	7491.83	12971.4	15207.3		5262.5	1911.83	5681.17	8253	6109.5
5.521	21115.5	21684.3	21391.8	30625	18495.2	18805.8	19197.2	20359.5	22391.2	26764.2		19774.5	14694.3	12397.2	19408.4	14152.8	16412	17246.5	17002.8	21546.2	21484		17575.8	15669.8	17525.8	17150	11998.2	12766.7	18108	13848.8	20904	21407.7		12120.7	4065.5	10334.6	10898.3	8032	9095.5	11421.7	7506.83	12997.4	15236.3		5264.17	1911.67	5682.83	8266.33	6126.17
5.621	21196.5	21749.3	21432.2	30657.5	18567.8	18866.8	19270.2	20424.5	22464.8	26845.5		19839.5	14748.7	12435.5	19460.6	14201.7	16477.2	17310.2	17048.2	21603.2	21543.5		17625.8	15724.2	17577.7	17196	12037.7	12791.3	18167.7	13867.8	20952.8	21459.3		12131.5	4065.5	10356.4	10926.7	8051.83	9115.5	11426.8	7511.83	13003.8	15255.8		5262.5	1910	5681.17	8277.83	6139.17
5.721	21277.8	21814.3	21497.2	30690	18635.5	18917.5	19343.5	20489.5	22537.8	26934.8		19912.8	14792	12472	19506	14254	16531.3	17347	17087.2	21652	21603		17660.6	15772.8	17629.7	17253	12069.7	12825	18227.2	13886.8	21007	21505.5		12131.5	4068.83	10376.2	10961.7	8075.17	9135.5	11432.3	7518.5	13036.4	15277.3		5260.83	1910.17	5686.17	8289.5	6152.5
5.821	21334.8	21890.3	21538	30706	18705.2	18970.8	19424.8	20554.5	22627.2	27008		19969.5	14835	12505.3	19551.6	14293.5	16580	17408.5	17126.2	21725	21662.5		17688.8	15821.7	17688.7	17293.8	12104	12849.5	18281.7	13919	21055.8	21541		12131.5	4067.17	10398.2	10990	8095.17	9155.33	11427	7525.17	13049.4	15300.7		5255.33	1909.33	5684.5	8302.83	6169.17
5.921	21399.8	21955.7	21595	30755	18770.2	19021.2	19498	20611.5	22684.2	27089		20042.5	14889.3	12541.7	19603.6	14342	16645	17469.8	17165.4	21790	21716.8		17732.4	15864.8	17733.7	17340	12141.8	12888.5	18346.7	13946.4	21110	21592.7		12131.5	4067.17	10418.2	11019.8	8116.83	9175.33	11432.5	7536.67	13062.2	15318.7		5253.67	1910.5	5689.5	8314.5	6180.83
6.021	21481.2	22020.3	21635.5	30804	18835.2	19072	19563	20684.5	22749	27162.5		20099.2	14922	12573.3	19642.8	14389	16693.8	17514.5	17204.2	21846.8	21787.3		17774	15913.8	17785.8	17384.5	12175.8	12911.7	18389.8	13956.8	21153.3	21626.7		12120.7	4068.83	10438	11046.2	8138.33	9196.83	11437.8	7543.33	13088.4	15343.3		5259.17	1909.5	5687.83	8324.5	6197.5
6.121	21546.2	22096.3	21684.5	30820	18916.5	19108.8	19636.2	20741.2	22822.2	27235.5		20156.2	14976.3	12609.7	19694.6	14432.3	16748.2	17567.8	17243.4	21903.5	21825.2		17808.8	15962.3	17835.8	17430.8	12205	12948.5	18454.8	13995.4	21202.2	21667.2		12120.7	4068.83	10456	11079.5	8160	9215	11438	7550	13107.8	15361.5		5248.17	1912.17	5689.5	8337.83	6207.5
6.221	21611.2	22150.3	21724.8	30852.5	18978.2	19157	19693.2	20790.2	22895.2	27316.8		20221.2	15008.7	12643	19746.8	14481	16796.8	17629	17275.8	21968.5	21873.8		17841.8	16000.5	17884.3	17482.5	12240.8	12971.7	18509.2	14014.2	21256.2	21706.5		12126.3	4070.5	10478	11102.8	8176.5	9233.33	11438	7560	13120.8	15374.2		5257.5	1909.33	5691.17	8344.33	6220.83
6.321	21684.2	22215.3	21781.5	30869	19053.5	19207.8	19766.2	20847.2	22960.2	27398.2		20278.2	15063	12679.7	19792.2	14529.8	16856.5	17673.8	17314.8	22025.8	21933.5		17874.8	16043.8	17936.5	17534.2	12278.7	12999.8	18563.5	14033.2	21305	21752.8		12131.7	4068.83	10493.8	11130.8	8196.5	9255	11443.2	7570	13134	15391.8		5248.33	1910	5694.5	8361	6232.5
6.421	21749.2	22269.3	21822.5	30901	19124	19249.8	19823	20896	23025.2	27471.5		20335	15106.3	12709.7	19837.6	14566.2	16905.3	17727	17360.6	22074.5	21993		17920.4	16076.3	17974.2	17573.3	12309.2	13015.8	18617.5	14045.8	21353.7	21797.2		12115.5	4072.17	10513.8	11155.7	8214.67	9269.83	11448.7	7575	13147.2	15409.7		5250.33	1909.5	5687.5	8369.33	6245.83
6.521	21806	22334.3	21879.5	30950	19173	19297.8	19888.2	20952.8	23090.5	27544.5		20400	15149.7	12741.3	19863.8	14613	16964.8	17780.2	17399.4	22139.5	22041.7		17944.8	16124.8	18027.8	17614	12335	13051.2	18666.2	14075.8	21397.2	21824		12120.8	4070.5	10531.6	11187.3	8233	9291.5	11448.7	7583.33	13166.6	15427.7		5252	1908.83	5696.17	8382.67	6260.67
6.621	21863.2	22399.3	21928.2	30966	19243.5	19332.5	19945	21001.5	23147.2	27617.5		20448.8	15182	12774.7	19915.6	14654.7	17024.3	17822.8	17432	22188.5	22090.8		17980	16168.3	18071.2	17658.7	12376.2	13086.7	18720.5	14101.2	21440.3	21864.7		12115.3	4070.5	10551.6	11209	8254.5	9304.67	11454	7590	13192.4	15451.2		5252	1911.17	5696.17	8394.17	6270.5
6.721	21936.5	22464.3	21960.5	30999	19318.8	19364	20002	21066.8	23204.2	27707.2		20513.8	15225.3	12807.7	19961.4	14703.2	17073.2	17875.5	17477.4	22245.2	22145		18006.4	16206.3	18112.8	17703.2	12405	13115	18774.7	14113.8	21478.3	21893		12115.3	4070.5	10571.6	11237.3	8271.17	9324.67	11459.3	7600	13199	15463.5		5252	1910	5697.83	8397.67	6283.83
6.821	22009.8	22508	22001.2	31015	19365	19406.8	20067	21107.5	23245	27772.2		20554.5	15269	12837.5	19993.6	14743.2	17121.8	17918	17510	22293.8	22204.3		18039.4	16255	18164.8	17737.2	12437.5	13136.2	18818	14143.8	21527.3	21930.3		12120.7	4068.83	10589.6	11264	8286.17	9346.33	11464.8	7600	13225	15487		5239.5	1909.33	5696.17	8411	6295.5
6.921	22058.2	22573	22042	31064	19446	19454.8	20132	21180.5	23309.8	27845.5		20619.5	15301.3	12867.3	20033	14791.8	17176.2	17963.2	17548.8	22359	22247.8		18083.4	16293	18209.7	17776.3	12470	13163	18872.2	14156.4	21570.8	21971.5		12110	4072.17	10605.6	11289	8307.83	9359.67	11459.3	7610	13237.8	15494		5239.5	1908.83	5701.17	8420.83	6308.67
7.021	22123.2	22638	22074.2	31064	19508.5	19484.2	20189	21213	23366.8	27926.5		20684.5	15344.7	12902.3	20084.8	14831.8	17230.3	18005.5	17575	22424	22302.2		18109.8	16325.3	18251.5	17817	12499	13187.3	18915.5	14181.8	21614	21992.5		12109.8	4068.83	10621.6	11314	8324.5	9376.33	11459.5	7613.33	13244.4	15510.3		5245	1907.17	5695.67	8429.17	6317
7.121	22180	22703	22131.5	31096	19573.5	19518.5	20237.5	21262	23415.8	27991.5		20733.2	15388.3	12935.5	20117.2	14873.7	17290	18056	17620.6	22464.5	22350.7		18140.6	16379.5	18289	17854.8	12531.5	13226.5	18969.8	14198.8	21657.5	22032		12120.7	4073.83	10641.6	11337.3	8342.83	9396.33	11470.3	7621.67	13264.2	15529.8		5237.83	1907.67	5702.67	8440.83	6327
7.221	22229.2	22735.3	22172	31129	19635.8	19564.5	20302.5	21310.5	23464.2	28064.8		20790	15409.7	12960.3	20143.4	14915.3	17349.8	18109.2	17659.6	22513.2	22388.7		18165	16401.3	18329	17893.5	12567.8	13249.3	19018.5	14215.8	21706.2	22060.2		12104.5	4072.17	10653.6	11360.5	8359.5	9408	11470.3	7625	13283.4	15546		5237.83	1907.17	5702.67	8447.33	6338.67
7.321	22302.2	22789.7	22212.8	31129	19700.8	19598.8	20359.2	21359.2	23513	28129.8		20839	15453	12990.3	20188.8	14967.8	17398.3	18152	17692.2	22570.2	22448.3		18196.2	16450	18374	17932.8	12589.8	13261.5	19067.2	14241.4	21733.2	22088.3		12110	4073.83	10671.6	11383.7	8376	9431.33	11475.8	7631.67	13296.4	15563.8		5239.5	1908.83	5699	8458.83	6348.67
7.421	22351	22854.7	22245.2	31161	19763.2	19636.2	20408.2	21416.2	23570	28194.5		20896	15496.3	13022	20221.2	15002.5	17458	18196.8	17718	22635.2	22491.7		18218.6	16477.2	18410.2	17966.7	12624	13295.2	19116	14258.2	21776.5	22120.5		12115.3	4075.5	10687.6	11407	8391	9444.5	11470.5	7635	13303	15565.5		5239.5	1909.33	5699	8462.33	6362
7.521	22407.8	22908.7	22277.8	31177.5	19825.8	19668	20457	21448.5	23610.5	28276		20936.5	15529	13053.7	20273.4	15043.7	17512.2	18247.2	17750.6	22684.2	22535		18256	16515	18457.3	18011.3	12651.5	13319.7	19159.2	14270.6	21819.8	22152.5		12110	4075.5	10701.4	11430	8409.33	9459.33	11481.3	7644.83	13316	15589		5236.17	1908.33	5700.67	8477.17	6372
7.621	22464.8	22952	22310.2	31194	19888.2	19689	20522.2	21513.5	23675.5	28349.2		21002	15572	13080.2	20293.2	15083.8	17561	18289.8	17802.6	22732.8	22578.7		18278.2	16542	18492	18039.5	12680.7	13341	19202.8	14294.2	21857.8	22186.3		12109.8	4075.5	10719	11448.2	8424.33	9474.33	11481.2	7644.83	13342	15596.2		5229.33	1907.17	5699	8482.33	6377
7.721	22521.5	23006.3	22351	31226	19950.8	19729.2	20562.5	21546.2	23716.2	28422.2		21042.2	15605	13108.3	20338.4	15123.7	17615.2	18335	17822	22798	22621.8		18302.8	16596.2	18533.5	18073.5	12713	13374.7	19257	14298.2	21906.8	22214.5		12104.5	4072.17	10733	11476.3	8441	9489.33	11486.8	7653.17	13355	15612.3		5234.67	1906.17	5700.67	8492.33	6387
7.821	22562.2	23071.7	22391.2	31226	20015.8	19761	20619.5	21586.5	23781	28479		21091	15637.3	13138.2	20377.4	15170.7	17680.2	18377.2	17854.4	22846.8	22659.7		18338.4	16612.5	18573.2	18105.3	12746	13401.5	19300.2	14328	21944.3	22235.7		12093.7	4075.5	10749	11494.7	8457.33	9507.5	11486.7	7658	13361.6	15624.7		5234.67	1906.67	5702.33	8502.33	6400.33
7.921	22627.2	23125.7	22424.2	31242.5	20075.5	19801	20660.5	21651.5	23814	28535.8		21139.8	15670	13168.2	20416.4	15214.2	17723.3	18419.8	17893.8	22903.5	22713.8		18367.2	16661.2	18609.7	18150	12772.7	13426	19343.5	14340.6	21982.5	22266.3		12093.7	4072.17	10765	11516.3	8470.67	9525.83	11481.3	7663	13381.2	15642.5		5236.17	1904.5	5704	8505.67	6407
8.021	22684.2	23169	22448.2	31259	20138	19841.2	20717.2	21684.5	23854.2	28601		21196.8	15702.3	13194.8	20442.4	15255.8	17788.3	18462.5	17932.6	22960.5	22746.5		18383	16677.7	18651.3	18183.7	12803.7	13454.3	19381.5	14351	22014.8	22294.5		12093.7	4075.5	10777	11539.7	8487.33	9539.17	11486.7	7668	13387.6	15655.2		5234.67	1907.17	5704	8515.67	6415.33
8.121	22732.8	23223.3	22497.2	31291	20200.5	19864.8	20774	21733	23911.2	28674.2		21237.5	15746	13223.2	20475	15288.7	17831.7	18504.8	17958.6	23033.5	22800.7		18412	16721	18678.8	18215.7	12834.3	13477.3	19424.8	14374.6	22058.2	22332.2		12093.7	4072.17	10789	11556.3	8502.17	9555.83	11497.5	7673	13400.4	15671.7		5234.67	1907.83	5705.67	8523.83	6430.33
8.221	22773.5	23255.7	22521.2	31307.5	20260.5	19910.5	20830.8	21773.8	23960.2	28747.5		21286	15778	13251.5	20507.2	15330.3	17880.5	18547.2	17978	23066	22833		18449.8	16753.3	18718.8	18244	12856.3	13498.5	19468	14378.6	22096.3	22342.7		12088.2	4077.17	10807	11574.7	8517.17	9570.83	11492.2	7676.33	13413.6	15678.7		5229.33	1903.5	5705.67	8533.83	6435.17
8.321	22830.5	23320.7	22554	31324	20322.8	19942.5	20871.8	21830.8	24000.5	28788		21343	15811	13281.3	20546.4	15375.8	17940	18592.2	18030.2	23123	22882		18463.8	16791.5	18760.3	18281.5	12887.2	13532.3	19506.2	14408.8	22133.8	22363.7		12093.5	4077.17	10823	11598	8533.67	9587.17	11497.3	7681.33	13439.6	15701.8		5229.33	1906.17	5707.33	8542	6445.17
8.421	22879.2	23353.3	22586.8	31324	20380.2	19982.5	20920.5	21879.2	24057.5	28861.2		21383.8	15843	13306.2	20579.2	15418.5	17994.2	18642.8	18049.6	23179.8	22914.3		18492.4	16818.3	18793.2	18309.8	12921.7	13549.8	19560.3	14419.2	22182.8	22402.8		12093.5	4073.83	10834.8	11616.3	8545.33	9603.83	11497.3	7683	13452.4	15701.8		5223.83	1907.83	5707.33	8548.67	6453.5
8.521	22928	23396.7	22619	31356	20436.8	20014.2	20969	21919.8	24106.5	28934.2		21440.5	15865	13334.5	20611.6	15458.7	18053.8	18677	18075.8	23228.5	22957.7		18521.4	16851	18829.5	18347.3	12952.7	13583.7	19603.3	14429.6	22199.2	22426.2		12093.5	4075.5	10844.8	11634.7	8562	9618.83	11492	7688	13459	15707.3		5227.67	1906.17	5707.33	8558.67	6461.83
8.621	22976.8	23450.7	22643.5	31356	20499.2	20054.2	21018	21985.2	24146.8	28991		21473	15897.3	13360.7	20637.4	15493.2	18107.8	18711.5	18101.6	23293.5	22990.3		18535.4	16889	18860.5	18379.3	12983.3	13599.2	19641.5	14446.6	22247.8	22454.3		12093.5	4075.5	10862.8	11656.3	8575.33	9633.83	11492	7694.67	13478.4	15719.8		5216.83	1904.5	5710.67	8562	6468.5
8.721	23041.8	23505.3	22675.8	31372.5	20556.8	20085.8	21066.8	22017.5	24195.8	29056		21538	15940.7	13387.3	20670.2	15533.2	18151.5	18762	18140.6	23342.8	23039.2		18571	16921.5	18895	18407.8	13008.8	13629.3	19679.3	14457.2	22275	22464.7		12088	4075.5	10876.8	11676.2	8588.67	9645.5	11508.2	7699.67	13485	15737.8		5222.17	1904.5	5709	8568.67	6478.5
8.821	23082.2	23548.3	22700.5	31389	20621.5	20126	21123.5	22066.5	24236.5	29113.2		21578.5	15973.3	13415.7	20702.4	15584.2	18216.3	18804.5	18160.2	23391.2	23076.8		18583	16943.2	18931.7	18439.8	13034.7	13648.7	19717.3	14465.8	22302	22497.2		12088.2	4078.83	10890.8	11691.2	8603.5	9662.17	11497.3	7699.67	13491.6	15738		5224.5	1905.67	5710.67	8578.67	6488.5
8.921	23131	23602.7	22732.8	31405	20670.8	20157.8	21164	22115.2	24293.5	29178.2		21627.5	16005.7	13444	20735	15620.2	18259.8	18839	18192.6	23440	23109.5		18611.8	16975.8	18964.5	18471.8	13063.8	13677.3	19766.2	14491.2	22345.3	22523.5		12082.7	4077.17	10904.8	11711.2	8620.17	9678.83	11497.3	7703	13504.4	15761		5220.67	1904.5	5712.33	8582	6495.17
9.021	23171.5	23646	22765.5	31421	20744	20206	21221	22163.8	24334.2	29227		21659.8	16038.3	13469	20767.6	15655	18324.8	18889.8	18225.2	23496.8	23141.8		18626	16997.2	18992	18504	13096	13705.3	19798.7	14501.6	22383.2	22543.2		12077.3	4077.17	10910.6	11731	8633.5	9692.17	11502.8	7709.67	13517.4	15768		5222.17	1906.17	5706.83	8592	6506.83
9.121	23228.5	23689.3	22789.8	31437.5	20793	20246	21278	22204.5	24383	29292		21708.5	16081.3	13499	20806.6	15700.2	18362.7	18921.5	18257.8	23545.8	23185.3		18646.4	17035.5	19026.7	18525	13123.3	13728.5	19847.5	14511.8	22415.8	22559.2		12082.7	4078.83	10926.6	11745.7	8648.5	9705.33	11513.5	7711.33	13537.2	15784.5		5219	1905.67	5712.33	8597	6511.83
9.221	23261.2	23721.7	22814	31437.5	20842.5	20296.5	21318.8	22245	24439.8	29357		21749.2	16103.3	13522.2	20826.2	15747.2	18422.2	18966.5	18290	23602.8	23217.7		18668.6	17067.7	19059.5	18564.5	13161.2	13740.5	19880	14527	22453.7	22584		12082.7	4077.17	10938.6	11762.3	8661.83	9723.5	11513.7	7714.67	13537.2	15786.2		5213.67	1902.5	5712.33	8605.33	6521.83
9.321	23318	23776	22846.8	31454	20915.8	20328.5	21375.5	22310.2	24472.2	29422		21798	16135.7	13547.2	20852	15780	18476.5	19000.8	18316.2	23659.5	23239.5		18700.2	17089.3	19092.5	18585.5	13181.5	13767	19918	14537.6	22491.7	22605.2		12077.3	4078.83	10950.6	11779	8676.67	9736.67	11524.7	7719.67	13550	15797.2		5219	1905.67	5710.17	8610.17	6526.83
9.421	23350.5	23830.3	22871	31470	20967.2	20370.8	21416.2	22350.8	24529.2	29470.5		21830.8	16179	13573.8	20884.8	15819.8	18519.8	19043.2	18342.2	23708.2	23277.3		18720.6	17122.2	19121.8	18617.7	13206.8	13800.8	19961.5	14554.4	22529.3	22619.5		12066.5	4077.17	10962.6	11797.2	8688.33	9753.33	11502.8	7721.33	13576	15809.5		5212	1903	5708.5	8615.17	6535
9.521	23399	23862.3	22887.2	31486	21024.8	20408.5	21464.8	22407.8	24577.8	29535.8		21887.5	16200.7	13603.5	20917	15861.3	18585	19085.8	18361.6	23756.8	23315.5		18741.2	17149	19154.7	18649.8	13239.8	13822.2	19993.8	14565	22551.3	22646		12061	4078.83	10976.4	11812	8703.33	9768.33	11513.8	7724.67	13576	15814.8		5217.33	1906.67	5708.5	8623.33	6543.17
9.621	23456	23906	22911.8	31486	21079	20445	21513.5	22456.5	24626.5	29592.8		21920	16222.3	13625	20923.6	15896.2	18634	19117.8	18394.2	23805.8	23342.3		18759.6	17176.2	19186	18674.5	13272.3	13846.7	20031.7	14567	22589.3	22660.2		12066.5	4077.17	10984.4	11827	8715	9781.67	11519.2	7726.33	13589	15832.8		5210.33	1904	5710.17	8630	6553.17
9.721	23496.8	23949.3	22944.2	31502.5	21139	20501.2	21570.5	22505.5	24683.5	29657.5		21960.5	16255	13653.3	20969.2	15937.7	18688	19152	18413.6	23854.5	23380.3		18778	17197.8	19209.8	18714	13299.8	13873.3	20075.2	14582	22621.8	22686.8		12066.5	4078.83	11000.4	11847	8729.83	9795	11524.5	7729.67	13595.6	15832.8		5224.5	1904	5710.17	8633.33	6561.33
9.821	23537.5	23992.7	22976.5	31519	21190.8	20533	21619.5	22554.2	24724.2	29706.2		22009.5	16298	13678.3	21001.6	15970.7	18731.5	19202.8	18439.8	23911.5	23407.5		18800.6	17230.5	19250	18735.3	13325.2	13901.7	20112.8	14594.4	22654.2	22711.8		12061	4078.83	11010.4	11858.7	8744.83	9813.33	11519.2	7733	13608.6	15845.3		5212	1903	5710.17	8639.83	6566.33
9.921	23578.2	24035.7	22993	31535	21256.5	20583.8	21668	22611	24781	29763		22041.8	16320	13703.3	21027.6	16010.3	18785.5	19236.8	18472	23960	23434.5		18825.6	17251.8	19275.7	18767.2	13354.3	13917.5	20145.7	14616	22692.2	22733.2		12061	4080.5	11018.4	11877	8758.17	9826.67	11524.5	7736.33	13628.2	15850.8		5212	1903.5	5715.67	8646.5	6573
10.021	23627	24090	23017.2	31551	21300	20629.5	21708.5	22668	24829.8	29836.2		22082.8	16363	13730	21047.2	16048.8	18817.8	19271.2	18491.8	24025.2	23472.5		18837.4	17279.3	19307	18794	13383.7	13945.8	20183.3	14620	22719.3	22745.7		12066.5	4078.83	11032.4	11890.3	8768.17	9843.33	11529.8	7743	13641.2	15858		5210.33	1904	5708.5	8651.5	6581.33
10.121	23659.2	24144.3	23041.5	31551	21360	20666.2	21765.8	22700.2	24878.5	29877		22115	16396	13751.5	21086	16090.3	18888.5	19330	18517.6	24074	23499.7		18858	17317	19336.7	18820.7	13414.2	13974	20232.2	14622	22746.3	22766.8		12061	4078.83	11040.2	11907	8779.83	9858.17	11529.8	7743	13641.4	15874.2		5212	1903	5711.83	8656.5	6589.5
10.221	23716.2	24176.7	23058	31551	21420	20714.2	21806	22765.2	24927.2	29925.8		22164	16417.3	13781.3	21112.2	16130.5	18931.7	19345.8	18543.6	24122.8	23526.5		18876.2	17333.5	19362.5	18847	13443.3	13989.8	20264.8	14639.2	22779	22781		12050.2	4075.5	11056.2	11923.7	8796.5	9871.5	11529.8	7746.33	13660.6	15879.5		5212	1903	5710.17	8664.83	6594.33
10.321	23773.2	24220	23090.2	31567.5	21477.5	20757	21871	22822.2	24984.2	29990.8		22196.2	16450	13806.3	21125.2	16163.3	18986	19390.5	18569.6	24163.5	23559.3		18892.6	17354.8	19393.7	18872.2	13470.5	14018.2	20291.8	14649.6	22811.3	22795.3		12050.3	4077.17	11064.2	11937	8811.5	9884.83	11535.2	7748	13667	15886.5		5210.33	1904	5713.5	8668.17	6601
10.421	23797.8	24252.7	23114.8	31584	21534.8	20815.8	21912	22862.8	25041	30047.8		22245.2	16482.3	13833	21157.6	16207.2	19029.2	19422.5	18595.6	24212	23575.5		18911.2	17393.2	19428.5	18898.8	13499.7	14044.8	20329.7	14664.4	22838.5	22821.8		12061.2	4078.83	11074.2	11950.3	8823	9898.17	11535.2	7749.67	13673.4	15888		5210.33	1903	5711.83	8674.83	6607.67
10.521	23846.2	24296	23131	31600.5	21589.2	20866.5	21968.8	22911.5	25081.8	30088.2		22277.8	16504	13857.7	21190.2	16236	19072.7	19456.8	18621.6	24269.2	23607.8		18929.6	17419.8	19450.5	18925.3	13525	14069.3	20356.7	14672.8	22870.8	22828.8		12044.8	4080.5	11086.2	11965.3	8838	9911.5	11535.2	7754.67	13686.6	15898.8		5208.67	1901.33	5711.83	8679.83	6616
10.621	23887	24339.3	23155.2	31600.5	21636	20908.8	22025.8	22968.5	25138.8	30153.5		22310.2	16536.7	13880.8	21203	16274.5	19121.3	19505	18641.2	24317.8	23640.5		18948.2	17436.3	19480.2	18946.7	13552.5	14087	20400.2	14683.4	22898.2	22859.5		12050.2	4078.83	11094.2	11980.3	8844.67	9924.67	11535.3	7754.67	13693.2	15909.8		5210.33	1902.33	5711.83	8684.83	6622.67
10.721	23936	24382.7	23179.8	31616.5	21696	20959.5	22074.5	23041.5	25203.5	30202		22342.8	16569.3	13907.5	21235.8	16314.5	19180.8	19536.8	18667.2	24358.5	23667.5		18973.4	17463.2	19511.3	18978.8	13578.3	14108.2	20438.2	14692	22936	22862.7		12039.3	4078.83	11110.2	11995.2	8859.67	9939.67	11546.2	7756.33	13699.6	15922.3		5207	1901.83	5715.17	8691.5	6629.33
10.821	23976.5	24436.7	23196	31632.5	21753.5	21007.5	22123.5	23074.2	25252.5	30259		22383.5	16601.7	13932.5	21268.2	16354.3	19229.7	19573.5	18693.2	24415.2	23700		18985.2	17485	19540.7	19000	13603.8	14131	20476	14700.6	22963	22883.8		12050.2	4078.83	11114	12006.8	8874.67	9953	11546.2	7761.33	13719	15927.7		5203.17	1902.33	5715.17	8696.5	6636
10.921	24009	24469.3	23228.5	31649	21816	21058.2	22172.2	23139.2	25317.5	30324		22415.8	16634.3	13959	21287.6	16385.5	19262.3	19613.2	18712.8	24472	23710.8		18999.8	17506.8	19566.5	19025.2	13645.5	14152.5	20508.5	14717.6	22990.2	22901.8		12050.2	4080.5	11128	12023.5	8886.17	9964.67	11546.2	7763	13719	15933.2		5201.67	1901.83	5713.5	8701.5	6641
11.021	24065.8	24513	23253	31649	21865.2	21100.8	22221	23179.8	25366.2	30365		22464.8	16656	13984	21313.6	16418.5	19311.2	19648	18726	24512.5	23743.5		19011.8	17533.8	19592.8	19057.3	13663.8	14180.5	20546.5	14721.6	23017.3	22923		12039.3	4077.17	11138	12035	8899.33	9984.33	11546.2	7764.67	13738.8	15940.2		5207	1901.83	5713.17	8708.17	6652.67
11.121	24114.8	24556	23261	31649	21917	21162	22277.8	23236.5	25423	30430		22497	16688.3	14005.7	21333.2	16453	19354.3	19679.8	18758.4	24569.5	23770.5		19045.2	17560.8	19614.8	19087.7	13695	14202	20578.8	14721.6	23050	22931.7		12039.3	4078.83	11148	12048.3	8911	9996	11551.7	7768	13751.8	15951		5207	1901.83	5711.5	8711.5	6657.67
11.221	24155.2	24610.3	23285.2	31665	21974	21202	22326.2	23285.2	25463.5	30478.8		22529.8	16710	14032.3	21359	16485.7	19392.3	19708.5	18777.8	24610	23786.7		19063.6	17582.7	19644.5	19098.2	13717.2	14228.5	20600.7	14744.6	23071.3	22944.2		12034	4078.83	11157.8	12063.2	8924.33	10012.7	11551.7	7768	13758.2	15951		5199.83	1899.83	5716.83	8716.5	6661
11.321	24204	24643	23318	31681.5	22021	21271.2	22383.5	23342.2	25528.8	30527.2		22554	16743	14057.3	21385.2	16525.8	19446.5	19748.8	18810.6	24651	23819.3		19066.8	17599	19674	19123	13748	14251.5	20644.2	14748.6	23104.2	22962		12034	4078.83	11167.8	12076.5	8939.17	10024.3	11551.7	7773	13771.2	15956.5		5208.67	1903	5711.5	8719.83	6671
11.421	24236.5	24675.3	23334.2	31681.5	22078.5	21305.5	22432.2	23399.2	25593.8	30576		22594.8	16764.3	14079	21417.8	16564.2	19495.3	19791	18810.6	24699.5	23830.2		19083.2	17625.8	19695	19156.8	13769.7	14263.5	20676.5	14757.2	23125.7	22978		12039.3	4080.5	11173.8	12089.7	8949	10039.2	11557.2	7771.33	13777.6	15962		5200	1901.33	5711.5	8723.17	6676
11.521	24285	24729.3	23366.5	31697.5	22138.5	21364.2	22489	23456.2	25634.2	30624.8		22627	16797	14102	21430.6	16597	19533	19814.8	18842.8	24756.8	23856.8		19093.2	17658.3	19725.8	19176.3	13804.2	14301	20698.2	14770.4	23163.7	22997.7		12023.3	4080.5	11187.8	12101.3	8964	10052.5	11557.2	7774.67	13784	15969.2		5199.83	1901.33	5718.5	8729.83	6684.33
11.621	24334	24762.3	23374.8	31697.5	22179.8	21425.5	22537.5	23504.8	25699.5	30681.8		22667.8	16840	14128.7	21456.8	16629.7	19576.5	19846.5	18862.4	24797.2	23878.8		19123	17674.8	19750.2	19195.7	13826.2	14318.5	20741.5	14767.8	23190.7	23004.7		12018	4083.83	11193.8	12111.3	8974	10065.8	11557.2	7776.33	13790.6	15969.2		5200	1899.33	5713.17	8734.83	6686
11.721	24358.2	24805.7	23407.2	31730.5	22239.5	21484.2	22586.8	23570	25756.2	30730.5		22692	16862	14152	21476.4	16668	19625.2	19897.2	18882.2	24829.8	23895		19126.2	17696.3	19781.3	19228	13853.7	14339.5	20779.5	14783	23212.5	23024		12023.3	4078.83	11205.8	12127.8	8987.33	10080.8	11557.2	7778	13810.2	15990.8		5194.33	1899.67	5714.83	8738.17	6692.67
11.821	24415.2	24859.7	23415.5	31714	22294.2	21537.5	22651.5	23618.8	25821.5	30779.2		22724.8	16883.7	14175.2	21502.2	16693.8	19657.8	19920.8	18901.4	24886.8	23927.5		19147.4	17718	19806	19243.8	13884.3	14366.3	20806.5	14787	23239.3	23042.2		12018	4077.17	11211.8	12137.8	8997.33	10092.5	11568	7781.33	13810.4	15987		5194.5	1901.33	5713.33	8744.83	6699.33
11.921	24464	24892.3	23440	31746.5	22354.2	21598.8	22692.2	23676	25870.5	30820		22749.2	16916	14201.8	21515.2	16730.5	19712	19955.2	18914.2	24927.5	23938.2		19161.4	17739.7	19829.7	19268.7	13912	14383.7	20833.7	14789	23266.5	23045.5		12012.5	4078.83	11225.8	12152.8	9009	10110.8	11568	7781.33	13829.6	15997.8		5203.67	1901.33	5714.83	8748.17	6706
12.021	24504.5	24924.7	23464.2	31746.5	22406.2	21649.2	22749	23741	25919	30869		22789.8	16949	14226.8	21547.6	16763.3	19755.3	19987	18947	24976	23960		19176	17766.8	19850.5	19295.5	13934	14410.3	20871.5	14803.8	23282.8	23070.5		12012.5	4080.5	11233.8	12159.5	9024	10119.2	11568	7786.17	13823.2	16003.2		5196.17	1900.33	5714.83	8753.17	6712.67
12.121	24553.2	24979	23488.8	31762.5	22453	21691.8	22805.8	23789.5	25984	30917.5		22822.5	16970.3	14246.8	21567.2	16794.5	19798.8	20018.8	18959.8	25025	23981.7		19192.4	17783	19883.7	19311.3	13961.5	14438.7	20898.8	14810.2	23320.7	23083		12012.3	4080.5	11243.8	12176.2	9032.33	10135.5	11573.3	7786.33	13842.4	16004.8		5187.33	1900.83	5716.5	8754.83	6717.67
12.221	24594.2	25011.3	23513	31762.5	22502.5	21752.8	22854.8	23838.2	26032.5	30982.5		22830.5	17003	14270	21599.8	16825.8	19836.5	20045.2	18973	25065.5	23997.8		19207	17799.2	19907.8	19341.7	13989	14450.7	20920.2	14807.8	23347.8	23102.5		12012.3	4080.5	11251.8	12186.2	9045.67	10147.2	11573.3	7788	13849	16010.2		5198.33	1900.33	5716.5	8759.83	6724.33
12.321	24634.8	25054.7	23537.5	31779	22557.5	21814	22911.5	23887	26097.5	31023		22879	17024.7	14294.7	21612.6	16864.2	19880.2	20087.5	18986	25098.2	24025		19221.6	17831.8	19930.2	19366.8	14009.5	14474.2	20969.2	14816.2	23369.3	23105.8		12007	4082.17	11259.8	12197.8	9059	10160.3	11568	7784.67	13862.2	16021		5191	1900.33	5716.5	8763.17	6729.33
12.421	24675.2	25098.3	23545.8	31779	22615	21864.8	22976.8	23952	26154.5	31063.8		22895.5	17057	14318	21632.2	16891.5	19917.8	20119.8	19025.2	25138.8	24030.5		19236	17847.8	19954.5	19388	14036.8	14500.2	20985.3	14833.2	23391.2	23119.8		12012.3	4080.5	11269.6	12209.5	9070.67	10177	11573.3	7789.5	13862.2	16022.7		5187.33	1900.83	5716.5	8768.17	6737.5
12.521	24732	25141.3	23578	31811.5	22655.8	21926	23041.8	24000.8	26219.5	31112.5		22935.8	17078.7	14344.5	21664.8	16924.7	19955.8	20143.2	19038.2	25187.2	24068.2		19239.2	17864.3	19980.7	19407.5	14067.8	14520	21018	14841.8	23423.8	23130.8		12012.3	4080.5	11277.6	12222.7	9084	10190.3	11578.7	7789.5	13875	16028.2		5192.83	1898.67	5716.5	8773.17	6744.17
12.621	24764.8	25184.7	23594.5	31811.5	22713.2	21984.8	23082	24073.8	26284.5	31161.2		22968.8	17100.7	14362.7	21677.8	16959.5	19988.3	20175.2	19057.4	25236	24079.2		19257.8	17891.2	20003.2	19416.3	14089.5	14537.5	21044.7	14841.8	23445.3	23145.2		12007	4083.83	11283.6	12232.7	9095.33	10202	11578.7	7792.83	13881.6	16028		5187.33	1901.33	5715	8776.5	6747.5
12.721	24821.5	25228	23610.8	31811.5	22760.2	22037.8	23131	24122.8	26341.2	31210		22984.8	17133	14387.7	21710.2	16986.8	20037.2	20209.2	19077	25268.8	24090		19278.6	17923.8	20031	19453.8	14115.3	14558.7	21077.5	14850.4	23467.2	23159.3		12001.7	4080.5	11295.6	12242.7	9108.67	10213.7	11573.3	7796.17	13888	16044.5		5192.83	1898.67	5718.17	8781.5	6757.5
12.821	24845.8	25271.3	23643	31811.5	22807.2	22107	23179.8	24163.5	26398.2	31242.5		23017.2	17143.7	14409.3	21716.6	17014.8	20075.2	20241.2	19090	25309	24111.7		19286.6	17929.2	20053.5	19473.3	14141.2	14585.5	21098.8	14845.8	23488.8	23168		11996	4083.83	11303.6	12254.3	9120.33	10230.3	11573.3	7794.5	13901.2	16050		5185.67	1898.17	5718.33	8784.83	6760.83
12.921	24902.8	25304	23667.5	31844	22864.8	22149.5	23236.5	24220.2	26455.2	31299.2		23049.8	17176.3	14436	21743	17046	20113	20262.2	19103.2	25366	24128		19299	17950.8	20076.2	19498	14168.7	14601.3	21137.2	14867.2	23521.2	23178.7		11996.2	4083.83	11311.6	12262.7	9130.17	10237	11578.8	7796.17	13901.2	16050		5191.17	1899.83	5719.83	8788.17	6764.17
13.021	24935.2	25347	23683.8	31844	22903.2	22219	23293.2	24277.2	26512.2	31348		23074.2	17208.7	14452.7	21762.4	17073.5	20150.8	20297	19129	25390.5	24138.8		19309	17972.7	20098.7	19514	14193.8	14629.8	21164.2	14856.2	23532.2	23198.2		11996	4083.83	11319.4	12279.3	9141.83	10253.7	11578.8	7799.5	13914	16051.7		5184	1898.17	5719.83	8791.33	6770.83
13.121	24992.2	25390.7	23716.2	31860	22958	22272.2	23358.5	24334	26577.2	31397		23106.5	17241.3	14476	21788.4	17110	20194.5	20331.2	19141.8	25431.2	24155		19317	17999.5	20122.7	19540.8	14216.2	14640.2	21196.7	14886.4	23553.7	23218		11990.7	4083.83	11327.4	12287.7	9153.5	10263.7	11584.3	7801.17	13933.6	16057		5192.83	1899.83	5719.83	8797.83	6777.5
13.221	25033	25423	23732.5	31860	23001.8	22333.5	23399.5	24382.8	26626.2	31429.5		23114.8	17263	14504.3	21795	17132.3	20226.8	20360.8	19148.6	25472	24165.8		19338	18005.2	20150.7	19547.8	14236.7	14666.8	21234.5	14879.8	23575.5	23218		11990.7	4082.17	11335.4	12299.3	9166.83	10278.7	11573.3	7799.5	13940.2	16062.3		5184	1899.17	5718.33	8797.83	6785.83
13.321	25065.2	25477	23748.8	31876.5	23056.8	22394.8	23472.8	24439.5	26699.2	31478.5		23155.2	17284.7	14522.7	21833.6	17165.3	20275.5	20384.5	19168.2	25512.5	24187.3		19339.4	18032.2	20171.5	19579.8	14265.8	14686.5	21250.8	14888.4	23597.2	23226.7		11996.2	4080.5	11345.2	12309.2	9175.17	10295.3	11589.7	7804.5	13940.2	16073.2		5187.83	1898.17	5720	8802.83	6789.17
13.421	25114.2	25510	23773.2	31876.5	23103.5	22456	23521.2	24496.5	26747.8	31527		23171.5	17317	14541	21833.6	17190.8	20308	20418.8	19187.6	25553.2	24198.3		19362.6	18042.8	20193.8	19599.5	14295.2	14711	21278	14890.4	23629.5	23241		11990.7	4083.83	11353.2	12319.2	9190.17	10308.7	11584.3	7799.5	13953.2	16073.2		5184	1898.67	5721.67	8806.17	6794.17
13.521	25171.2	25542	23797.8	31892.5	23152.8	22514.8	23570.2	24537	26804.8	31559.5		23187.8	17338.7	14570.8	21866.6	17226.2	20340.5	20442.5	19207	25593.8	24214.7		19368.6	18064.8	20214.8	19619	14320.8	14730.5	21316	14892.4	23646	23253.3		11985.2	4082.17	11363.2	12327.5	9200.17	10318.7	11584.3	7802.83	13953.2	16074.8		5185.67	1898.67	5721.67	8811.17	6799.17
13.621	25203.5	25596.3	23821.8	31909	23207.8	22578.2	23635.2	24594	26869.8	31616.5		23220.2	17360.3	14590.7	21873	17258.8	20378.5	20466.2	19220	25634.2	24241.7		19381	18091.8	20230.2	19633.2	14339.7	14742.5	21332.2	14901	23672.8	23248		11985.2	4083.83	11367.2	12339.2	9211.83	10330.3	11584.3	7802.83	13959.6	16078.7		5182.33	1897.67	5720	8814.5	6805.83
13.721	25244.8	25629	23846.2	31909	23244.2	22637	23692	24642.8	26934.8	31648.8		23236.8	17393	14612	21892.2	17279.8	20410.8	20506.2	19233	25667	24247.2		19391	18097.2	20257.8	19658.2	14368.8	14769.2	21364.7	14909.6	23689.3	23278.2		11979.8	4080.5	11379.2	12350.5	9221.83	10343.5	11589.7	7806.17	13979	16091.2		5185.67	1897.67	5721.67	8819.33	6809.17
13.821	25285.2	25683	23871	31909	23293.2	22698.2	23732.5	24708	26992	31697.8		23269	17414.7	14633.7	21918.4	17304	20443.5	20529.8	19252.6	25707.5	24263.3		19405.6	18124.5	20286	19679.3	14391.3	14783.3	21380.8	14918	23710.8	23279.8		11979.8	4083.83	11385	12362.2	9231.83	10355.2	11600.5	7806.17	13979.2	16085.7		5184	1896.5	5720	8821	6814.17
13.921	25334	25726.3	23887	31942	23348	22757	23805.8	24756.5	27057	31730.5		23285.5	17436	14653.7	21931.4	17336.8	20492.2	20553.8	19278.6	25740	24268.8		19409.6	18146	20304.8	19699	14416.3	14811.3	21413.3	14926.4	23737.8	23287		11974.3	4082.17	11391	12368.8	9245.17	10366.8	11589.8	7809.5	13992.2	16096.7		5182.33	1897.67	5721.67	8826	6820.83
15.321	25943.2	26279.7	24228.2	32072	23964.8	23606.2	24577.5	25455.8	27869.5	32266.5		23570.2	17772.3	14937.7	22165.6	17697.2	20936.7	20911	19467	26227.8	24431.7		19551.2	18384.5	20589	19957	14735.3	15069.5	21754.8	14978.8	24003.7	23409.7		11947.3	4083.83	11495	12498.5	9401.33	10539.3	11622.3	7821	14096.4	16154.2		5173.5	1894.67	5721	8869.33	6893.83
16.321	26349.2	26658.3	24463.8	32169	24363.2	24215.8	25114.2	25935.2	28430.2	32599.8		23740.8	17978	15124.2	22302.2	17917	21223.7	21127.8	19584	26512.2	24523.8		19631	18530.7	20769.3	20115	14949	15238.8	21971.5	15023.2	24160.5	23477		11936.7	4083.83	11562.6	12583.5	9500.83	10645.7	11633	7824.17	14141.8	16181.2		5166.5	1893.17	5721	8894.5	6940.33
17.321	26748	27016	24716	32250.5	24724.8	24812	25634.5	26382.2	28967	32884.2		23878.8	18195	15300	22445.2	18129.8	21478.3	21328.8	19694.6	26788.8	24605		19687.8	18671.5	20945	20257.3	15138.5	15408.3	22171.8	15054.6	24317.8	23550		11914.8	4085.5	11622.6	12657.8	9602.33	10753.8	11638.3	7830.83	14200.4	16209.8		5157.83	1891.33	5724.33	8917.83	6985.17
18.321	27130	27363	24959.5	32348	25047.2	25376	26138.2	26805	29470.8	33128.2		24000.8	18379.3	15464.7	22549.2	18311.3	21711.3	21511.2	19792.4	27024	24675.5		19745.2	18796.5	21092.2	20388.8	15325.5	15560.2	22350.7	15077.8	24442.3	23598		11887.7	4083.83	11682.6	12727.8	9697	10851.8	11654.7	7832.5	14259	16238.7		5156.17	1894.83	5720.67	8936	7026.5
19.321	27487.5	27688	25219.8	32445.5	25341.2	25937.8	26626.2	27186.8	29942	33347.5		24090	18541.7	15612.7	22659.6	18488.2	21917.3	21675.2	19889.8	27251.5	24734.8		19790.2	18915.7	21240	20515.2	15491.2	15701.5	22518.8	15107.2	24561.7	23645.8		11860.7	4087.17	11732.2	12785.8	9785	10943.3	11665.7	7837.5	14310.8	16258.7		5150.83	1891	5725.67	8950.83	7066.5
20.321	27804.2	27980.7	25472	32543	25612.5	26462	27089.2	27544.5	30389.2	33534.8		24187.8	18693.3	15747	22744	18635	22107.2	21814.8	19993.8	27454.8	24789.5		19824.6	19029.3	21368.7	20622	15653.8	15835.5	22654.2	15128.2	24675.5	23686.5		11849.8	4087.17	11780.2	12844.2	9873.17	11031.2	11681.7	7844.17	14356.6	16294.3		5150.83	1892.67	5727.33	8964.17	7108
21.321	28105.5	28262.3	25699.5	32640.5	25835.8	26956.8	27503.8	27861.5	30787.5	33713.2		24260.8	18856	15878.5	22815.6	18780.2	22280.3	21944.2	20071.8	27641.8	24848.8		19859.6	19143	21479.7	20710.3	15801	15959.2	22784.2	15155.6	24778.3	23727.7		11833.7	4090.5	11825.8	12892.5	9954.67	11112.7	11687.2	7844.17	14395.2	16334		5142	1892.67	5727.33	8975.83	7144.5
22.321	28398	28511.7	25943	32721.5	26051.8	27430.2	27886	28162.2	31169.2	33859.5		24334	19007.7	15996.3	22900.4	18910.2	22443	22070.8	20149.8	27820.8	24908.3		19879.6	19235.2	21582	20797.5	15939.7	16072.2	22909	15174.4	24886.5	23779		11811.7	4090.5	11865.8	12940.8	10034.2	11192.7	11714.2	7852.5	14434.4	16357.3		5145.83	1889.83	5732.33	8984	7182.83
23.321	28658	28760.7	26162.8	32819.5	26244.8	27863.8	28251.5	28430.2	31518.8	33965.2		24391	19116	16106.2	22952.4	19034.8	22583.8	22176.5	20227.8	27983.2	24962.5		19897.6	19300.3	21674.2	20877.3	16069.8	16180.2	23001	15202.2	24957	23825.3		11779.3	4090.5	11901.6	12975.5	10110.7	11262.2	11719.7	7860.83	14473.4	16398.8		5138.67	1890.33	5735.67	8987.33	7216.17
24.321	28901.8	28977.7	26390.2	32900.5	26416.2	28276.2	28593.2	28690.5	31844	34095.2		24439.5	19246	16204	23010.8	19147.5	22719.3	22271.2	20319	28138	25038.3		19911.4	19386.8	21761	20944.7	16196.5	16287.2	23104	15223	25038.3	23859		11768.3	4092.17	11937.6	13015.3	10180.7	11332	11725	7865.83	14512.6	16443.8		5131.5	1888.5	5735.67	8997.33	7247.83
25.321	29137.2	29172.7	26609.5	32998	26564.8	28669.8	28910	28926.5	32128.5	34209.2		24504.8	19365.3	16303.7	23069.2	19254.7	22849.3	22366.2	20410	28267.8	25114.2		19925.6	19473.7	21839.3	21012.3	16309.3	16372	23185.3	15244	25125	23917.8		11763	4093.83	11973.6	13048.7	10250.3	11396.8	11741.3	7874.17	14545	16492		5131.5	1889.33	5731.83	8999	7279.5
26.321	29332.5	29367.7	26821.2	33079.5	26715.8	29021	29202.8	29129.2	32388.8	34290.5		24529	19462.3	16391.8	23108.4	19357	22957.5	22450.8	20481.4	28422.2	25200.8		19937.2	19538.7	21896	21071.2	16420.8	16460.3	23255.7	15269.6	25195.7	23968		11741.5	4095.5	12001.4	13078.3	10315.2	11456.8	11741.3	7880.83	14584	16528		5131.5	1886.67	5735.17	9000.67	7309.5
27.321	29511.5	29541.3	27000	33160.5	26840.8	29347.8	29487	29324.8	32648.5	34371.8		24585.8	19560.3	16470	23147.2	19446.8	23065.8	22538	20579	28552.5	25287.8		19960.2	19598.3	21955.2	21126.2	16523.5	16539.3	23331.5	15296.8	25271.3	24025.2		11719.5	4095.5	12027.2	13106.5	10381.7	11513.2	11746.7	7890.83	14603.4	16585.5		5129.83	1889.17	5738.5	9002.5	7337.33
28.321	29690.2	29692.7	27195	33242	26960.8	29661.5	29722.8	29503.2	32876	34444.8		24618.5	19657.7	16544.7	23186.6	19528	23158.2	22603.5	20663.2	28674.2	25379.8		19963.8	19652.7	22016.2	21172.3	16617.7	16619	23391.2	15326.6	25330.8	24083.7		11698	4098.83	12055.2	13129.8	10439.7	11566.3	11768.3	7902.5	14629.4	16641		5128.17	1886.67	5740.17	9002.5	7370.5
29.321	29844.8	29844.7	27365.8	33323.5	27067.2	29951.2	29966.5	29681.8	33103.5	34501.8		24651	19733.3	16619.3	23225.4	19616.8	23244.7	22664.2	20774	28812.2	25493.3		19965.2	19717.3	22072	21224	16713.8	16693	23456.2	15360.4	25401.3	24135.2		11692.5	4098.83	12079	13151.5	10496.3	11616.2	11762.8	7917.5	14655.4	16700.2		5126.5	1889.33	5741.83	8999.17	7397.17
30.321	29999	29985.7	27544.5	33404.5	27174.2	30224.8	30186	29836.5	33291	34567		24683.2	19831.3	16687.5	23258	19699.8	23331.7	22733	20878	28942.2	25607.3		19969.2	19771.5	22117.2	21259.3	16800.8	16767.2	23510.5	15385.8	25466.5	24210.3		11670.8	4100.5	12100.8	13174.8	10552.7	11667.8	11768.3	7929.17	14688	16773.3		5121	1888.67	5741.83	9000.83	7428.83
31.321	30129	30115.7	27691	33469.5	27265.2	30485.2	30381	29991	33478	34632		24707.8	19907.3	16749	23290.2	19777.7	23407.5	22801.5	20975.6	29064.2	25726.7		19977.2	19820.3	22162.2	21305.5	16885	16835.7	23553.7	15422	25531.5	24278.3		11660.2	4097.17	12120.8	13191.5	10605.8	11712.7	11790.2	7945.83	14701	16834.2		5115.67	1884.5	5741.83	8997.5	7453.5
32.321	30275.2	30235	27837	33534.5	27345.8	30716.8	30560	30121	33648.5	34713.2		24740.5	19983	16807.3	23316.4	19854.3	23488.7	22843.2	21086	29178	25872.8		19983.2	19869.2	22200.3	21339.3	16965.5	16897.3	23602.3	15451.4	25591	24344		11644	4100.5	12136.8	13203.2	10652.5	11759.2	11795.5	7960.67	14720.4	16902		5119.33	1888.17	5743.33	8995.83	7478.5
33.321	30389	30343.3	27983	33616	27432	30937	30747	30234.8	33810.8	34753.5		24772.8	20048	16863.8	23342.4	19928.8	23553.7	22901.8	21196.6	29308.2	26013.7		19993.2	19912.5	22235	21378.5	17035.8	16959	23645.8	15492	25645.3	24424.3		11633.2	4100.5	12156.8	13223.2	10703.8	11798.8	11795.5	7977.33	14746.6	16973.7		5114	1884.5	5741.33	8995.83	7505.17
34.321	30486.8	30451.3	28105	33681	27509.8	31147.2	30917.5	30364.8	33973.2	34818.8		24805.5	20124	16915.2	23368.4	20000	23624.2	22957.2	21346.2	29446.2	26170.8		19997.2	19950.3	22262.7	21412.2	17118	17006.5	23683.8	15536.2	25710.3	24490.2		11600.3	4105.5	12168.8	13239.7	10755.3	11842	11811.8	7994	14766	17030.7		5114	1884.5	5741.33	8994.17	7530.17
35.321	30592.2	30559.7	28243.5	33746	27593.8	31327.5	31055.8	30478.8	34103.5	34867.8		24838	20189	16968.3	23407.6	20062.3	23678.3	22999	21456.8	29568.2	26333.3		19996.8	19999.2	22294.2	21449.8	17182.7	17072	23716.2	15572.4	25759	24581.3		11595	4105.5	12188.8	13256.3	10800.3	11878.7	11817.3	8012.17	14792	17111.3		5105.33	1886.67	5743	8994.17	7560.17
36.321	30706	30636	28357.2	33811	27656.2	31524.5	31218	30592.2	34241.8	34932.8		24854.2	20232.3	17016.7	23420.4	20131.8	23743.3	23043.8	21580.4	29690.5	26501.2		20004.8	20042.5	22321.5	21472.5	17260.2	17121.2	23759.5	15608.2	25823.8	24663.5		11589.5	4105.5	12198.8	13266.3	10848.7	11913.7	11811.7	8033.67	14811.4	17195.3		5117.67	1884	5746.33	8995.83	7590.17
37.321	30795.5	30733	28479.2	33876	27729	31683.8	31340	30681.8	34363.5	34989.5		24894.8	20297.3	17064.8	23433.6	20192.7	23797.5	23091.5	21723.2	29812.2	26674.8		20008.8	20075	22351.2	21497.7	17320.2	17173.8	23781.5	15652.6	25900	24758		11573.5	4107.17	12212.8	13276.3	10890.2	11948.7	11817.2	8053.5	14824.4	17274		5109	1886.17	5748	8990.83	7615
38.321	30885.2	30809	28593	33941	27802	31843	31470.2	30787.5	34493.5	35046.2		24919	20373	17104.8	23466	20249.3	23846	23144.5	21859.8	29950.5	26864.7		20021.2	20118.2	22372	21536.8	17385.2	17219.7	23835.5	15701.6	25948.7	24849.3		11567.8	4110.5	12224.8	13291.3	10935	11982	11827.8	8073.33	14844	17339.7		5109	1884.67	5749.67	8990.83	7639.83
39.321	30974.5	30895.7	28698.8	33990	27851.2	31999.8	31592	30876.8	34607.5	35103.2		24935.5	20427	17151.3	23485.4	20326.5	23900.3	23189.5	22002.8	30088.5	27048.5		20027.4	20161.7	22390.7	21565	17448	17267.2	23857	15746.4	26002.8	24938.2		11562.7	4110.5	12234.8	13304.7	10976.3	12016.8	11838.8	8096.67	14850.4	17431.2		5109	1886	5751.33	8994	7666.33
40.321	31047.5	30971.3	28796.2	34038.5	27911.2	32148.5	31705.8	30950	34721.2	35168.5		24960	20470.7	17191.2	23511.6	20369.7	23954.7	23215.8	22152.6	30202.2	27233		20033.2	20183.5	22418.7	21584.5	17506.5	17311.3	23889.5	15797.4	26078.7	25038.7		11551.8	4108.83	12244.8	13316.3	11021.2	12051.8	11828	8116.67	14863.4	17500.7		5096.67	1884.5	5753	8997.33	7689.67
41.321	31112.5	31036.3	28877.5	34087	27968.8	32275.8	31803.2	31039.2	34835	35233.5		24984	20535.7	17237.5	23537.6	20434	23992.7	23263.5	22289.2	30348.5	27427.8		20045.6	20226.5	22444.7	21613	17564.8	17351.7	23922.2	15846.4	26127.5	25133		11541	4112.17	12256.8	13326.3	11059.5	12076.7	11844.2	8140	14889.6	17570.5		5103.67	1886.33	5754.67	8997.33	7716.33
42.321	31185.8	31112.3	28967	34136	28028.8	32403.2	31925.2	31129	34924.5	35290.2		25008.8	20578.7	17274.2	23557	20491.3	24046.8	23305.8	22445.2	30486.5	27623		20058	20259.2	22461.8	21638.2	17624.8	17399.3	23943.8	15892.4	26203.3	25226		11535.5	4112.17	12266.8	13341.2	11099.3	12106.2	11833.3	8164.83	14896	17643.8		5096.67	1884.5	5754.67	8994	7741.33
43.321	31250.5	31177.3	29056.2	34185	28088.8	32530.8	32006.5	31202	35014	35363.2		25041	20633	17312.3	23583	20545	24090.3	23342.5	22594.6	30616.8	27812.3		20063.8	20291.8	22484.2	21663	17683.3	17439.7	23971	15950	26252.2	25320.5		11524.5	4112.17	12272.8	13352.7	11136	12136	11844.2	8186.5	14909	17729.5		5096.67	1883.83	5754.67	8995.67	7766.33
44.321	31324	31253.3	29153.8	34233.5	28135.5	32628.8	32112.5	31283	35111.5	35436.5		25073.8	20687.3	17349	23602.8	20611.2	24128	23381.8	22750.6	30771	28023.8		20076.2	20324.2	22503.5	21695.2	17735	17473	24008.8	15988.2	26322.7	25425.8		11519.2	4112.17	12286.8	13362.7	11176	12167.7	11855.2	8209.67	14928.6	17806		5096.67	1882.33	5756.33	9000.67	7792.83
45.321	31389	31286	29210.8	34282	28193	32745.5	32201.8	31348.2	35201	35493.5		25090	20719.7	17385.3	23628.4	20661.5	24176.8	23424.5	22894	30893	28219		20088.8	20356.8	22519	21716.3	17791.3	17515	24036.2	16045.6	26382.3	25520.5		11513.8	4117.17	12292.8	13377.7	11214.2	12192.7	11866	8233	14928.4	17870.5		5096.67	1884.5	5759.67	9004	7816
46.321	31454	31362	29292	34315	28247.8	32859.8	32274.8	31421.5	35290.5	35566.5		25114.2	20795.3	17427	23654.6	20713.7	24220.2	23475	23049.8	31055.5	28419.7		20101.4	20394.7	22539.7	21754	17830.5	17560.7	24068.5	16094.6	26452.7	25620.5		11513.8	4118.83	12300.6	13392.7	11249	12222.7	11866	8256.33	14941.4	17952.3		5096.67	1883.5	5761.33	9007.33	7842.5
47.321	31494.5	31405.3	29365	34380	28289	32955.5	32356	31494.5	35363.5	35655.8		25138.8	20828.3	17463.7	23661.2	20767.8	24247.2	23519.8	23206	31194	28603.7		20115.8	20416.5	22564.3	21768.2	17889	17598	24079.3	16145.8	26517.7	25709.7		11503.2	4120.5	12306.6	13402.7	11282	12246	11860.5	8279.5	14960.8	18015		5096.67	1885	5761.33	9007.33	7867.33
48.321	31559.5	31470.3	29422	34412	28341.5	33051	32437.5	31559.8	35436.8	35728.8		25163	20871.3	17498.7	23693.4	20827	24296.2	23551.2	23348.8	31340	28793.3		20130.2	20465.2	22581.3	21794.7	17936.8	17633	24117.3	16196.6	26588	25809.7		11503	4117.17	12314.4	13416	11317	12274.3	11860.5	8301.17	14967.4	18089.8		5093.33	1884.5	5757.5	9014	7894
49.321	31624.5	31524.3	29495	34445	28396.5	33144.2	32518.5	31616.5	35525.8	35802.2		25187.5	20925.7	17535.2	23726.2	20882.7	24344.7	23593.8	23492.2	31478.5	28994		20142.8	20492.2	22598.2	21810.7	17990.2	17666.2	24144.3	16241	26647.7	25915		11513.7	4123.83	12320.4	13429.2	11357	12301	11865.8	8329.5	14980.4	18166.5		5096.67	1884	5761.33	9024	7922.33
50.321	31673.2	31578.7	29552	34477	28435	33223.8	32575.5	31689.5	35607.2	35875.2		25211.8	20958.3	17573.5	23732.6	20925.8	24372	23636	23628.6	31624.5	29167.3		20150.8	20530.5	22619	21846.3	18033	17706.7	24171.5	16305	26707.2	26008		11503	4123.83	12326.4	13439.2	11387	12326	11865.8	8352.83	14999.8	18229		5096.67	1884	5759.17	9025.67	7947.17
51.321	31713.8	31632.7	29608.8	34510	28487.5	33314	32648.5	31754.5	35672.2	35956.5		25244.5	21012.3	17606.3	23752	20988.8	24426.3	23662	23771.4	31778.8	29346		20178.4	20562.7	22643.7	21867.7	18086.3	17738	24193.3	16353.8	26772.3	26097.2		11497.7	4122.17	12334.4	13452.2	11423.7	12354	11876.7	8376.17	15006.4	18298.5		5095	1883.5	5759.17	9030.67	7972
52.321	31763	31676	29665.5	34542	28534.5	33390.8	32713.5	31819.5	35761.2	36054		25244.5	21055.7	17642.8	23778	21042.8	24442.3	23723.5	23895	31917.2	29514		20193	20606.2	22664.3	21881.8	18130.7	17767.5	24214.7	16390	26837.3	26191.5		11492.3	4125.5	12340.4	13468.8	11453.5	12374	11871.2	8397.83	15013	18355.7		5095	1884.33	5760.83	9039	7995.33
53.321	31811.8	31719.3	29722.5	34575	28576.5	33457.2	32778.8	31884.5	35826.5	36135.5		25276.8	21110	17681.2	23804.2	21089.5	24491	23758	24031.6	32063.2	29671.2		20209.4	20627.8	22679.8	21912.2	18172	17808	24258.2	16441	26896.8	26284.5		11497.8	4125.5	12350.4	13485.5	11490	12398.8	11876.7	8425.83	15019.6	18418		5096.67	1882.83	5762.5	9044	8023.67
54.321	31860.5	31763	29763.5	34607.5	28623	33542.2	32843.8	31941.8	35883.5	36233		25309.5	21153	17721.2	23830.2	21142	24529	23811	24155	32209.8	29833.8		20236.2	20649.3	22706	21938.8	18218.7	17852.2	24279.8	16489.8	26962.2	26377.3		11497.7	4127.17	12356.4	13495.5	11523	12423.8	11882.2	8445.83	15039	18484		5096.67	1883.33	5762.5	9055.67	8048.67
55.321	31917.2	31817	29820.2	34624	28664.8	33608.5	32900.8	32006.8	35956.8	36314.5		25333.8	21196.7	17761.2	23843.2	21199.3	24572.5	23848	24278.6	32347.8	29991		20248.8	20698	22730	21953	18264.7	17885.5	24306.8	16547.4	27027	26466.7		11497.5	4128.83	12366.4	13507.2	11558	12452	11882.2	8468.83	15052	18541		5095	1883.5	5762.5	9059	8073.67
56.321	31958	31860	29869	34656	28706.8	33672	32957.5	32071.8	36030	36411.8		25350	21239.7	17797.8	23862.6	21246.3	24605	23898.5	24395.8	32469.5	30137.3		20273.6	20730.8	22756.3	21972.7	18299	17920.5	24328.7	16596.2	27086.7	26559.5		11503.2	4128.83	12370.4	13523.8	11588	12473.5	11887.7	8488.67	15058.4	18598.2		5093.33	1881.67	5764.17	9070.67	8100.33
57.321	31998.5	31903.7	29925.8	34705	28751	33735.8	33006	32144.8	36103.2	36517.8		25374.5	21261.7	17834.3	23888.8	21300.3	24637.5	23935.2	24512.8	32616.2	30272.7		20296.6	20757.7	22778.8	22017.3	18347.2	17955.5	24355.7	16639	27146.2	26643.2		11514	4128.83	12380.2	13537.2	11616	12496.8	11887.7	8510.33	15065	18655.2		5093.33	1884.5	5767.5	9075.67	8126.83
58.321	32039	31936	29958.5	34737.5	28784.5	33799.5	33071	32193.2	36168	36623.2		25398.8	21337.3	17877.3	23914.6	21343.8	24681	23990.8	24617	32746.5	30408		20328.2	20795.7	22794.3	22024.3	18388.3	17987	24388.2	16686	27205.8	26736.2		11519.2	4132.17	12384.2	13552	11651	12523.5	11882.2	8538.67	15071.6	18701.3		5093.33	1884.33	5765.83	9085.67	8150
59.321	32079.8	31979.7	30015.2	34754	28831.5	33863.2	33112	32258.5	36233	36712.8		25431.2	21370	17913.8	23927.6	21397.8	24724.2	24033.2	24721	32884.2	30532.7		20355	20817.2	22829.2	22058	18431	18027.5	24415.3	16735	27254.5	26812.8		11519.2	4135.33	12390.2	13565.3	11677.7	12546.8	11893	8557	15084.6	18769.5		5095	1884	5767.5	9095.67	8178.33
60.321	32112.5	32023	30047.8	34770	28873.5	33927	33169	32315.8	36289.8	36818.2		25463.8	21424.3	17960.3	23966.6	21453.7	24762.2	24078.2	24825	33006.2	30662.7		20375.6	20860.8	22851.8	22072.3	18477.5	18057	24442.3	16764.4	27319.8	26895.2		11535.7	4133.67	12396	13582	11711	12573.3	11898.3	8580.33	15097.6	18821		5093.33	1884.67	5769.17	9107.33	8203.17
61.321	32161.2	32066	30088.8	34786	28904.5	33980	33209.2	32380.2	36371.5	36915.8		25463.8	21467.3	17998.7	23979.8	21500.7	24789.2	24131.5	24922.4	33128.2	30776.5		20400.6	20887.8	22876	22090	18513.5	18086.7	24469.3	16826.2	27373.7	26980.7		11530.2	4137	12404	13593.7	11742.7	12596.7	11898.3	8600.33	15110.4	18865.7		5093.33	1885	5767.5	9114	8226.33
62.321	32193.2	32099	30129	34819	28946.2	34035.5	33266	32445.5	36436.5	37029.8		25504.5	21511	18042	24005.6	21554.8	24832.3	24187.2	25013.6	33242	30890.5		20435.8	20920.3	22905.5	22116.8	18553	18130.7	24491	16860	27433.5	27057.3		11540.8	4135.33	12412	13610	11772.7	12623	11898.3	8621.83	15117	18915.7		5096.67	1884.83	5769.17	9125.5	8251.17
63.321	32242.2	32131	30161.8	34851	28977.5	34088.8	33315	32510.5	36509.2	37135.2		25536.8	21565	18088.5	24031.6	21609	24875.8	24237.8	25124	33364	31004		20458.4	20952.8	22940.3	22148.8	18592.3	18164	24523.5	16902.8	27487.5	27139.5		11546.3	4137	12418	13628.3	11802.7	12649.7	11903.8	8643.5	15123.6	18967.2		5093.33	1885.17	5767.5	9142.17	8279.5
64.321	32266.5	32164	30202.2	34851	29011.2	34133.8	33355.8	32575.5	36566.2	37248.8		25545	21597.7	18131.7	24051.2	21664.7	24919.2	24290.8	25189	33485.8	31107		20494	20990.8	22970.2	22164.7	18628.7	18197.2	24550.7	16941.2	27541.7	27209.2		11562.7	4137	12424	13640	11833.7	12674.7	11898.3	8660.17	15136.6	19011.7		5087.83	1881.17	5769.17	9150.5	8302.67
65.321	32299.2	32196	30251.2	34867.5	29053.2	34184.2	33404.8	32640.5	36631.2	37362.8		25577.5	21651.7	18179.8	24077.2	21708	24973.3	24335.8	25286.8	33591.2	31199.2		20529.2	21017.7	22988.7	22187.8	18666.7	18239.3	24572.5	16981.8	27590.5	27278.7		11562.5	4138.67	12432	13656.7	11862	12696.3	11898.3	8678.5	15156	19051		5093.33	1885.5	5770.83	9162.17	8327.67
66.321	32331.5	32229	30259.5	34900	29094.8	34229.2	33437	32705.5	36704.5	37460.2		25601.8	21695	18224.5	24103.2	21765.7	25000.7	24393.8	25371	33697.2	31296.7		20560.2	21050.5	23023.5	22213	18707.8	18268.8	24610.2	17024.4	27639.3	27353.5		11578.8	4142	12442	13671.7	11890.3	12722.8	11903.8	8700.17	15156	19090		5091.67	1882.17	5770.83	9173.67	8352.67
67.321	32380.5	32261	30291.8	34916.5	29123.5	34279.8	33485.8	32770.8	36769.8	37598.5		25634.5	21749.3	18272.7	24129.2	21814.5	25038.7	24447	25442.6	33819.2	31383.5		20597.8	21088.3	23058.3	22234	18745.7	18313.2	24632	17069.2	27698.8	27412.2		11578.8	4140.33	12448	13689.8	11917	12749.5	11903.8	8720.17	15162.6	19127.7		5086.17	1885	5769.17	9187	8379.33
68.321	32404.8	32315.3	30340.5	34916.5	29157.2	34325	33518.5	32835.8	36834.8	37704.2		25658.8	21792.7	18321	24155	21865.3	25092.7	24492	25520.6	33924.8	31470.2		20635.2	21110	23095.2	22261	18785	18342.5	24669.8	17103.4	27742.3	27487.3		11600.7	4142	12460	13703.2	11948.7	12774.3	11909.2	8738.33	15169.2	19172		5091.67	1882.83	5774.17	9203.5	8400.83
69.321	32429	32337	30356.8	34949	29188.5	34375.5	33567	32892.2	36899.8	37809.8		25683.5	21847	18372.7	24181.2	21917.3	25130.7	24555.8	25592	34022.5	31551.3		20670.2	21148	23128	22280.3	18815.8	18384.7	24697	17137	27796.3	27557		11606	4142	12467.8	13721.5	11978.3	12801	11914.7	8758.33	15175.6	19216.7		5082.33	1885.67	5775.83	9213.5	8427.5
70.321	32461.8	32369.7	30389.2	34965.5	29225.2	34401.8	33616	32965.5	36972.8	37932		25707.5	21890	18422.5	24194.2	21976.8	25179.3	24611	25663.6	34127.8	31627.3		20705.2	21180.3	23159.3	22312.7	18859.2	18428.8	24724	17177.8	27834.3	27625		11616.8	4143.67	12475.8	13738.2	12008.3	12831	11920.2	8775	15201.4	19254		5093.33	1884.5	5770.83	9231.67	8452.5
71.321	32486	32402	30421.8	34981.5	29253.5	34452.2	33648.5	33030.5	37037.5	38045.5		25732	21934	18475.7	24226.6	22022.3	25222.8	24656	25728.6	34217.5	31703.2		20750.8	21213.2	23193.8	22333.7	18898.5	18458.5	24762.2	17203.2	27883	27683.7		11633	4142	12485.8	13753.2	12036.7	12857.5	11925.7	8792.83	15208	19293.3		5089.5	1884.5	5775.83	9241.67	8475.83
72.321	32518.5	32445.3	30438	34997.5	29290.2	34481	33689	33103.8	37102.5	38159		25756.2	21988	18532	24246	22076.5	25266	24720	25800.2	34306.8	31768.2		20790.4	21245.3	23225.2	22364.2	18929.5	18493.3	24783.8	17237.2	27931.8	27746		11643.8	4145.33	12495.8	13769.8	12065	12882.5	11909.3	8812.83	15214.6	19325.5		5087.83	1885.67	5775.83	9258.33	8499
73.321	32567.2	32478	30486.8	35014	29329.8	34537.2	33721.8	33177	37183.8	38281.2		25789	22042.3	18588.5	24272.4	22136	25325.7	24783.5	25858.6	34396.2	31838.5		20834	21283.5	23265	22378.3	18968.8	18546.2	24821.5	17282.2	27980.8	27808.5		11649.5	4148.67	12501.8	13788.2	12091.5	12910.7	11925.7	8829.5	15227.6	19368.5		5087.83	1885.67	5779.17	9273.17	8523.83
74.321	32591.8	32499.7	30502.8	35046.5	29350.2	34569.2	33746	33242	37240.8	38403.2		25821.2	22085.3	18640.2	24298.2	22183	25369	24836.8	25917.2	34493.8	31909		20877.4	21305	23300	22405.2	19003.5	18575.7	24837.8	17301.2	28023.8	27865.5		11665.5	4145.33	12513.8	13804.7	12123.2	12932.3	11931	8849.5	15240.4	19384.3		5086.17	1884	5775.83	9286.5	8548.67
75.321	32616	32532	30527.5	35046.5	29392	34598	33778.5	33307	37305.8	38508.8		25854	22129	18698.2	24337.2	22231.7	25417.7	24895	25969.4	34575	31963.5		20921	21337.5	23346.8	22426.2	19034.3	18603.7	24876	17339.8	28067.3	27911.7		11676.3	4147	12523.8	13823	12149.5	12965.5	11914.8	8862.67	15234	19434.2		5087.83	1885.67	5775.83	9299.83	8572
76.321	32640.5	32564.7	30551.8	35046.5	29410.2	34638	33827	33372	37387.2	38630.8		25870	22172.3	18753	24350.2	22285.7	25472	24950	26027.8	34648.2	32023		20955.4	21375.5	23379.8	22451.5	19076	18649.7	24902.8	17365.4	28116.2	27968.8		11692.7	4147	12535.8	13838	12176	12993.8	11920	8877.67	15247.2	19459.3		5082.33	1885.67	5779.17	9314.83	8593.67
77.321	32672.8	32586.3	30576	35062.5	29439	34661.8	33851.8	33461.5	37444	38752.5		25902.8	22215.3	18812.8	24382.8	22334.3	25509.8	25003.2	26079.6	34737.5	32082.5		21007.6	21397.2	23417.7	22481.7	19110.5	18691.5	24940.8	17399.2	28148.5	28019		11703.3	4148.67	12545.6	13856.3	12204.3	13018.7	11931	8892.67	15253.8	19485.8		5087.83	1885.67	5779.17	9333.17	8620.17
78.321	32697.5	32619	30592.5	35095.5	29467.5	34712.2	33876	33526.5	37517	38866.5		25927	22259	18871	24402.4	22388.7	25574.8	25051	26131.8	34810.8	32136.5		21046.4	21424.2	23461.5	22501.2	19146.7	18732	24967.8	17431	28186.5	28070.5		11719.8	4150.33	12557.6	13871.2	12231	13048.5	11931	8906	15279.6	19523.3		5075.17	1883.33	5777.5	9351.33	8641.83
79.321	32721.8	32640.3	30624.8	35095.5	29498.8	34736	33916.8	33591.8	37574	38972		25975.8	22324	18934.3	24434.6	22444.8	25629	25114.8	26177.4	34883.8	32179.8		21092.2	21462	23508.7	22522.3	19177.5	18772.3	25000.5	17460.8	28224.3	28120.3		11736	4150.33	12571.6	13894.5	12261	13073.5	11930.8	8922.67	15286.2	19548.2		5086.17	1884.5	5779.17	9366.33	8668.5
80.321	32746	32673	30657.5	35095.5	29530	34767.8	33949	33656.8	37647.2	39069.5		26000	22367	18994.2	24460.8	22493.7	25677.7	25181.2	26222.8	34948.8	32234.3		21144	21489.3	23541.3	22552.7	19210	18798.7	25022.2	17480	28273.2	28177.5		11741.7	4152	12583.6	13906.2	12289.3	13104.8	11936.3	8939.33	15286.2	19578.8		5087.83	1885	5780.83	9384.67	8686.83
81.321	32770.5	32705.3	30665.5	35127.5	29556.2	34799.8	33981.8	33729.5	37728.5	39199.8		26032.8	22410.3	19050.5	24480.4	22547.7	25731.8	25231.2	26281.4	35030.2	32277.5		21191.4	21521.7	23593.7	22584.8	19239.2	18853.2	25060	17516.6	28311.2	28216.8		11773.7	4152	12595.4	13925.8	12316	13128.2	11930.8	8952.67	15292.6	19605.5		5082.33	1886.67	5780.83	9399.5	8710
82.321	32786.8	32716	30689.8	35111.5	29587.5	34834	33989.8	33794.5	37793.5	39297		26057	22454	19113.7	24506.2	22596.2	25786.2	25289.5	26327	35095	32337		21234.6	21548.8	23630	22600.8	19278.8	18880.8	25087.2	17542	28338.2	28261.5		11773.8	4152	12609.4	13945.8	12340.8	13156.5	11930.8	8967.5	15312.2	19630.5		5082.33	1885	5784.17	9417.83	8733.17
83.321	32819.5	32759.7	30706	35127.5	29613.8	34866	34030.5	33876	37866.8	39411		26089.5	22508	19173.3	24545.2	22643.2	25851	25345.2	26359.4	35160	32375.2		21284.2	21586.7	23673.2	22625.7	19307.8	18928.3	25125.2	17567.4	28381.5	28311.5		11784.8	4155.33	12621.4	13964.2	12368.8	13184.7	11936.3	8982.5	15325.4	19662.5		5095	1886.17	5778.83	9434.33	8756.5
84.321	32843.8	32781.3	30730.5	35160.5	29645	34892.8	34062.8	33949.2	37940	39516.5		26122	22562	19238.3	24578	22704.8	25894.5	25409	26398.6	35225	32424		21338	21624.8	23722	22663.3	19348	18963.3	25152.2	17584.6	28425	28356		11800.8	4152	12631.2	13980.7	12393.8	13216.3	11941.7	8995.83	15331.8	19687.5		5091.67	1885.5	5787.5	9451	8779.67
85.321	32860	32803.3	30738.8	35160.5	29671.2	34919.2	34095.5	34014.5	37988.8	39614.2		26162.5	22605.3	19301.5	24603.8	22755.2	25948.5	25464.5	26437.4	35274	32461.7		21385.6	21635.7	23767.3	22682.8	19377	19005.8	25179.3	17623	28446.3	28395.3		11811.8	4153.67	12643.2	13997.3	12423.7	13243	11947.2	9010.83	15344.6	19707.2		5091.67	1885	5780.5	9467.5	8799.67
86.321	32884.2	32835.7	30771	35176.5	29702.2	34948.2	34119.8	34095.5	38078.2	39719.8		26187.2	22638	19361.3	24616.6	22800.7	26013.7	25517.5	26483	35347	32499.7		21439.4	21657.2	23809	22704.2	19411.7	19046.5	25211.8	17633.6	28489.8	28434.3		11833.5	4157	12661.2	14015.7	12448.5	13273	11947.2	9022.5	15351.2	19732.2		5087.83	1884.5	5787.33	9482.5	8821.33
87.321	32917	32868.3	30787.2	35192.5	29720.2	34972.2	34135.8	34160.5	38143	39817.5		26227.5	22703	19426.2	24649.4	22856.5	26084	25591.8	26509	35412	32537.7		21484.6	21700.7	23859.3	22734.7	19449.8	19081.2	25255	17665.4	28522.3	28478.8		11849.7	4158.67	12679.2	14038.8	12475.2	13298	11947.2	9037.33	15370.6	19762.7		5086.17	1885	5787.33	9502.33	8846.17
88.321	32933.2	32879.3	30795.5	35192.5	29746.8	35004	34168.8	34233.5	38208.2	39931		26260.2	22735.3	19485.8	24681.8	22905.7	26138.2	25637	26541.4	35452.5	32570		21532.2	21722	23904.8	22755.8	19472	19120	25282.3	17689	28549.5	28510.8		11855.2	4158.67	12689.2	14052.2	12500.2	13324.5	11947.2	9049	15383.4	19782.2		5076.83	1883.33	5789	9519	8866.17
89.321	32957.5	32900.7	30828	35192.5	29775.5	35019.2	34192.8	34306.8	38281.2	40012.5		26292.8	22778.7	19552.2	24707.8	22951	26187.2	25684.5	26574	35509.8	32608		21586.2	21749.5	23942.7	22791.7	19506.5	19162	25314.7	17706.2	28582	28548.3		11871.3	4157	12703.2	14068.8	12525.2	13356.2	11947.3	9060.67	15383.4	19801.7		5087.83	1886.67	5789	9534	8884.33
90.321	32982	32922.3	30836	35209	29810	35049	34200.8	34380	38354.2	40110		26325.2	22822.3	19613.7	24720.6	23006.8	26246.7	25740.2	26613	35566.8	32640.5		21627.2	21776.7	23996.5	22811.2	19541	19184.3	25336.5	17721.2	28614.5	28587.5		11887.8	4160.33	12713.2	14088.8	12550	13382.5	11952.7	9072.33	15396.6	19826.7		5084.5	1887.17	5792.33	9554	8906
101.621	33185.2	33204	31006.8	35290.5	30086.5	35309	34453	35168	39110	41020.2		26764.5	23299	20295	25072	23535.8	26935	26339	26944.4	36038	32944		22168.4	22074.7	24521.5	23115.7	19870	19612	25688.7	17932	28939.8	28938.7		12050.5	4166.83	12900.8	14294.8	12830.8	13688.5	11979.5	9195.17	15520.4	20035.3		5080.67	1885	5798.67	9747	9132.17
111.621	33347.5	33399.3	31153.2	35355.5	30316	35505	34664.2	35786	39728	41605.8		27194.8	23667.3	20818.3	25377.8	23954.5	27514.7	26798.2	27139.6	36354.8	33139		22601.2	22280.5	24945	23390.2	20139.5	19948.5	25997.5	18068.4	29173	29165		12185.8	4175	13074.2	14475.7	13053.5	13929.3	12001.5	9286.67	15617.6	20180		5082.33	1887.67	5817.33	9914.5	9308.17
121.621	33502.2	33594.3	31283.2	35387.5	30540.8	35677.2	34835	36322.5	40248.2	42028		27625.8	23960	21248.8	25670.2	24299.7	28029.3	27175	27302.2	36574.5	33280		22953.6	22459	25313	23653.8	20366.7	20228.8	26268.3	18187.8	29378.8	29343.3		12299.5	4178.33	13251.6	14647.3	13254.7	14141.8	12034	9359.67	15721.8	20298		5086.17	1888.83	5822	10060.8	9456.17
131.621	33624	33778.3	31413	35420.5	30755	35857.8	34981.2	36769.5	40695	42336.8		28007.5	24209.3	21594.7	25962.6	24585	28452	27466.5	27413	36737.2	33393.7		23231.8	22610.7	25630.8	23901.2	20575.7	20467	26539.3	18270.8	29568.2	29482.5		12402.5	4183.33	13417	14803.2	13422.3	14324.7	12072	9419.5	15806.4	20385.3		5071.83	1887.17	5828.17	10190.3	9588.83
141.621	33770.2	33973.3	31559.5	35469	30977.2	36049	35111.5	37119	41061	42556.5		28373.5	24415.3	21857	26236	24816.5	28793.5	27700.2	27510.2	36867	33485.7		23456.4	22740.7	25871.7	24127.7	20755	20655.5	26766.8	18341.4	29720	29582		12505.3	4186.67	13562.8	14948	13578.8	14477.5	12104.5	9469.17	15904	20460.2		5079	1889.33	5842	10305.2	9703.67
151.621	33892.2	34125.3	31697.5	35485.5	31159.8	36277.8	35241.5	37387	41369.5	42710.8		28649.8	24588.7	22068.2	26469.8	25005.7	29059	27885.8	27588.2	36956.5	33550.7		23642.4	22838.5	26071.3	24335.8	20903	20814.7	26956.7	18401	29850.2	29660.2		12581.3	4190	13698.2	15080.7	13706.3	14604	12126.2	9509.17	15995.2	20510.2		5079	1890.33	5853.5	10400	9800.17
161.621	34022	34287.7	31893	35534	31337	36513.8	35355.2	37623	41589.2	42832.8		28910	24740.3	22234.2	26691	25149.8	29254	28024	27646.8	37029.2	33610.5		23775.6	22919.7	26221.8	24519.3	21027	20934.7	27130	18432.6	29969.2	29737		12651.7	4193.33	13812	15195.3	13816.3	14710.3	12169.7	9547.5	16079.6	20564		5073.5	1889.83	5860.17	10474.7	9884.83
171.621	34176.5	34450.7	32087.8	35550.5	31506.8	36789.8	35485.5	37802	41784.2	42914		29097	24837.7	22368.8	26866.6	25280	29400.3	28145.8	27711.8	37110.5	33653.8		23890.6	23001	26350.5	24681	21126.5	21037.2	27270.8	18488.2	30072.3	29794		12727.7	4196.67	13909.6	15298.7	13912.7	14798.2	12202	9580.83	16151.2	20619.3		5079	1892	5870.17	10544.5	9956.33
181.621	34306.5	34580.7	32307.2	35599	31649.5	37073.5	35591	37939.8	41938.5	42987.2		29251.2	24946.3	22481.8	27022.4	25378.7	29514.2	28233	27751	37135.2	33681		23990.8	23049.8	26450.8	24820	21228.2	21118.2	27384.5	18511.8	30158.8	29831.7		12765.5	4198.33	13991.4	15383.3	13989.2	14869.8	12239.8	9604	16209.6	20633.7		5073.5	1890.33	5873	10594.2	10019.3
191.621	34436.8	34710.3	32543	35648	31795.5	37363	35672.2	38037.5	42060.5	43019.8		29373.2	25022.3	22568.3	27165.6	25463.5	29600.7	28307.2	27776.8	37183.8	33697.3		24061.8	23098.5	26530.2	24942.7	21303.8	21172.5	27482.2	18524.2	30234.7	29859.8		12819.8	4201.67	14069	15461.2	14058.8	14929.7	12277.8	9627.33	16268	20667.8		5071.83	1890.83	5885.17	10649.2	10074.2
201.621	34591.2	34840.3	32786.8	35696.5	31909.8	37667.8	35778	38135	42174.2	43068.5		29462.5	25098.3	22648	27295.8	25534.3	29665.8	28371	27815.8	37224.5	33724.3		24130.8	23142	26599.7	25046	21368.7	21236.3	27563.3	18560.6	30316.2	29891.8		12868.5	4206.67	14129	15526.2	14113.5	14982.8	12305	9645.5	16333.2	20694.5		5080.67	1890.83	5889.67	10687.5	10120.7
211.621	34737.8	34959.7	33030.8	35745.5	32011	37932.5	35875.2	38208	42223	43101		29527.5	25152.3	22711.2	27393.4	25596.7	29720	28408.2	27842	37249	33740.5		24185.2	23174.5	26656.7	25138.8	21425.3	21278.5	27628.5	18571.2	30375.7	29918.7		12890	4208.33	14183	15580.8	14165	15024.3	12326.7	9663.83	16378.6	20712.5		5079	1890.83	5893	10720.7	10159
221.621	34859.5	35046.3	33290.8	35826.5	32107.2	38191.8	35948.5	38265.2	42288.2	43117.2		29584.5	25206.3	22767.5	27484.2	25644.8	29752.5	28450.5	27848.4	37257	33740.5		24229.4	23190.5	26692.8	25226	21476.8	21315.7	27682.5	18592.6	30424.3	29932.7		12922.7	4211.67	14226.8	15632.5	14205	15059.2	12364.5	9678.83	16430.6	20725		5073.5	1891.33	5899.67	10748.8	10192.2
231.621	34997.5	35143.7	33510.5	35891.5	32193.2	38427.2	36013.5	38305.5	42353.2	43117.2		29633.2	25239	22815.8	27562.4	25688.2	29790.5	28485	27861.2	37281.2	33751.3		24273.2	23223.5	26740	25284.8	21524.7	21347.3	27736.8	18603.2	30467.7	29961.5		12955	4216.67	14268.6	15674.2	14243.3	15087.3	12391.8	9690.5	16469.6	20737.5		5077.33	1891.33	5899.67	10775.3	10225.3
241.621	35119.5	35230.7	33729.8	35973	32258	38639.2	36094.8	38330	42385.8	43141.8		29682	25271.3	22855.7	27627.2	25720.5	29801.2	28514.2	27874.6	37265	33751.3		24300	23239.5	26767.5	25349	21558.8	21366.5	27774.7	18605.2	30500.2	29970.2		12982.2	4215	14304.4	15712.3	14275	15115.7	12418.7	9698.83	16495.6	20748.2		5079	1891.33	5906.33	10795.3	10250.3
251.621	35217	35306.3	33924.8	36054	32320.5	38821.5	36159.8	38370.8	42410	43149.8		29690.2	25315	22888.8	27679.4	25737.7	29812	28527.5	27887.4	37289.5	33751.2		24325	23244.8	26791.7	25411.5	21600	21387.7	27801.8	18618.4	30538.2	29973.5		13004	4215	14334.4	15742.3	14301.5	15137.2	12446	9710.33	16534.8	20760.7		5066.5	1889.67	5909.67	10808.7	10273.5
261.621	35314.5	35382.3	34103.5	36119.5	32375	38979.8	36233.2	38379	42434.5	43149.8		29706.5	25315	22923.8	27718.4	25770.7	29828.2	28553.5	27893.8	37289.5	33751.3		24346	23272.3	26814.2	25445.2	21639.3	21409	27829	18620.2	30559.8	29991.7		13025.7	4220	14364.4	15768.7	14326.5	15153.8	12467.5	9715.33	16567	20771.7		5077.33	1893.67	5911.33	10827	10288.5
271.621	35396	35425.7	34249.8	36216.5	32419.2	39101.2	36273.5	38395	42459	43141.8		29706.5	25336.3	22947.2	27757.2	25789.8	29844.7	28566.5	27893.8	37289.5	33762.3		24367	23283	26831.2	25493.5	21662.8	21421	27866.8	18622.2	30592.3	29998.7		13036.3	4220	14384.2	15793.5	14346.5	15167.2	12483.8	9721.67	16593.2	20773.2		5072	1891.83	5916.33	10837	10308.5
281.621	35485.2	35479.7	34379.8	36314	32455.5	39214.8	36330.5	38411.2	42467.2	43158.2		29714.8	25358	22968.7	27783.2	25805.3	29844.7	28590.2	27893.8	37305.5	33756.8		24383.4	23277.7	26843.2	25520.2	21692.2	21442.2	27872.3	18628.6	30614	30000.3		13052.5	4220	14406	15816.7	14363.2	15185.5	12505.5	9728.33	16619.2	20773.2		5064.83	1892.33	5921.33	10843.7	10320.2
291.621	35550.2	35534.3	34493.8	36395.5	32497.2	39301.5	36371.2	38419.5	42491.2	43158		29723	25369	22990.3	27803	25820.8	29850	28592.8	27900.4	37314	33762.3		24400.2	23304.3	26864	25557.8	21707.2	21449.2	27888.5	18630.8	30624.8	30005.7		13063.5	4223.33	14422	15831.7	14381.3	15193.8	12532.5	9733.33	16645	20785.7		5064.83	1892.5	5914.33	10855.3	10335.2
301.621	35615.2	35566.3	34575	36476.5	32525.2	39391.8	36403.8	38427.5	42499.5	43150		29731	25390.3	23006.8	27835.4	25832.8	29855.5	28603.5	27900.4	37306	33762.2		24406.4	23299	26867.3	25581	21729.3	21456.2	27910.3	18630.6	30641.2	30002		13068.8	4223.33	14440	15845	14391.2	15205.5	12543.5	9738.33	16671.2	20780.3		5064.83	1891.83	5916	10860.3	10341.8
311.621	35664.2	35599.3	34640.2	36590.5	32543.5	39446.8	36452.5	38443.8	42515.5	43141.8		29714.8	25401.3	23025.2	27835.4	25827	29839.2	28603.5	27907	37297.8	33773.2		24412.4	23304.3	26875.5	25600.3	21744.3	21452.5	27921.2	18637.2	30651.8	30016.2		13074.2	4225	14454	15855	14406	15213.8	12559.7	9741.67	16690.8	20794.8		5064.83	1892.5	5922.83	10865.3	10346.8
321.621	35713	35642.3	34705	36672	32582.8	39496.5	36485	38443.8	42523.8	43141.8		29739	25401.3	23038.5	27855	25844.2	29839.2	28614.2	27900.4	37297.8	33773.2		24424.8	23299	26887.8	25620.2	21761.3	21476	27942.7	18643.6	30673.5	30007		13085.2	4223.33	14462	15870	14414.3	15218.8	12570.5	9745	16710	20794.8		5070.33	1891.83	5922.5	10871.8	10355
331.621	35753.5	35664.3	34745.8	36769.5	32592.8	39546.2	36517.5	38443.8	42524	43141.8		29706.5	25412.3	23048.5	27880.8	25849.2	29828.3	28606	27913.6	37297.8	33762.2		24441.8	23299	26892.7	25638	21778.3	21472.3	27942.8	18637	30679.2	30012.3		13090.7	4225	14476	15878.3	14419.3	15225.5	12581.3	9746.67	16723	20789.5		5064.83	1893	5929.5	10875.2	10360
341.621	35794	35696.7	34786.2	36867	32610.8	39577.8	36550	38419.5	42532.2	43109.2		29698.5	25412.3	23061.8	27880.8	25845.5	29796	28606	27907	37289.5	33772.8		24430.8	23304.3	26896	25650.3	21789.8	21476	27948	18637	30679.2	30012.2		13090.5	4228.33	14486	15883.3	14427.7	15227.2	12597.7	9746.67	16736	20789.5		5068.67	1892.5	5922.5	10873.5	10366.7
351.621	35826.8	35729	34827	36948.5	32623.8	39612.2	36566.5	38435.8	42524	43117.2		29706.5	25412.3	23075	27900.6	25841.8	29796	28606	27900.6	37281.5	33778.3		24446	23309.8	26904.8	25668.3	21807	21477.5	27953.5	18637	30684.5	30014		13106.8	4226.67	14496	15890	14431	15232.2	12608.5	9750	16762	20789.5		5063.17	1891.83	5925.83	10875.2	10363.3
361.621	35843	35750.7	34851.5	37013.5	32631.2	39630.2	36598.5	38435.8	42540.2	43109.2		29690.2	25412.3	23080	27894.2	25845.2	29785.2	28606	27900.6	37281.5	33773		24438.8	23309.8	26899.3	25670	21818.7	21476	27953.5	18639	30684.5	30019.3		13106.8	4228.33	14504	15896.7	14436	15232.2	12624.5	9750	16768.6	20794.8		5063.17	1890.33	5925.83	10873.5	10370
371.621	35875.2	35739.7	34859.8	37110.5	32636.2	39664.5	36615	38419.5	42548.2	43093		29682.2	25390.7	23086.7	27894.2	25846.8	29768.8	28606	27894	37265	33773		24438.8	23288.3	26901	25681	21827	21472.2	27958.8	18639	30689.7	30015.5		13090.7	4228.33	14510	15901.7	14444.3	15230.5	12630	9751.67	16781.8	20787.8		5061.5	1890.83	5925.83	10875.2	10366.7
381.621	35883.5	35761.7	34875.8	37192	32649.5	39680.2	36647.5	38419.5	42548.2	43084.8		29657.8	25401.3	23093.3	27887.6	25839.7	29747	28597.8	27894	37265	33778.5		24440.8	23293.8	26902.7	25677.2	21839.2	21479.7	27969.8	18632.6	30706	30026.5		13112.2	4231.67	14518	15903.3	14442.7	15233.8	12651.8	9753.33	16794.8	20794.8		5063.17	1892	5927.5	10875.2	10370
391.621	35907.8	35794	34891.8	37273.5	32657	39690.8	36647.5	38419.5	42540	43068.2		29657.8	25401.3	23098.3	27894.2	25832.7	29741.7	28589.5	27894	37248.8	33789.3		24440.8	23293.8	26900.7	25698.8	21849.2	21467.2	27964.3	18637	30689.7	30015.5		13096	4226.67	14520	15906.7	14447.7	15235.5	12651.8	9751.67	16781.8	20798.5		5064.83	1891.33	5930.83	10873.5	10368.3
401.621	35916	35794	34891.8	37338.5	32651.2	39703.8	36680	38419.5	42548.2	43060.2		29633.5	25390.7	23101.7	27874.6	25828.8	29714.5	28587	27900.4	37232.5	33783.8		24440.8	23283	26911.5	25693.3	21848.7	21469.2	27964.3	18630.6	30706.2	30015.7		13106.8	4230	14526	15906.7	14449.3	15230.5	12651.8	9753.33	16801.2	20787.8		5063.17	1891.33	5930.83	10871.8	10363.3
411.621	35940.5	35815.7	34900	37420	32656.2	39714.2	36688	38419.5	42548.2	43052		29641.8	25390.7	23113.3	27893.8	25821.8	29687.3	28571	27887.4	37216.2	33789.5		24442.8	23288.5	26906.2	25698.8	21872.7	21466	27975.2	18630.6	30695.3	30011.8		13101.5	4230	14529.8	15906.7	14454.3	15232.2	12662.5	9755	16820.4	20794.8		5061.5	1891.83	5929.17	10868.5	10356.7
421.621	35948.8	35815.7	34900	37468.5	32653.8	39716.8	36712.5	38411.2	42540	43043.8		29617	25379.7	23111.7	27881	25816.8	29676.7	28571	27874.6	37216.2	33794.8		24440.8	23277.7	26899.2	25698.8	21866.8	21452	27969.7	18635	30690	30015.5		13096	4230	14529.8	15910	14452.7	15227.2	12673.5	9751.67	16820.4	20787.7		5063.17	1891.33	5932.5	10863.5	10355
431.621	35956.8	35826.3	34891.8	37550	32656.2	39730	36712.5	38403	42531.8	43035.8		29608.8	25379.7	23118.2	27881	25799.2	29649.7	28568.5	27868	37192.2	33784		24427.8	23283	26902.8	25704.3	21873.5	21436.2	27975.2	18624.2	30684.5	30020.8		13101.5	4230	14531.6	15913.3	14447.7	15223.8	12684.3	9753.33	16833.6	20787.7		5054.5	1891.33	5930.83	10858.5	10353.3
441.621	35956.8	35848.3	34900	37615	32667	39732.5	36737	38394.8	42523.8	43019.8		29600.8	25379.7	23124.7	27881	25794.2	29638.8	28558	27868	37184	33794.8		24427.8	23261.2	26911.5	25708	21880.2	21432.8	27975.2	18622.2	30684.5	30008.5		13106.8	4231.67	14533.6	15911.7	14456	15222.2	12684.3	9750	16833.8	20793.2		5061.5	1893.5	5930.83	10855.3	10346.7
451.621	35964.8	35837.3	34900	37696	32664.5	39735	36737	38378.8	42515.8	43011.8		29584.8	25368.7	23131.3	27881	25783.8	29606.2	28541.5	27855	37167.5	33800.3		24419.2	23266.7	26895.3	25697.2	21893.8	21429.3	27975.2	18620.2	30679.2	30013.8		13095.8	4231.67	14537.6	15913.3	14449.3	15218.8	12684.3	9751.67	16846.6	20780.8		5054.5	1892.33	5929.17	10848.7	10343.3
461.621	35964.8	35837.3	34900.2	37728.5	32653.8	39745.8	36753	38370.8	42523.8	42995.2		29576.5	25358	23128	27881	25770.2	29579.2	28528.2	27854.8	37159.2	33805.7		24408.4	23250.3	26895.3	25697.3	21893.3	21408	27964.3	18620.2	30673.7	30001.5		13101.2	4235	14537.6	15911.7	14451	15212.2	12700.7	9755	16846.4	20786.2		5049	1892.5	5929.17	10847	10338.3
471.621	35956.5	35848.3	34908.2	37793.5	32653.8	39743.2	36769.2	38370.8	42515.8	42995.2		29544	25358	23131.3	27861.4	25764.7	29562.8	28523.2	27848.4	37135	33805.7		24404.4	23255.8	26893.7	25702.5	21896.5	21411.8	27969.7	18613.8	30679	29996		13090.5	4235	14539.6	15911.7	14454.3	15207.2	12695.2	9753.33	16853	20786.3		5059.83	1893.5	5925.33	10845.3	10333.3
481.621	35956.5	35848.3	34900.2	37842	32646.2	39743.2	36761.2	38370.8	42507.8	42971		29535.8	25347.3	23129.7	27868	25766.7	29530.5	28510.2	27835.4	37119	33811		24406.4	23239.7	26882.8	25690.2	21906.8	21388.8	27969.7	18607.4	30673.7	29996.2		13085.2	4235	14537.6	15910	14454.3	15203.8	12706.2	9750	16853	20779.2		5049	1893.5	5923.67	10838.7	10326.7
491.621	35948.5	35837.3	34900.2	37891	32640.8	39740.8	36777.5	38362.5	42507.5	42971		29527.8	25336.7	23131.3	27855	25752.7	29497.7	28481.2	27829	37110.8	33811		24398	23234	26879.5	25699.3	21908.2	21385.5	27964.5	18600.8	30662.8	29998.2		13079.8	4235	14537.6	15911.7	14449.3	15198.8	12700.7	9748.33	16859.6	20779.2		5049	1893	5923.67	10835.3	10321.7
501.621	35948.8	35870	34892	37940	32633.2	39746.5	36785.5	38346.2	42491.2	42962.8		29511.8	25336.7	23133	27842	25747.7	29476.3	28468	27822.4	37086.2	33832.5		24384.8	23228.7	26881.2	25693.8	21918.5	21376.7	27964.3	18600.8	30657.3	29992.7		13079.8	4236.67	14537.6	15913.3	14452.5	15192.2	12716.8	9746.67	16859.6	20780.8		5050.67	1892.5	5932.5	10830.3	10318.3
511.621	35940.5	35859	34892	37988.5	32633.2	39738.2	36793.8	38330	42491.2	42946.2		29503.5	25336.7	23131.3	27842	25731.8	29454.7	28459.8	27816	37054	33838		24382.8	23223.2	26879.5	25694	21916.5	21355.7	27959	18605.4	30662.8	29974.8		13080	4235	14533.6	15908.3	14452.5	15180.5	12711.5	9745	16872.8	20768.3		5056.5	1893.5	5930.83	10827	10310
521.621	35948.8	35859	34900.2	38021	32620.2	39735.8	36785.5	38322	42491.2	42930.2		29478.8	25314.7	23129.8	27835.4	25730.2	29416.5	28441.2	27802.8	37021.5	33821.8		24371.8	23212.3	26879.5	25692.2	21919.8	21343.5	27959	18598.8	30635.7	29974.8		13079.8	4233.33	14533.8	15910	14449.2	15175.5	12716.8	9743.33	16872.6	20763		5049	1893.5	5927	10822	10305
531.621	35932.5	35859	34875.5	38070	32609.5	39741.2	36802	38305.8	42491.2	42930.2		29462.8	25314.7	23129.8	27835.4	25723.5	29389.7	28430.8	27802.8	37005.2	33832.7		24369.8	23212.5	26869	25685.2	21926.5	21333.2	27959	18592.2	30641	29973.2		13079.8	4233.33	14535.6	15910	14454.2	15168.8	12722.2	9743.33	16872.6	20768.5		5052.67	1893	5925.33	10818.7	10301.7
541.621	35916	35859	34883.8	38102	32607	39741.2	36802	38297.5	42491.2	42906		29446.2	25303.7	23128.2	27829	25704.3	29351.5	28420	27796.4	36980.5	33827.2		24361.4	23196.2	26870.7	25683.5	21931.5	21317.3	27948.3	18590.2	30635.5	29966		13069	4235	14533.6	15910	14450.8	15162.2	12722.2	9740	16879.2	20766.8		5052.83	1893.5	5927	10810.5	10291.8
551.621	35916	35859	34883.8	38135	32591.2	39722.5	36810	38297.5	42467	42897.8		29438.2	25293	23131.5	27816	25690.3	29324.7	28390.5	27776.8	36964.5	33827.2		24354.8	23190.8	26867.3	25681.8	21934.8	21297.7	27948.3	18577	30624.8	29971.5		13063.5	4235	14532	15910	14451	15153.8	12722.2	9736.67	16879.2	20761.3		5052.83	1892.5	5927	10810.5	10286.8
561.621	35916.2	35859	34875.5	38183.5	32588.8	39736.2	36794	38289.5	42475.2	42889.8		29414	25293	23126.5	27822.6	25685.2	29292	28388	27770.2	36940	33827.3		24342.4	23190.7	26867.3	25681.7	21941.5	21287.2	27948.3	18581.6	30624.8	29964.3		13063.5	4231.67	14531.8	15915	14456	15150.7	12727.5	9735	16879.2	20759.7		5049.5	1894.5	5927	10808.8	10277
571.621	35900	35848	34875.5	38216.5	32575.8	39733.8	36794	38265	42467	42873.2		29405.8	25271.7	23123.2	27809.4	25669.3	29259.7	28361.2	27770.2	36916	33832.7		24335.8	23185.3	26862	25680.2	21943.2	21280.7	27948.3	18575	30619.5	29960.8		13052.7	4235	14527.8	15913.3	14454.3	15137.3	12716.8	9733.5	16885.6	20754.2		5051	1894.5	5925.33	10798.8	10273.7
581.621	35900	35848	34875.5	38248.5	32562.8	39709.5	36802	38257	42458.8	42849		29389.5	25260.7	23121.5	27809.4	25659	29221.5	28339.8	27750.8	36899.5	33827.2		24333.8	23169.2	26849.5	25662.3	21946.5	21252.3	27931.8	18568.6	30614	29959.2		13036.3	4231.67	14528	15908.3	14452.7	15132.3	12727.7	9731.83	16879.2	20748.7		5038.67	1895	5925.33	10795.5	10265.3
591.621	35900	35848.3	34867.5	38265	32565.8	39715	36818.2	38248.5	42458.8	42841		29381.5	25260.7	23116.5	27796.4	25646.8	29189.2	28329.2	27750.8	36875.2	33827.3		24325.4	23158.2	26851.7	25666.2	21951.7	21235	27937.3	18562.2	30608.5	29946.8		13036.5	4235	14528	15910	14456	15122.3	12727.7	9730.17	16885.8	20747		5044	1895.5	5925.5	10792.2	10258.7
601.621	35875.2	35848	34859.5	38281.5	32544.5	39712.8	36810.2	38240.5	42442.5	42824.8		29348.8	25239	23118.2	27783.6	25638.2	29151	28305.5	27744.6	36867	33816.5		24321.4	23152.8	26850.2	25664.5	21953.3	21224.7	27926.3	18560.2	30597.8	29941.3		13042	4240	14526	15906.7	14452.7	15114	12727.7	9725.17	16879.2	20741.7		5044	1895	5923.83	10785.5	10245.3
611.621	35875.2	35837.3	34867.5	38313.5	32545.2	39710.2	36818.2	38224.2	42450.5	42816.5		29340.5	25228	23116.5	27777	25629.3	29129.3	28292.5	27731.4	36842.5	33816.7		24306.4	23158.3	26843	25653.7	21958.3	21203.2	27920.8	18553.6	30592.3	29932.7		13036.5	4235	14528	15906.7	14452.7	15105.7	12727.5	9723.5	16885.8	20741.5		5042.33	1895	5922.17	10780.5	10232.2
621.621	35867.2	35837.3	34875.5	38346.5	32528.8	39705.2	36818.2	38208.2	42442.5	42800.2		29324.5	25228	23114.8	27763.8	25611.8	29097	28263	27718.4	36818.2	33805.7		24297.8	23147.3	26837.5	25652	21963.3	21178.7	27920.8	18553.8	30592.3	29925.5		13025.5	4236.67	14530	15908.3	14456	15097.3	12727.7	9720.33	16892	20734.7		5042.33	1895.5	5923.83	10777.2	10225.5
631.621	35867.2	35837.3	34851.5	38362.5	32529.5	39694.8	36818.5	38200	42418.5	42784		29308	25217.3	23106.5	27763.8	25599.5	29064.3	28250	27705.2	36794	33811		24282.8	23136.7	26830.5	25641	21961.3	21163	27915.5	18538.8	30581.3	29923.8		13020	4236.67	14526	15903.3	14454.3	15085.7	12743.8	9717	16885.6	20736.2		5042.33	1895	5923.83	10775.5	10213.8
641.621	35851	35837.3	34851.5	38395	32513	39692.2	36818.5	38192	42418.5	42776		29300	25206.3	23099.8	27750.8	25583.7	29031.8	28228.8	27698.6	36777.5	33800		24279	23120.3	26834.2	25637.7	21961	21154.7	27904.8	18532.2	30565.2	29927.5		13020	4235	14524	15905	14459.3	15079	12727.7	9713.67	16885.6	20727.5		5040.67	1895.5	5920.5	10768.8	10205.7
651.621	35842.8	35837.3	34859.5	38411	32521.2	39687.2	36826.5	38183.8	42418.5	42767.8		29292	25195.7	23094.8	27744.4	25585.7	28983.2	28226.2	27692.2	36769.5	33789.3		24270.6	23125.7	26825.5	25637.7	21964.5	21133.2	27904.8	18525.8	30565.2	29920.5		13009.3	4236.67	14524	15906.7	14462.7	15070.7	12738.5	9710.33	16885.6	20727.5		5040.67	1895	5922.17	10767.2	10202.3
661.621	35826.8	35826.7	34859.5	38411	32505	39676.5	36818.2	38175.5	42410.2	42759.5		29275.5	25206.3	23093.2	27744.4	25577	28945.2	28196.8	27673	36769.5	33789.5		24268.6	23109.7	26823.8	25636	21966.2	21114	27910.2	18517.4	30543.7	29909.8		13014.7	4238.33	14520	15906.7	14459.3	15057.3	12749.2	9707	16898.6	20727.5		5035.33	1893.33	5920.5	10760.5	10195.7
671.621	35818.8	35826.7	34851.5	38427.5	32494.5	39682.2	36818.2	38159.5	42393.8	42735.2		29259.2	25184.7	23083.3	27744.4	25562.8	28923.5	28186.2	27666.4	36761.2	33778.5		24262	23109.7	26816.7	25625.3	21969.5	21096.5	27888.7	18510.6	30543.3	29911.8		13009.3	4235	14518	15903.2	14464.3	15049	12733.2	9702.17	16898.6	20725.8		5040.67	1893.83	5918.83	10757.2	10189
681.621	35810.8	35826.7	34851.5	38444	32497	39669	36818.2	38151.2	42393.8	42727.2		29235	25163	23081.8	27731.4	25554.2	28885.7	28161.8	27659.8	36745	33783.8		24251.4	23087.7	26809.7	25636	21974.5	21073.8	27888.7	18502.2	30521.8	29895.5		12993.2	4236.67	14516	15906.5	14466	15039	12738.3	9700.5	16898.6	20720.5		5035.33	1894.33	5920.5	10752.2	10182.3
691.621	35810.8	35826.7	34851.5	38460	32483.8	39650.2	36826.5	38143.2	42385.5	42710.8		29235	25163.3	23071.7	27718.6	25554.2	28847.5	28143	27646.8	36745	33773		24258	23093.2	26809.7	25623.5	21981.5	21050.8	27872.3	18502.2	30511.2	29888.5		12998.5	4236.67	14518	15896.5	14466	15032.5	12738.5	9695.5	16898.4	20718.8		5028.5	1896	5917.17	10748.8	10174
701.621	35794.2	35815.7	34851.5	38476	32481.5	39647.8	36826.2	38135.2	42377.5	42702.5		29218.8	25152.3	23070	27718.6	25538.2	28815.2	28116	27627.4	36712.8	33767.7		24241	23082.2	26799.2	25612.7	21983.2	21031.7	27866.8	18500.2	30505.7	29886.8		12982.2	4236.67	14514	15898.2	14469.2	15015.8	12743.8	9690.5	16905	20713.5		5035.33	1895	5915.5	10743.8	10164
711.621	35786	35804.7	34851.5	38492.5	32479	39642.8	36834.5	38118.8	42361.5	42678.5		29202.5	25141.3	23063.5	27692.2	25538.7	28793.3	28119.2	27614.2	36696.2	33762.2		24237	23076.7	26803	25618.2	21990.2	21012.7	27861.5	18478.4	30494.8	29878.2		12987.5	4238.33	14514	15898.2	14469.2	15009.3	12743.8	9687.17	16892	20708		5033.67	1895.5	5918.83	10738.8	10159
721.621	35777.8	35804.7	34843.2	38492.5	32460.2	39629.5	36834.5	38110.5	42353.2	42678.5		29178	25130.3	23061.8	27692.2	25535	28761	28092.5	27601.2	36680	33751.2		24235	23071.5	26801.3	25611	21990.2	20989.8	27856	18478.6	30483.8	29872.7		12982.2	4236.67	14510	15893.3	14467.5	14999.3	12738.5	9680.5	16905	20708		5035.33	1896.17	5915.5	10732.3	10149
731.621	35761.5	35805	34835	38492.5	32447	39619	36826.5	38094.2	42345.2	42662.2		29170	25119.7	23060.2	27692.2	25526.3	28728.3	28071.5	27594.8	36647.8	33735.2		24224.6	23065.8	26801.5	25605.7	21993.5	20970.7	27850.5	18470	30478.5	29860.2		12982.2	4236.67	14510	15893.3	14465.8	14991.2	12733	9677.17	16898.6	20706.3		5035.33	1896.67	5913.83	10729	10139
741.621	35761.5	35804.7	34835	38525	32447	39616.5	36826.5	38086.2	42337	42646		29170	25109	23060.2	27679.4	25519.2	28711.8	28050	27581.8	36615	33729.8		24220.6	23060.5	26792.7	25604	21991.8	20946	27845.2	18457.2	30467.7	29858.5		12971.3	4240	14508	15896.7	14467.5	14976.3	12738.5	9677.17	16892	20700.8		5040.67	1896	5918.83	10725.7	10135.7
751.621	35761.5	35794.3	34826.8	38525	32442	39587.2	36826.5	38070.2	42320.8	42629.8		29137.2	25109	23058.5	27666.2	25519.2	28674	28036.8	27562.4	36599	33718.8		24212	23049.8	26785.5	25594.7	21993.5	20928.7	27829	18455.2	30456.8	29851.5		12966	4236.67	14506	15896.7	14467.5	14968	12738.5	9669	16892	20699.2		5033.83	1895	5913.83	10719	10122.3
761.621	35737	35783.3	34827	38525	32431.5	39579.8	36826.5	38062	42320.8	42621.5		29129.2	25087.3	23053.5	27659.6	25513.8	28652.5	28013	27562.4	36590.8	33713.3		24214.6	23039	26784	25598.5	21991.8	20900.2	27812.8	18433.6	30446	29855.2		12966	4238.33	14500	15890	14470.8	14954.7	12738.3	9667.33	16892.2	20699.2		5028.33	1896	5913.83	10715.7	10114
771.621	35737	35783.3	34835	38557.5	32426.8	39558.2	36826.5	38045.5	42320.8	42613.2		29113	25076.3	23048.5	27653.2	25508.2	28609	27986.2	27542.8	36582.5	33713.3		24197.6	23044.3	26777	25593	21989.8	20886.5	27807.3	18429	30451.5	29844.5		12960.5	4235	14504	15886.8	14469.2	14944.7	12743.8	9665.67	16898.6	20693.7		5033.83	1896.17	5915.5	10712.3	10104
781.621	35721	35772.7	34818.8	38557.5	32418.5	39574.5	36826.5	38037.5	42296.2	42589		29096.5	25065.3	23043.5	27646.6	25501	28587.5	27981.2	27516.8	36558.2	33686.3		24193.6	23028.2	26773.7	25586	21996.8	20859.8	27801.8	18427	30451.5	29826.5		12960.5	4238.33	14500	15888.5	14474.2	14934.7	12733	9659	16892.2	20681.3		5037.5	1895.5	5913.83	10704	10094
791.621	35712.8	35761.7	34827	38541.5	32408	39545.2	36826.2	38013.2	42296.2	42581		29080.5	25065.3	23040.2	27627.4	25501	28555	27954.2	27523.2	36550	33681		24189.6	23011.7	26761.3	25575.2	21995.3	20833.7	27796.3	18412.2	30429.7	29824.8		12955.2	4236.67	14498	15886.8	14470.8	14923	12744	9652.33	16898.6	20686.7		5035.83	1895.5	5905.17	10699	10087.3
801.621	35704.5	35761.7	34818.8	38541.5	32418.5	39542.8	36834.5	38005	42288	42572.8		29072.2	25065.3	23033.7	27627.4	25506	28533.2	27941.2	27510.2	36541.8	33675.5		24187.6	23017.2	26759.7	25580.7	22004	20817.8	27791	18410.2	30424.3	29812.3		12949.7	4238.33	14502	15881.8	14475.8	14909.7	12743.8	9650.67	16898.6	20681.2		5033.67	1896	5913.83	10699	10079
811.621	35696.5	35761.7	34818.8	38557.5	32408	39521.5	36834.5	37997	42279.8	42556.5		29064	25044	23022	27620.8	25502.5	28495.3	27917.2	27490.6	36509.2	33670		24175.2	23006.3	26765	25569.7	22002.3	20798.5	27769.3	18390.6	30413.7	29821.5		12938.8	4240	14500	15883.5	14475.8	14903	12749.3	9645.67	16898.6	20667		5025.17	1895.5	5910.5	10694	10065.8
821.621	35688.2	35750.7	34810.5	38541.5	32400	39516.8	36834.5	37980.5	42271.8	42532		29048	25033.3	23017	27601.4	25495.3	28462.8	27909.2	27477.6	36485	33653.8		24171	22995.7	26760	25562.7	21998.7	20772.3	27769.3	18388.6	30402.7	29805.2		12938.8	4236.67	14498	15878.5	14474.2	14888	12733	9640.67	16898.6	20663.3		5025.17	1895.5	5912.17	10690.7	10054.2
831.621	35688.2	35750.7	34810.5	38573.5	32396.5	39503.5	36842.8	37972.5	42263.8	42524		29039.8	25033.3	23012	27595	25500.3	28430.3	27888	27464.6	36477	33664.7		24162.6	22995.7	26753	25568.2	22004	20751	27764	18388.6	30408	29798.2		12933.3	4240	14496	15875.2	14470.8	14878.2	12744	9632.33	16898.6	20661.5		5025.17	1895	5910.5	10685.7	10047.5
841.621	35672	35740	34802.5	38557.5	32394	39490.5	36842.8	37964.5	42239.5	42515.8		29023.5	25011.3	23003.7	27581.8	25495	28403.2	27877.5	27445.2	36468.8	33648.3		24158.6	22979.3	26753	25555.7	22000.3	20726.5	27747.7	18367.2	30397.2	29789.3		12933.3	4235	14494	15873.5	14474.2	14861.5	12744	9630.67	16898.6	20654.5		5025.17	1895.5	5912.17	10684	10032.7
851.621	35672	35729	34802.2	38541.5	32391.5	39477.2	36842.8	37948	42247.5	42499.2		29007.5	25022.3	22997	27575.4	25503.7	28365.2	27845.5	27425.6	36468.8	33632.3		24152.6	22984.7	26753	25544.7	22005.7	20695	27742.3	18358.6	30381.2	29793.2		12933.3	4236.67	14490	15870.2	14470.8	14854.8	12744	9625.67	16885.8	20654.5		5026.83	1896	5905.17	10677.3	10021
861.621	35664	35729	34786.5	38557.5	32394	39472.2	36842.8	37931.5	42239.5	42491		29015.5	25000.3	22992	27562.4	25507	28332.8	27824.5	27419.2	36452.5	33632.2		24144	22974	26745.8	25541.5	22005.7	20686.8	27742.3	18350.2	30381	29776.8		12933.3	4240	14490	15865.2	14470.8	14836.5	12743.8	9617.33	16892.2	20649.2		5025.17	1894	5903.5	10674	10017.7
871.621	35672	35718	34778.2	38557.5	32396.5	39469.8	36842.8	37923.5	42215	42475		28999	25000.3	22983.7	27562.4	25501.7	28305.7	27816.2	27393.2	36428.2	33616		24153	22957.7	26745.8	25532.2	21993.2	20656.8	27731.5	18343.6	30370.2	29769.7		12922.3	4238.33	14486	15865.2	14469.2	14829.8	12738.3	9612.33	16898.6	20642.2		5021.83	1895.5	5901.83	10670.7	10004.3
881.621	35647.8	35718	34778.2	38557.5	32386	39443	36842.8	37907.5	42215	42459		28991	24989.7	22982	27529.8	25515.7	28273	27792.2	27367.2	36420	33610.5		24136	22957.7	26731.5	25526.8	21993.2	20633.8	27720.7	18328.8	30370.2	29768		12911.8	4238.33	14488	15858.5	14467.5	14814.8	12738.3	9605.67	16885.6	20636.8		5023.5	1895.17	5898.5	10662.5	9994.33
891.621	35639.5	35707.3	34778.2	38541	32396.5	39438	36858.8	37891.2	42206.8	42450.8		28983	24989.7	22973.7	27530	25512	28240.7	27781.8	27367	36403.8	33605.2		24136	22957.7	26731.5	25526.8	21996.8	20604	27715.2	18314	30364.8	29753.8		12917.2	4238.33	14486	15856.8	14469.2	14803.2	12738.3	9600.67	16892.2	20629.7		5021.83	1895.5	5900.17	10660.8	9984.33
901.621	35639.5	35696.7	34778.2	38541	32383.5	39424.8	36850.8	37883	42198.5	42434.2		28966.5	24968.3	22968.7	27510.4	25506.7	28208.2	27771.2	27341.2	36379.2	33588.7		24130	22952.2	26726.5	25521.3	21993.5	20581	27709.7	18305.4	30359.3	29753.8		12917.2	4240	14482	15846.8	14464.2	14791.7	12738.3	9595.67	16898.6	20629.7		5021.83	1895	5901.83	10652.5	9974.67
911.621	35631.2	35686	34770	38525	32391.5	39424.8	36850.8	37858.5	42190.5	42426.2		28950.5	24968.3	22962.2	27490.8	25506.3	28181.2	27752.5	27321.4	36363.2	33583.3		24124.2	22930.5	26733.7	25510.7	21999	20554.8	27699	18292.2	30343.2	29741.7		12906.3	4235	14478	15846.8	14464.2	14778.5	12733	9590.67	16885.6	20624.2		5021.83	1893.83	5901.83	10650.8	9966.33
921.621	35615	35686	34762	38541	32391.5	39419.8	36867	37866.5	42174.5	42418		28934	24957.3	22955.5	27477.8	25509.7	28153.8	27733.5	27321.4	36347	33561.8		24117.6	22930.5	26724.8	25510.7	21990.2	20528.5	27688.2	18290.2	30332.3	29734.5		12906.3	4238.33	14478	15841.8	14459.2	14766.8	12733	9585.67	16885.8	20617		5021.83	1893.33	5900.17	10642.5	9958
931.621	35607	35675	34762	38509	32383.5	39414.8	36858.8	37850.5	42166.5	42401.8		28926	24946.3	22945.5	27458.2	25508	28121.7	27720.8	27295.8	36330.5	33556.3		24116.2	22919.7	26721	25506.8	21993.5	20505.5	27682.8	18288.2	30326.8	29725.7		12901	4236.67	14478	15836.8	14455.8	14753.5	12733.2	9580.67	16879.2	20622.5		5021.83	1893.33	5894.67	10635.8	9948
941.621	35598.8	35664	34753.8	38525	32372.8	39388	36858.8	37834.5	42158.2	42385.5		28918	24935.3	22943.8	27445.4	25509.7	28089	27699.8	27276	36306.2	33529.2		24105.8	22908.7	26719.3	25489	21984.8	20472.3	27677.2	18253.8	30310.5	29720.2		12901	4233.33	14474	15833.5	14455.8	14741.8	12733	9572.33	16879.2	20604.3		5021.83	1895	5893	10629.2	9934.67
951.621	35599	35664	34745.8	38509	32370.2	39385.5	36867	37826.2	42158.2	42377.5		28901.8	24924.7	22933.8	27432.4	25514.7	28067.3	27678.2	27263	36298	33534.5		24101.8	22898	26717.7	25487.3	21979.8	20458.8	27666.3	18251.8	30316	29709.2		12895.5	4235	14474	15828.5	14454.2	14731.8	12727.7	9569	16885.8	20597.3		5018	1896.17	5893	10627.5	9926.33
961.621	35590.8	35653	34737.8	38492.5	32370.2	39380.5	36858.8	37809.8	42158.2	42361.5		28901.5	24924.7	22927.2	27406.4	25514.5	28034.8	27659.5	27250.2	36265.5	33518.3		24097.8	22898	26710.7	25481.8	21981.5	20421.5	27655.5	18232.2	30305.2	29709.2		12890	4235	14474	15826.8	14449.2	14716.8	12727.7	9559	16879.2	20597.3		5021.83	1895	5898.5	10619.2	9914.67
971.621	35582.8	35653	34721.2	38492.5	32365.2	39367.2	36858.8	37801.5	42125.5	42361.5		28885.5	24914	22917.3	27393.4	25510.7	28007.7	27644	27237.2	36233	33507.7		24092	22887	26702	25471	21972.7	20402.5	27650.2	18224	30288.8	29695.2		12890	4233.33	14468	15820.2	14444.2	14700.2	12727.7	9552.33	16879.2	20584.8		5021.83	1891.17	5896.83	10612.5	9908
981.621	35590.8	35653	34721.2	38476	32373.2	39359.2	36866.8	37785.2	42125.5	42345		28869	24914	22912.3	27373.6	25516.2	27980.5	27625.2	27224	36216.8	33496.7		24094.4	22876.2	26698.7	25471	21967.7	20374.3	27639.3	18215.4	30294.3	29700.5		12890	4235	14468	15816.8	14444.2	14690.2	12727.7	9550.67	16885.6	20586.5		5020.17	1894	5893	10612.5	9898
991.621	35566.2	35642.3	34729.2	38476	32368.2	39338	36866.8	37769	42117.5	42328.5		28853	24903	22900.7	27347.8	25514.2	27948	27612	27204.8	36200.5	33496.8		24084	22870.8	26698.7	25453.2	21967.7	20341	27634	18206.8	30278.2	29682.8		12884.5	4235	14464	15808.5	14437.7	14675.2	12722.3	9544.17	16872.8	20579.5		5020.17	1891.17	5891.33	10600.8	9893
1001.62	35558.2	35631.7	34713.2	38476	32360.5	39335.5	36867	37761	42101.5	42328.5		28836.8	24881.3	22895.8	27328.2	25517.8	27921	27596.5	27185.2	36176	33480.5		24080	22860.2	26686.2	25447.7	21966	20311	27628.5	18198.2	30272.8	29688.2		12879.2	4233.33	14464	15802	14434.3	14660.3	12727.7	9535.83	16872.8	20583.2		5020.17	1891.17	5891.33	10599.2	9886.33
[truncated: 5 more columns]

## Sheet: Dendrogram input data
label	BGI 0 DAT	BGI 1 DAT	BGI 2 DAT	BGI 3 DAT	BGI 4 DAT	BGI 5 DAT	BGI 6 DAT	BGI 7 DAT	BGI 8 DAT	BGI 9 DAT	BGI 10 DAT	BGI 11 DAT	BGI 12 DAT	BGI 13 DAT	BGI 14 DAT	BGI 15 DAT	BGI 16 DAT	BGI 17 DAT	BGI 18 DAT	BGI 19 DAT	BGI 20 DAT	BGI 21 DAT	BGI 22 DAT	BGI 23 DAT	BGI 24 DAT	BGI 25 DAT	BGI 26 DAT	BGI 27 DAT	BGI 28 DAT	BGI 29 DAT	BGI 30 DAT	BGI 31 DAT	BGI 32 DAT	BGI 33 DAT	BGI 34 DAT	BGI 35 DAT	BGI 36 DAT	BGI 37 DAT	BGI 38 DAT	GLI 0 DAT	GLI 1 DAT	GLI 2 DAT	GLI 3 DAT	GLI 4 DAT	GLI 5 DAT	GLI 6 DAT	GLI 7 DAT	GLI 8 DAT	GLI 9 DAT
Polygonatum odoratum				0.653146	0.688648	0.69169	0.695279	0.71647	0.677833	0.700071	0.691053	0.669303	0.688025	0.695369	0.701791	0.704538	0.706007	0.714375	0.705577	0.702063	0.630572	0.636492	0.624477	0.637235	0.674172	0.697943	0.64581	0.668053	0.678744	0.690823	0.69221	0.687421	0.648346	0.634151	0.668255	0.690633	0.693687	0.716309	0.723467				0.116874	0.106296	0.102416	0.095525	0.0883958	0.100378	0.0994038
Pachysandra terminalis				0.647708	0.664998	0.669351	0.675207	0.683276	0.653436	0.689921	0.717827	0.696746	0.711715	0.708077	0.718553	0.712478	0.718356	0.711975	0.71482	0.686442	0.692502	0.69644	0.685848	0.699795	0.731971	0.74271	0.679493	0.70497	0.720761	0.729578	0.736381	0.730043	0.709247	0.690856	0.690167	0.697103	0.699817	0.722146	0.75539				0.124264	0.122549	0.120185	0.112611	0.109715	0.120175	0.115244
Hosta plantaginea				0.644735	0.691595	0.697735	0.710559	0.72531	0.695581	0.726192	0.731195	0.719795	0.788092	0.782822	0.787107	0.789063	0.788793	0.786778	0.786261	0.784334	0.7102	0.717697	0.716988	0.716596	0.719995	0.732599	0.631987	0.670423	0.682676	0.708528	0.718962	0.732879	0.718503	0.719871	0.73523	0.7261	0.726953	0.748231	0.781711				0.175007	0.160335	0.155875	0.14233	0.136968	0.149673	0.146277
Carex maculata	0.660913	0.675896	0.670775	0.685221	0.672396	0.669418	0.685822	0.68753	0.694194	0.688313	0.701467	0.692233	0.69018	0.68298	0.688128	0.693591	0.692631	0.695711	0.691982	0.714289	0.623092	0.596925	0.611148	0.62213	0.630833	0.653062	0.664818	0.652064	0.661237	0.676155	0.669647	0.676458	0.685408	0.689897	0.687522	0.698778	0.692999	0.681681	0.681498	0.121284	0.122865	0.117611	0.115157	0.113636	0.117962	0.115133	0.11371	0.111522	0.109213
Aster spathulifolius	0.754958	0.766813	0.785899	0.759812	0.776037	0.786805	0.794821	0.790814	0.763921	0.772766	0.790237	0.781866	0.796608	0.79677	0.810401	0.815377	0.814871	0.807371	0.807654	0.793118	0.658584	0.685308	0.678029	0.686145	0.682046	0.682507	0.671597	0.672128	0.674808	0.668373	0.665764	0.665881	0.677666	0.672745	0.677802	0.686446	0.680287	0.667688	0.673242	0.0807526	0.0822139	0.085711	0.0817531	0.0828906	0.0782383	0.0783612	0.0726225	0.0778619	0.0789449
Phedimus takesimensis								0.685626	0.705368	0.698388	0.700729	0.702087	0.674337							0.707571	0.688717	0.69175	0.689592	0.67961	0.704652	0.727756	0.719186	0.717852	0.725097	0.732924	0.729218	0.720642	0.725811	0.717666	0.714654	0.718812	0.718952	0.718583	0.726717								0.099295	0.0892827	0.0936403
Iris sanguinea	0.720855	0.732101	0.718047	0.732549	0.722101	0.723296	0.718746	0.724417	0.73642	0.730944	0.744522	0.736526	0.759054	0.75417	0.746494	0.747669	0.747668	0.741576	0.740576	0.743425	0.681443	0.691306	0.710025	0.714709	0.724577	0.748416	0.763464	0.735823	0.737489	0.754267	0.768686	0.76588	0.765151	0.758673	0.758422	0.763487	0.780447	0.776511	0.778521	0.0864068	0.0797743	0.0822565	0.0782674	0.0783937	0.0801503	0.0800266	0.0799071	0.078439	0.0757404
Lilium lancifolium	0.667385	0.677071	0.657033	0.684184	0.665119	0.654408	0.660597	0.663573	0.670764	0.648463	0.663557	0.68643	0.693766	0.70786	0.706574	0.705719	0.695986	0.692148	0.695303	0.672811	0.742063	0.748769	0.756735	0.764075	0.767969	0.763663	0.774327	0.735121	0.736566	0.738648	0.747255	0.746037	0.757907	0.760386	0.766175	0.771372	0.774742	0.769744	0.769808	0.105525	0.10069	0.109098	0.098946	0.107762	0.115278	0.109444	0.108408	0.107012	0.115099
Allium dumebuchum	0.646481	0.665421	0.662183	0.677143	0.657901	0.671818	0.682199	0.670205	0.675615	0.690093	0.687488	0.688412	0.671895	0.662596	0.676758	0.676542	0.672828	0.667387	0.674627	0.704229	0.623476	0.612374	0.624265	0.632873	0.646207	0.671235	0.682756	0.662585	0.676547	0.690162	0.677806	0.696181	0.704749	0.71307	0.709957	0.72007	0.71609	0.705628	0.709604	0.0968495	0.0965809	0.0969737	0.095476	0.0940144	0.0874033	0.0941203	0.0972283	0.100553	0.0909896
Mukdenia rossii	0.608443	0.604556	0.580476	0.619347	0.557714	0.542931	0.570053	0.631283	0.64291	0.579097	0.620124	0.636147	0.628107	0.635726	0.590781	0.636783	0.62832	0.635574	0.623019	0.651602	0.472732	0.479142	0.525281	0.505336	0.51213	0.537065	0.553479	0.506087	0.517023	0.535071	0.54881	0.558639	0.57204	0.579887	0.584656	0.602656	0.607453	0.61196	0.632015	0.138292	0.135579	0.141943	0.13382	0.15283	0.158082	0.144359	0.127455	0.130773	0.148409
[truncated: 148 more columns]

## Sheet: SVM input data
Moisture	BGI	GLI	NGRDI	Cluster
32.5	0.710986	0.106781	0.0474149	Cluster.1
32.5	0.691357	0.112793	0.0467042	Cluster.1
32.5	0.68274	0.114516	0.045228	Cluster.1
32.5	0.687435	0.111414	0.0424782	Cluster.1
32.5	0.688647	0.116651	0.0524265	Cluster.1
32.5	0.687894	0.1103	0.0358268	Cluster.1
32.5	0.694529	0.104022	0.0285072	Cluster.1
32.5	0.689831	0.0989232	0.0197937	Cluster.1
32.5	0.69736	0.101096	0.0272394	Cluster.1
32.5	0.715572	0.146723	0.125943	Cluster.1
32.5	0.727397	0.134505	0.110667	Cluster.1
32.5	0.717937	0.13306	0.101456	Cluster.1
32.5	0.718273	0.13826	0.111899	Cluster.1
32.5	0.690495	0.108261	0.0380713	Cluster.1
32.5	0.692451	0.108654	0.0394491	Cluster.1
32.5	0.669903	0.113619	0.0359724	Cluster.1
32.5	0.667423	0.116586	0.0401194	Cluster.1
32.5	0.721295	0.0989467	0.0396623	Cluster.1
32.5	0.690541	0.111983	0.0273317	Cluster.1
32.5	0.684125	0.102956	0.0136949	Cluster.1
32.5	0.687664	0.116571	0.0326278	Cluster.1
32.5	0.688538	0.123689	0.038213	Cluster.1
32.5	0.698737	0.121022	0.0467166	Cluster.1
32.5	0.717288	0.145037	0.124025	Cluster.1
32.5	0.722855	0.132769	0.104382	Cluster.1
32.5	0.720755	0.152767	0.142509	Cluster.1
32.5	0.718911	0.159589	0.154337	Cluster.1
32.5	0.751153	0.141222	0.139577	Cluster.1
31	0.655733	0.122802	0.041693	Cluster.1
31	0.647562	0.116512	0.026289	Cluster.1
31	0.66032	0.127351	0.0529192	Cluster.1
31	0.660111	0.12454	0.0485614	Cluster.1
31	0.680841	0.115212	0.0437962	Cluster.1
30.6	0.688641	0.113063	0.0446785	Cluster.1
30.6	0.680457	0.116405	0.0459892	Cluster.1
30.6	0.707636	0.108516	0.0478181	Cluster.1
30.6	0.686911	0.111527	0.0413508	Cluster.1
30.6	0.707323	0.1081	0.0469078	Cluster.1
30.6	0.646968	0.132469	0.0330156	Cluster.1
30.6	0.679566	0.110238	0.0276342	Cluster.1
30.6	0.630198	0.133471	0.0231669	Cluster.1
30.6	0.642457	0.122168	0.0171803	Cluster.1
30.6	0.66799	0.102531	-0.00310529	Cluster.1
30.6	0.700925	0.15659	0.134639	Cluster.1
30.6	0.730659	0.130997	0.105361	Cluster.1
30.6	0.685318	0.16106	0.132805	Cluster.1
30.6	0.663814	0.159906	0.115441	Cluster.1
30.6	0.697187	0.139811	0.101144	Cluster.1
30.6	0.691188	0.112318	0.0455913	Cluster.1
30.6	0.698936	0.110129	0.0461037	Cluster.1
30.6	0.680856	0.116037	0.045543	Cluster.1
30.6	0.68214	0.120587	0.054077	Cluster.1
30.6	0.675991	0.116595	0.0441156	Cluster.1
30.6	0.662499	0.124244	0.0329109	Cluster.1
30.6	0.685436	0.0977373	0.00980964	Cluster.1
30.6	0.677714	0.11742	0.0231183	Cluster.1
30.6	0.671743	0.11577	0.0249425	Cluster.1
30.6	0.678641	0.107885	0.0155126	Cluster.1
30.6	0.708071	0.149708	0.126084	Cluster.1
30.6	0.697555	0.132084	0.0851354	Cluster.1
30.6	0.722692	0.146454	0.13006	Cluster.1
30.6	0.711935	0.144091	0.117827	Cluster.1
30.6	0.712541	0.139314	0.109304	Cluster.1
30.4	0.71473	0.113557	0.0616046	Cluster.1
30.4	0.697849	0.109418	0.0438491	Cluster.1
30.4	0.700507	0.109656	0.0461254	Cluster.1
30.4	0.696789	0.110342	0.0454057	Cluster.1
30.4	0.69746	0.105727	0.0373384	Cluster.1
30.4	0.723952	0.0901919	0.0256979	Cluster.1
30.4	0.719262	0.0941251	0.0258658	Cluster.1
30.4	0.710672	0.0977185	0.0221279	Cluster.1
30.4	0.714975	0.093107	0.0269955	Cluster.1
30.4	0.720274	0.0842287	0.0149888	Cluster.1
30.4	0.727844	0.137273	0.115952	Cluster.1
30.4	0.725189	0.143079	0.125648	Cluster.1
30.4	0.751046	0.124876	0.107366	Cluster.1
30.4	0.730192	0.132777	0.108771	Cluster.1
30.4	0.721706	0.131743	0.101377	Cluster.1
29.6	0.682833	0.116703	0.0474792	Cluster.1
29.6	0.676074	0.125301	0.0594286	Cluster.1
29.6	0.673984	0.125269	0.0582371	Cluster.1
29.6	0.668929	0.12457	0.0544863	Cluster.1
29.6	0.677658	0.122482	0.0556496	Cluster.1
29.4	0.670976	0.12963	0.0635265	Cluster.1
29.4	0.644055	0.121421	0.032897	Cluster.1
29.4	0.688404	0.113982	0.0464828	Cluster.1
29.4	0.670638	0.107147	0.0244888	Cluster.1
29.4	0.679801	0.115876	0.0450974	Cluster.1
29.3	0.670098	0.119222	0.0447373	Cluster.1
29.3	0.677783	0.114652	0.0411575	Cluster.1
29.3	0.644646	0.119932	0.0313617	Cluster.1
29.3	0.659003	0.127603	0.0540009	Cluster.1
29.3	0.695559	0.1084	0.0408319	Cluster.1
29.3	0.667227	0.121965	0.0341128	Cluster.1
29.3	0.676238	0.125277	0.0456716	Cluster.1
29.3	0.669407	0.110613	0.0182035	Cluster.1
29.3	0.66847	0.115365	0.0196228	Cluster.1
29.3	0.665413	0.127704	0.0420165	Cluster.1
29.3	0.70991	0.149939	0.127578	Cluster.1
29.3	0.696297	0.162983	0.143705	Cluster.1
29.3	0.692608	0.147249	0.11133	Cluster.1
29.3	0.697532	0.154566	0.128813	Cluster.1
29.3	0.692327	0.164636	0.144918	Cluster.1
29.1	0.685522	0.122164	0.0588303	Cluster.1
29.1	0.690738	0.115411	0.0500334	Cluster.1
29.1	0.688576	0.107204	0.0343371	Cluster.1
29.1	0.688394	0.115559	0.0488012	Cluster.1
29.1	0.684421	0.108211	0.0340023	Cluster.1
29.1	0.68304	0.10912	0.0260382	Cluster.1
29.1	0.683703	0.112126	0.019627	Cluster.1
29.1	0.682321	0.111967	0.0203489	Cluster.1
29.1	0.682573	0.107279	0.0156196	Cluster.1
29.1	0.684745	0.108082	0.0183873	Cluster.1
29.1	0.721552	0.139878	0.117005	Cluster.1
29.1	0.726503	0.140528	0.121147	Cluster.1
29.1	0.723405	0.141332	0.1209	Cluster.1
29.1	0.725555	0.130682	0.101322	Cluster.1
29.1	0.729536	0.132418	0.107633	Cluster.1
29.1	0.693361	0.11015	0.0423488	Cluster.1
29.1	0.694582	0.109825	0.0427287	Cluster.1
29.1	0.723457	0.0959299	0.034068	Cluster.1
29.1	0.676661	0.119206	0.0482311	Cluster.1
29.1	0.679893	0.111432	0.0364222	Cluster.1
29.1	0.713696	0.115038	0.058133	Cluster.1
29.1	0.710343	0.120993	0.0517511	Cluster.1
29.1	0.712945	0.12003	0.0538452	Cluster.1
29.1	0.709925	0.126391	0.0675503	Cluster.1
29.1	0.71548	0.114231	0.0515296	Cluster.1
29.1	0.776438	0.0876084	0.051595	Cluster.1
29.1	0.787332	0.0859797	0.0550583	Cluster.1
29.1	0.793366	0.0830359	0.0529961	Cluster.1
29.1	0.791821	0.0906721	0.0661603	Cluster.1
29.1	0.796359	0.0747489	0.0384985	Cluster.1
29.1	0.687986	0.104726	0.0293489	Cluster.1
29.1	0.665268	0.118156	0.0398115	Cluster.1
29.1	0.682465	0.114997	0.0442931	Cluster.1
29.1	0.684842	0.102304	0.0238097	Cluster.1
29.1	0.694338	0.101317	0.027734	Cluster.1
29.1	0.702343	0.124754	0.0648677	Cluster.1
29.1	0.716018	0.118079	0.0558234	Cluster.1
29.1	0.703746	0.129226	0.0636925	Cluster.1
29.1	0.703108	0.12087	0.056262	Cluster.1
29.1	0.715168	0.127205	0.0760715	Cluster.1
29.1	0.75659	0.101222	0.0656076	Cluster.1
29.1	0.782377	0.0909158	0.061124	Cluster.1
29.1	0.789585	0.0910949	0.0657016	Cluster.1
29.1	0.784395	0.0889083	0.0578412	Cluster.1
29.1	0.801164	0.0923117	0.0747263	Cluster.1
28.8	0.678499	0.122698	0.0568469	Cluster.1
28.8	0.683314	0.116772	0.0487541	Cluster.1
28.8	0.686899	0.118052	0.0532795	Cluster.1
28.8	0.686635	0.10596	0.0316707	Cluster.1
28.8	0.690757	0.112301	0.0453184	Cluster.1
28.8	0.646443	0.112188	0.0171541	Cluster.1
28.8	0.648973	0.136341	0.049422	Cluster.1
28.8	0.630105	0.165192	0.100334	Cluster.1
28.8	0.659365	0.184823	0.159077	Cluster.1
28.7	0.680397	0.108069	0.03097	Cluster.1
28.7	0.686149	0.12024	0.0556269	Cluster.1
28.7	0.686634	0.103057	0.0259111	Cluster.1
28.7	0.702442	0.10036	0.0304813	Cluster.1
28.7	0.707531	0.100077	0.033155	Cluster.1
28.7	0.70708	0.116659	0.0546874	Cluster.1
28.7	0.719362	0.113728	0.0508153	Cluster.1
28.7	0.719431	0.120897	0.0663325	Cluster.1
28.7	0.723125	0.11439	0.0560856	Cluster.1
28.7	0.722781	0.111656	0.0534706	Cluster.1
28.7	0.776734	0.0861891	0.0491517	Cluster.1
28.7	0.787103	0.0823561	0.0481969	Cluster.1
28.7	0.790044	0.0882196	0.0606004	Cluster.1
28.7	0.794497	0.0825233	0.0522982	Cluster.1
28.7	0.795588	0.0825232	0.0532103	Cluster.1
28.3	0.681434	0.110438	0.0354979	Cluster.1
28.3	0.670763	0.110184	0.028846	Cluster.1
28.3	0.663007	0.118882	0.0394736	Cluster.1
28.3	0.665962	0.116441	0.0367244	Cluster.1
28.3	0.680814	0.112235	0.0387957	Cluster.1
28.3	0.658903	0.129739	0.0459583	Cluster.1
28.3	0.665309	0.119005	0.0321737	Cluster.1
28.3	0.666993	0.122861	0.0367138	Cluster.1
28.3	0.662268	0.122921	0.0363446	Cluster.1
28.3	0.671517	0.118219	0.0326001	Cluster.1
28.3	0.68873	0.163726	0.139893	Cluster.1
28.3	0.687515	0.157088	0.125747	Cluster.1
28.3	0.680784	0.168106	0.142975	Cluster.1
28.3	0.683705	0.165444	0.139792	Cluster.1
28.3	0.71724	0.14731	0.127644	Cluster.1
27	0.69886	0.107407	0.0410479	Cluster.1
27	0.701028	0.108837	0.0445975	Cluster.1
27	0.685623	0.118116	0.0518103	Cluster.1
27	0.695045	0.111447	0.0453744	Cluster.1
27	0.670344	0.117651	0.0418316	Cluster.1
27	0.706317	0.121374	0.0585056	Cluster.1
27	0.713999	0.114442	0.052876	Cluster.1
27	0.714829	0.111429	0.0484347	Cluster.1
27	0.782281	0.0940638	0.0673526	Cluster.1
27	0.790132	0.0890331	0.0613799	Cluster.1
27	0.791862	0.0869328	0.0584504	Cluster.1
26.7	0.678274	0.117585	0.0473693	Cluster.1
26.7	0.686213	0.121021	0.0582625	Cluster.1
26.7	0.689745	0.11331	0.0465849	Cluster.1
26.7	0.70155	0.114735	0.0559632	Cluster.1
26.7	0.684857	0.118806	0.0539319	Cluster.1
26.7	0.728928	0.123954	0.0825091	Cluster.1
26.7	0.717458	0.113579	0.051265	Cluster.1
26.7	0.713567	0.117751	0.0549259	Cluster.1
26.7	0.716001	0.113423	0.0526156	Cluster.1
26.7	0.716813	0.113885	0.0581965	Cluster.1
26.7	0.787633	0.0981462	0.0778195	Cluster.1
26.7	0.783318	0.0855721	0.0513583	Cluster.1
26.7	0.786254	0.0849593	0.052148	Cluster.1
26.7	0.78898	0.083486	0.0504823	Cluster.1
26.7	0.789348	0.0884951	0.0602139	Cluster.1
26.1	0.723586	0.112511	0.0664812	Cluster.1
26.1	0.719237	0.105725	0.0514626	Cluster.1
26.1	0.718352	0.105016	0.0493866	Cluster.1
26.1	0.71802	0.102134	0.0431428	Cluster.1
26.1	0.692251	0.111169	0.0444269	Cluster.1
26.1	0.676474	0.136542	0.051101	Cluster.1
26.1	0.684439	0.13448	0.0407306	Cluster.1
26.1	0.680913	0.139388	0.0469485	Cluster.1
26.1	0.694692	0.125947	0.0414048	Cluster.1
26.1	0.695692	0.117753	0.0323801	Cluster.1
26.1	0.758175	0.0949603	0.0559781	Cluster.1
26.1	0.783038	0.0857513	0.0532122	Cluster.1
26.1	0.791096	0.0853078	0.0566389	Cluster.1
26.1	0.790425	0.0797559	0.0449179	Cluster.1
26.1	0.798936	0.0749509	0.0412126	Cluster.1
25.3	0.69965	0.111211	0.0475921	Cluster.1
25.3	0.700024	0.103006	0.0336623	Cluster.1
25.3	0.703225	0.103469	0.0360794	Cluster.1
25.3	0.690812	0.11255	0.0450197	Cluster.1
25.3	0.684843	0.11387	0.043465	Cluster.1
25.3	0.714161	0.120282	0.0577001	Cluster.1
25.3	0.70515	0.124885	0.0510159	Cluster.1
25.3	0.71123	0.127324	0.0654445	Cluster.1
25.3	0.712653	0.113623	0.0451424	Cluster.1
25.3	0.716683	0.104443	0.0378068	Cluster.1
25.3	0.785109	0.0873303	0.0559695	Cluster.1
25.3	0.789289	0.0863533	0.0569516	Cluster.1
25.3	0.785711	0.0936198	0.0685217	Cluster.1
25.3	0.78598	0.0818434	0.0454614	Cluster.1
25.3	0.7878	0.0763581	0.0366247	Cluster.1
25.3	0.688004	0.105742	0.0322012	Cluster.1
25.3	0.704604	0.110415	0.0497755	Cluster.1
25.3	0.674275	0.115738	0.04153	Cluster.1
25.3	0.691018	0.112147	0.0454181	Cluster.1
25.3	0.702009	0.113055	0.0528117	Cluster.1
25.3	0.719775	0.111227	0.0544768	Cluster.1
25.3	0.716107	0.12094	0.0534367	Cluster.1
25.3	0.710025	0.122104	0.0616174	Cluster.1
25.3	0.713716	0.116798	0.0588486	Cluster.1
25.3	0.714478	0.119104	0.0634609	Cluster.1
25.3	0.783334	0.0798358	0.0405451	Cluster.1
25.3	0.787641	0.0862372	0.0557508	Cluster.1
25.3	0.780627	0.0909921	0.0601417	Cluster.1
25.3	0.790662	0.0832531	0.0511075	Cluster.1
25.3	0.789044	0.0830036	0.0496795	Cluster.1
21.475	0.673186	0.0960415	0.00865694	Cluster.1
21.475	0.6592	0.110378	0.0249533	Cluster.1
21.475	0.653929	0.109307	0.0198708	Cluster.1
21.475	0.651825	0.110591	0.0210777	Cluster.1
21.475	0.650515	0.110897	0.0207811	Cluster.1
21.475	0.685551	0.0937172	0.0503983	Cluster.1
21.475	0.679902	0.0834295	0.0269798	Cluster.1
21.475	0.699595	0.0820337	0.0248557	Cluster.1
21.475	0.697544	0.0929015	0.0490586	Cluster.1
21.475	0.69992	0.0889801	0.0421759	Cluster.1
21.475	0.705555	0.0828985	0.00298505	Cluster.1
21.475	0.690765	0.0799706	-0.0108959	Cluster.1
21.475	0.707007	0.0729269	-0.0143106	Cluster.1
21.475	0.726666	0.0732677	-0.00341495	Cluster.1
21.475	0.721009	0.0734129	-0.00634921	Cluster.1
15.3042	0.657499	0.109198	0.0219053	Cluster.1
15.3042	0.649261	0.113958	0.0246063	Cluster.1
15.3042	0.642202	0.121897	0.0346207	Cluster.1
15.3042	0.655003	0.1047	0.0128616	Cluster.1
15.3042	0.655037	0.107623	0.0178071	Cluster.1
15.3042	0.685874	0.0956858	0.0550505	Cluster.1
15.3042	0.683815	0.0919873	0.0510415	Cluster.1
15.3042	0.701149	0.0868288	0.0341742	Cluster.1
15.3042	0.705587	0.0812678	0.0279191	Cluster.1
15.3042	0.705772	0.0800937	0.0319921	Cluster.1
15.3042	0.716433	0.0801398	0.00406059	Cluster.1
15.3042	0.710322	0.0823329	0.00393836	Cluster.1
15.3042	0.710733	0.0777005	-0.00389201	Cluster.1
15.3042	0.723085	0.0667835	-0.016333	Cluster.1
15.3042	0.727914	0.0671327	-0.0132327	Cluster.1
11.0917	0.652474	0.106557	0.0145367	Cluster.1
11.0917	0.664608	0.103455	0.0156701	Cluster.1
11.0917	0.66838	0.0998087	0.0119958	Cluster.1
11.0917	0.66397	0.104776	0.0179194	Cluster.1
11.0917	0.665399	0.111458	0.0306057	Cluster.1
11.0917	0.682081	0.095615	0.054654	Cluster.1
11.0917	0.679027	0.104133	0.0667993	Cluster.1
11.0917	0.684448	0.092757	0.0416077	Cluster.1
11.0917	0.693264	0.0892469	0.0399549	Cluster.1
11.0917	0.690422	0.0850123	0.0393496	Cluster.1
11.0917	0.715433	0.0787064	0.00097677	Cluster.1
11.0917	0.70415	0.0903785	0.0130921	Cluster.1
11.0917	0.714842	0.0731922	-0.0101199	Cluster.1
11.0917	0.721408	0.0687962	-0.0145668	Cluster.1
11.0917	0.729106	0.0633833	-0.0195556	Cluster.1
8.5875	0.666581	0.0972895	0.00692917	Cluster.1
8.5875	0.671839	0.0861773	-0.00876635	Cluster.1
8.5875	0.672598	0.0921062	0.00177796	Cluster.1
8.5875	0.672692	0.0945696	0.00613386	Cluster.1
8.5875	0.667445	0.0941464	0.0027106	Cluster.1
8.5875	0.708743	0.0736586	0.0513581	Cluster.1
8.5875	0.678292	0.0889801	0.0458745	Cluster.1
8.5875	0.686387	0.0917708	0.0430668	Cluster.1
8.5875	0.712775	0.0710693	0.0362292	Cluster.1
8.5875	0.712778	0.0733428	0.0423201	Cluster.1
8.5875	0.711379	0.0801784	0.000614782	Cluster.1
8.5875	0.710115	0.0725966	-0.0139631	Cluster.1
8.5875	0.715254	0.0740131	-0.00880284	Cluster.1
8.5875	0.721686	0.0654239	-0.0199545	Cluster.1
8.5875	0.724547	0.0685266	-0.0131676	Cluster.1
7.4	0.687646	0.0797134	-0.010878	Cluster.1
7.4	0.692316	0.078363	-0.0102431	Cluster.1
7.4	0.68828	0.0733759	-0.0201827	Cluster.1
7.4	0.677274	0.0775193	-0.0187749	Cluster.1
7.4	0.696847	0.075795	-0.0124606	Cluster.1
7.4	0.678773	0.0768048	0.0252177	Cluster.1
7.4	0.727947	0.0554967	0.0460856	Cluster.1
7.4	0.753723	0.0408158	0.0213126	Cluster.1
7.4	0.752464	0.0526972	0.0503298	Cluster.1
7.4	0.746949	0.0457667	0.0334533	Cluster.1
7.4	0.693686	0.0750246	-0.0171004	Cluster.1
7.4	0.71352	0.0720048	-0.0129103	Cluster.1
7.4	0.724839	0.0658224	-0.0180022	Cluster.1
7.4	0.731625	0.0713703	-0.0057045	Cluster.1
7.4	0.736305	0.0612008	-0.0209055	Cluster.1
6.66667	0.699318	0.0605752	-0.0354606	Cluster.1
6.66667	0.711722	0.0774677	-0.00120346	Cluster.1
6.66667	0.706428	0.0788502	-0.00135167	Cluster.1
6.66667	0.709897	0.0589776	-0.0331625	Cluster.1
6.66667	0.697108	0.0737617	-0.0147049	Cluster.1
6.66667	0.738103	0.0402788	0.0103884	Cluster.1
6.66667	0.746181	0.0564945	0.0410453	Cluster.1
6.66667	0.74736	0.0497327	0.0242655	Cluster.1
6.66667	0.746747	0.0528376	0.0281227	Cluster.1
6.66667	0.73516	0.0428733	0.00539549	Cluster.1
6.66667	0.71845	0.0594698	-0.0315942	Cluster.1
6.66667	0.735308	0.0702362	-0.00468854	Cluster.1
6.66667	0.738192	0.058763	-0.0235169	Cluster.1
6.66667	0.738781	0.0632783	-0.0147457	Cluster.1
6.66667	0.732264	0.0517089	-0.0382661	Cluster.1
6.2	0.702522	0.0639191	-0.028479	Cluster.1
6.2	0.703247	0.057013	-0.0391756	Cluster.1
6.2	0.699241	0.0740783	-0.0137224	Cluster.1
6.2	0.704137	0.0604683	-0.033101	Cluster.1
6.2	0.701619	0.061579	-0.0326839	Cluster.1
6.2	0.694211	0.0662365	0.00248155	Cluster.1
6.2	0.704649	0.0603019	-5.857e-05	Cluster.1
6.2	0.707313	0.0689907	0.015762	Cluster.1
6.2	0.706812	0.072306	0.0156655	Cluster.1
6.2	0.711866	0.0610561	-0.00155973	Cluster.1
6.2	0.663143	0.0760053	-0.0305408	Cluster.1
6.2	0.667057	0.0730942	-0.0334239	Cluster.1
6.2	0.671376	0.0832876	-0.0144625	Cluster.1
6.2	0.675093	0.0826798	-0.0135915	Cluster.1
6.2	0.675447	0.0744438	-0.0269666	Cluster.1
6.14792	0.710786	0.0617534	-0.0280023	Cluster.1
6.14792	0.707818	0.0537402	-0.0426122	Cluster.1
6.14792	0.728398	0.0500042	-0.039808	Cluster.1
6.14792	0.720999	0.0652037	-0.0184477	Cluster.1
6.14792	0.700071	0.069109	-0.0216894	Cluster.1
6.14792	0.713887	0.0652852	0.00764791	Cluster.1
6.14792	0.715992	0.0618201	0.00892152	Cluster.1
6.14792	0.725264	0.0624525	0.0118315	Cluster.1
6.14792	0.721484	0.0476038	-0.0117318	Cluster.1
6.14792	0.727178	0.044471	-0.0154987	Cluster.1
6.14792	0.678687	0.0785263	-0.0190259	Cluster.1
6.14792	0.67794	0.0793774	-0.0186883	Cluster.1
6.14792	0.688418	0.0781088	-0.0150074	Cluster.1
6.14792	0.682031	0.0661456	-0.0378072	Cluster.1
6.14792	0.686304	0.062127	-0.0422248	Cluster.1
6.14167	0.753177	0.057409	-0.0163111	Cluster.1
6.14167	0.723015	0.0617398	-0.0233446	Cluster.1
6.14167	0.713306	0.0654738	-0.0215486	Cluster.1
6.14167	0.737733	0.0644947	-0.0117051	Cluster.1
6.14167	0.714423	0.0649376	-0.02219	Cluster.1
6.14167	0.665311	0.0643484	-0.0161789	Cluster.1
6.14167	0.681858	0.0580789	-0.0173273	Cluster.1
6.14167	0.681691	0.0692948	0.00088471	Cluster.1
6.14167	0.683861	0.0709976	0.00531394	Cluster.1
6.14167	0.684744	0.0669367	-0.00220361	Cluster.1
6.14167	0.623572	0.0828181	-0.0379277	Cluster.1
6.14167	0.619578	0.0849082	-0.03714	Cluster.1
6.14167	0.635718	0.0869337	-0.0250979	Cluster.1
6.14167	0.642161	0.0849652	-0.024954	Cluster.1
6.14167	0.638908	0.0812284	-0.0328566	Cluster.1
6.12708	0.71007	0.0620731	-0.0279005	Cluster.1
6.12708	0.706821	0.0562417	-0.0382132	Cluster.1
6.12708	0.747887	0.0396465	-0.0465032	Cluster.1
6.12708	0.730003	0.0456384	-0.0450207	Cluster.1
6.12708	0.721471	0.0539603	-0.035179	Cluster.1
6.12708	0.732554	0.0767481	0.0265221	Cluster.1
6.12708	0.706808	0.0633524	-0.00436194	Cluster.1
6.12708	0.725274	0.0575152	-0.00212392	Cluster.1
6.12708	0.738729	0.0531766	0.00476351	Cluster.1
6.12708	0.744523	0.0492229	0.00261239	Cluster.1
6.12708	0.708012	0.0807959	-0.000851359	Cluster.1
6.12708	0.691699	0.0666138	-0.0329193	Cluster.1
6.12708	0.706058	0.063446	-0.030907	Cluster.1
6.12708	0.71077	0.0663033	-0.0237717	Cluster.1
6.12708	0.726103	0.0593611	-0.027818	Cluster.1
5.9875	0.701223	0.0561281	-0.0408939	Cluster.1
5.9875	0.709823	0.0542106	-0.0399301	Cluster.1
5.9875	0.722126	0.0500823	-0.0405934	Cluster.1
5.9875	0.705252	0.0631393	-0.0275459	Cluster.1
5.9875	0.710205	0.0552687	-0.0389811	Cluster.1
5.9875	0.722005	0.0600955	-0.00988731	Cluster.1
5.9875	0.729458	0.0562437	-0.00922643	Cluster.1
5.9875	0.740037	0.0484094	-0.0132883	Cluster.1
5.9875	0.736869	0.0505511	-0.00556536	Cluster.1
5.9875	0.753537	0.0386205	-0.00973092	Cluster.1
5.9875	0.703702	0.0622058	-0.0340822	Cluster.1
5.9875	0.698721	0.0635162	-0.0352357	Cluster.1
5.9875	0.724458	0.0535144	-0.0380322	Cluster.1
5.9875	0.716244	0.058903	-0.034182	Cluster.1
5.9875	0.751683	0.0432909	-0.0419963	Cluster.1
5.69583	0.721764	0.0509452	-0.0395908	Cluster.1
5.69583	0.740154	0.0444097	-0.0413934	Cluster.1
5.69583	0.736163	0.0417924	-0.0469481	Cluster.1
5.69583	0.716659	0.0629285	-0.0218285	Cluster.1
5.69583	0.718086	0.0676919	-0.0135819	Cluster.1
5.69583	0.725491	0.0618691	-0.000874431	Cluster.1
5.69583	0.729525	0.0632263	0.0025746	Cluster.1
5.69583	0.720445	0.056461	-0.00707787	Cluster.1
5.69583	0.736053	0.0508472	-0.00530794	Cluster.1
5.69583	0.7387	0.0464024	-0.00291298	Cluster.1
5.69583	0.713118	0.0629633	-0.0285788	Cluster.1
5.69583	0.738313	0.0553538	-0.0278235	Cluster.1
5.69583	0.729055	0.0508254	-0.0411766	Cluster.1
5.69583	0.736947	0.0481995	-0.0419894	Cluster.1
5.69583	0.746961	0.0449495	-0.0419945	Cluster.1
5.28125	0.71905	0.0503903	-0.041166	Cluster.1
5.28125	0.728813	0.0613046	-0.0183968	Cluster.1
5.28125	0.739166	0.0362285	-0.054631	Cluster.1
5.28125	0.734607	0.0368986	-0.0555509	Cluster.1
5.28125	0.727006	0.0388681	-0.0565635	Cluster.1
5.28125	0.692235	0.0797197	-0.00323135	Cluster.1
5.28125	0.691298	0.0724773	-0.0185473	Cluster.1
5.28125	0.706334	0.0670133	-0.0205527	Cluster.1
5.28125	0.717025	0.0705432	-0.00424933	Cluster.1
5.28125	0.739344	0.0469413	-0.0292269	Cluster.1
5.28125	0.70379	0.0689546	-0.0250559	Cluster.1
5.28125	0.702908	0.0609331	-0.0378335	Cluster.1
5.28125	0.717832	0.0576197	-0.0356403	Cluster.1
5.28125	0.726693	0.0608132	-0.0259324	Cluster.1
5.28125	0.741292	0.0465818	-0.0417806	Cluster.1
4.9625	0.728632	0.0361325	-0.0589672	Cluster.1
4.9625	0.739936	0.0455977	-0.038944	Cluster.1
4.9625	0.737899	0.0320769	-0.0619107	Cluster.1
4.9625	0.736635	0.0311703	-0.0640689	Cluster.1
4.9625	0.722944	0.055928	-0.0303534	Cluster.1
4.9625	0.683839	0.0692649	-0.0434763	Cluster.1
4.9625	0.672755	0.0537423	-0.071728	Cluster.1
4.9625	0.676007	0.0737113	-0.0395764	Cluster.1
4.9625	0.701176	0.0637595	-0.040252	Cluster.1
4.9625	0.720501	0.0537725	-0.0463741	Cluster.1
4.9625	0.699495	0.0650653	-0.0327587	Cluster.1
4.9625	0.708212	0.0454923	-0.0604832	Cluster.1
4.9625	0.718564	0.0612213	-0.0299112	Cluster.1
4.9625	0.733298	0.0538178	-0.0344483	Cluster.1
4.9625	0.739787	0.0527186	-0.0324402	Cluster.1
4.78333	0.737305	0.0340326	-0.0593626	Cluster.1
4.78333	0.72777	0.0500887	-0.0373522	Cluster.1
4.78333	0.731883	0.051617	-0.032844	Cluster.1
4.78333	0.734236	0.0456394	-0.0410127	Cluster.1
4.78333	0.733318	0.0457135	-0.0415596	Cluster.1
4.78333	0.68065	0.043218	-0.0845293	Cluster.1
4.78333	0.661988	0.0634581	-0.0614324	Cluster.1
4.78333	0.67056	0.0605098	-0.0638252	Cluster.1
4.78333	0.718268	0.0294879	-0.0856231	Cluster.1
4.78333	0.719369	0.0342056	-0.0819864	Cluster.1
4.78333	0.710009	0.0565819	-0.0406973	Cluster.1
4.78333	0.745435	0.0531213	-0.0297384	Cluster.1
4.78333	0.724842	0.058938	-0.0299925	Cluster.1
4.78333	0.742964	0.0418211	-0.0491741	Cluster.1
4.78333	0.752902	0.0379682	-0.0503644	Cluster.1
4.55	0.739064	0.0285297	-0.0675431	Cluster.1
4.55	0.748024	0.0265987	-0.066347	Cluster.1
4.55	0.745415	0.0383929	-0.0484045	Cluster.1
4.55	0.751935	0.040221	-0.0422999	Cluster.1
4.55	0.747042	0.0375705	-0.0493975	Cluster.1
4.55	0.669184	0.0428657	-0.0921889	Cluster.1
4.55	0.679597	0.0494822	-0.077312	Cluster.1
4.55	0.707213	0.042797	-0.0720359	Cluster.1
4.55	0.715042	0.0288534	-0.0898489	Cluster.1
4.55	0.71448	0.0336405	-0.0894228	Cluster.1
4.55	0.707674	0.0542627	-0.0458124	Cluster.1
4.55	0.721489	0.0567628	-0.0350309	Cluster.1
4.55	0.728084	0.058072	-0.0291116	Cluster.1
4.55	0.732174	0.0428921	-0.0526313	Cluster.1
4.55	0.741079	0.0380745	-0.0562043	Cluster.1
4.2375	0.728108	0.0317243	-0.0668163	Cluster.1
4.2375	0.751501	0.0209053	-0.0741761	Cluster.1
4.2375	0.754345	0.0314875	-0.0554086	Cluster.1
4.2375	0.755997	0.0340092	-0.0502979	Cluster.1
4.2375	0.75547	0.0307982	-0.056225	Cluster.1
4.2375	0.68205	0.041506	-0.0874777	Cluster.1
4.2375	0.678745	0.0406653	-0.0927443	Cluster.1
4.2375	0.692295	0.0444886	-0.0828829	Cluster.1
4.2375	0.724269	0.0277068	-0.0897748	Cluster.1
4.2375	0.721728	0.0499024	-0.068064	Cluster.1
4.2375	0.710109	0.0533429	-0.0469835	Cluster.1
4.2375	0.709717	0.0499752	-0.0525303	Cluster.1
4.2375	0.726207	0.0469866	-0.0494166	Cluster.1
4.2375	0.744854	0.0332962	-0.0626699	Cluster.1
4.2375	0.743879	0.0498455	-0.0356665	Cluster.1
4.01875	0.734899	0.0308508	-0.0651179	Cluster.1
4.01875	0.754498	0.0182884	-0.0768595	Cluster.1
4.01875	0.745332	0.0271351	-0.0664107	Cluster.1
4.01875	0.740545	0.0239552	-0.0732011	Cluster.1
4.01875	0.733724	0.0227229	-0.0779386	Cluster.1
4.01875	0.70275	0.0350812	-0.0908026	Cluster.1
4.01875	0.740916	0.0357057	-0.0714474	Cluster.1
4.01875	0.707374	0.0460887	-0.0723543	Cluster.1
4.01875	0.718222	0.0547424	-0.060983	Cluster.1
4.01875	0.741469	0.0483391	-0.0656124	Cluster.1
4.01875	0.732317	0.038879	-0.0597072	Cluster.1
4.01875	0.765398	0.0440666	-0.0340717	Cluster.1
4.01875	0.739544	0.0437406	-0.0480415	Cluster.1
4.01875	0.741639	0.0486193	-0.0389569	Cluster.1
4.01875	0.762257	0.0414248	-0.0400657	Cluster.1
3.87292	0.736647	0.0228594	-0.0763788	Cluster.1
3.87292	0.742791	0.0266745	-0.0677548	Cluster.1
3.87292	0.752532	0.0283097	-0.0608175	Cluster.1
3.87292	0.739616	0.0303907	-0.063265	Cluster.1
3.87292	0.740521	0.0275747	-0.0677064	Cluster.1
3.87292	0.759755	0.0016762	-0.105466	Cluster.1
3.87292	0.754712	0.0113897	-0.0936296	Cluster.1
3.87292	0.746601	0.0220379	-0.0774004	Cluster.1
3.87292	0.768492	0.00442882	-0.101988	Cluster.1
3.87292	0.747388	0.014508	-0.0982736	Cluster.1
3.87292	0.780466	0.00706941	-0.0878287	Cluster.1
3.87292	0.784281	-0.00200763	-0.0989967	Cluster.1
3.87292	0.776118	0.0223808	-0.0643396	Cluster.1
3.87292	0.790179	0.00639571	-0.0849408	Cluster.1
3.87292	0.77751	0.0127761	-0.0795691	Cluster.1
32.5	0.777712	0.083957	0.044557	Cluster.2
32.5	0.791492	0.0766616	0.0391113	Cluster.2
32.5	0.78787	0.0796316	0.0425867	Cluster.2
32.5	0.796105	0.0816625	0.0511828	Cluster.2
32.5	0.756153	0.0837251	0.0335652	Cluster.2
32.5	0.691029	0.0992255	0.0201703	Cluster.2
32.5	0.690943	0.103108	0.0287747	Cluster.2
32.5	0.705574	0.090739	0.0136665	Cluster.2
32.5	0.712537	0.0868657	0.0106189	Cluster.2
32.5	0.710351	0.0821788	0.00127273	Cluster.2
32.5	0.728273	0.09229	0.0329282	Cluster.2
32.5	0.723866	0.0942812	0.0335534	Cluster.2
32.5	0.740675	0.0756044	0.0104923	Cluster.2
32.5	0.747523	0.0747908	0.0134037	Cluster.2
32.5	0.742291	0.0771662	0.0153318	Cluster.2
32.5	0.671287	0.120127	0.0456288	Cluster.2
32.5	0.687047	0.112698	0.0401862	Cluster.2
32.5	0.685137	0.102189	0.0215629	Cluster.2
32.5	0.691412	0.100299	0.0227051	Cluster.2
32.5	0.697268	0.0979402	0.0226345	Cluster.2
32.5	0.704508	0.0924066	0.0207924	Cluster.2
32.5	0.678425	0.0998661	0.0201919	Cluster.2
32.5	0.683835	0.0934703	0.0119896	Cluster.2
32.5	0.691435	0.0950298	0.019323	Cluster.2
32.5	0.683854	0.105574	0.0331261	Cluster.2
32.5	0.76187	0.0785102	0.0264276	Cluster.2
32.5	0.775111	0.0794138	0.0350968	Cluster.2
32.5	0.768582	0.0746879	0.0235343	Cluster.2
32.5	0.77153	0.0814744	0.0373767	Cluster.2
32.5	0.786735	0.080638	0.0441112	Cluster.2
32.5	0.699291	0.0953855	0.0189213	Cluster.2
32.5	0.689566	0.0946122	0.0115489	Cluster.2
32.5	0.691756	0.0923605	0.00834184	Cluster.2
32.5	0.704275	0.0920927	0.0143522	Cluster.2
32.5	0.70705	0.0937508	0.0195558	Cluster.2
32.5	0.729205	0.075301	0.00519007	Cluster.2
32.5	0.73203	0.0733519	0.00305564	Cluster.2
32.5	0.729193	0.077545	0.00893762	Cluster.2
32.5	0.733092	0.0774112	0.0105085	Cluster.2
32.5	0.731202	0.0750932	0.00571914	Cluster.2
32.5	0.645836	0.11584	0.0235949	Cluster.2
32.5	0.648448	0.111855	0.0179784	Cluster.2
32.5	0.645729	0.116575	0.0246125	Cluster.2
32.5	0.648965	0.116389	0.0260902	Cluster.2
32.5	0.653335	0.114834	0.0262914	Cluster.2
32.5	0.680493	0.0932186	0.00960652	Cluster.2
32.5	0.67383	0.097012	0.0124829	Cluster.2
32.5	0.701386	0.088387	0.0122125	Cluster.2
32.5	0.675114	0.0945763	0.00963367	Cluster.2
32.5	0.719642	0.081754	0.0111064	Cluster.2
31	0.757024	0.0770202	0.0220689	Cluster.2
31	0.763834	0.076478	0.0248554	Cluster.2
31	0.758309	0.080434	0.0289841	Cluster.2
31	0.736162	0.0959084	0.0444067	Cluster.2
31	0.759459	0.0739221	0.0177124	Cluster.2
31	0.734361	0.0797378	0.0142814	Cluster.2
31	0.710649	0.0938943	0.0251569	Cluster.2
31	0.727652	0.0877407	0.0238217	Cluster.2
31	0.714721	0.0937477	0.0276374	Cluster.2
31	0.716893	0.0769137	0.000889011	Cluster.2
31	0.673187	0.0979622	0.00796162	Cluster.2
31	0.671046	0.107814	0.022342	Cluster.2
31	0.661896	0.110823	0.0231227	Cluster.2
31	0.664843	0.112218	0.0273195	Cluster.2
31	0.665951	0.0988087	0.004896	Cluster.2
31	0.633113	0.102122	-0.000214498	Cluster.2
31	0.619965	0.0992413	-0.0117778	Cluster.2
31	0.651973	0.0964984	0.00106599	Cluster.2
31	0.657916	0.0941689	0.000434438	Cluster.2
31	0.669439	0.0922165	0.00278819	Cluster.2
30.6	0.779663	0.0734098	0.0274779	Cluster.2
30.6	0.755758	0.080315	0.0270139	Cluster.2
30.6	0.74809	0.0829868	0.0276124	Cluster.2
30.6	0.768625	0.07688	0.0278912	Cluster.2
30.6	0.767468	0.075718	0.0250876	Cluster.2
30.6	0.699308	0.0906378	0.00958184	Cluster.2
30.6	0.702918	0.0947719	0.019909	Cluster.2
30.6	0.716017	0.0846597	0.00738336	Cluster.2
30.6	0.699954	0.0928977	0.0147432	Cluster.2
30.6	0.708644	0.0834466	0.00286282	Cluster.2
30.6	0.725559	0.0838085	0.0168991	Cluster.2
30.6	0.741988	0.0808137	0.0208995	Cluster.2
30.6	0.741173	0.0703817	0.00241442	Cluster.2
30.6	0.739452	0.0769263	0.0130001	Cluster.2
30.6	0.733926	0.0802649	0.0155943	Cluster.2
30.6	0.66389	0.112066	0.0258201	Cluster.2
30.6	0.673135	0.112511	0.0329721	Cluster.2
30.6	0.673606	0.0977531	0.00785537	Cluster.2
30.6	0.676777	0.102871	0.0188624	Cluster.2
30.6	0.666413	0.109859	0.0242757	Cluster.2
30.6	0.665435	0.102954	0.0180458	Cluster.2
30.6	0.662918	0.103633	0.0181197	Cluster.2
30.6	0.692482	0.0952329	0.0196547	Cluster.2
30.6	0.670565	0.101458	0.018488	Cluster.2
30.6	0.686677	0.0994894	0.0237549	Cluster.2
30.6	0.789149	0.0846509	0.0526933	Cluster.2
30.6	0.795639	0.0717574	0.0328779	Cluster.2
30.6	0.796706	0.0784795	0.0459803	Cluster.2
30.6	0.796524	0.0787713	0.046092	Cluster.2
30.6	0.796086	0.0781469	0.0446669	Cluster.2
30.6	0.712511	0.0790614	0.00327749	Cluster.2
30.6	0.73001	0.0729198	0.00141622	Cluster.2
30.6	0.723832	0.0780553	0.00661512	Cluster.2
30.6	0.713888	0.0895845	0.0214269	Cluster.2
30.6	0.713491	0.080512	0.00575396	Cluster.2
30.6	0.654811	0.106694	0.0128713	Cluster.2
30.6	0.662643	0.105261	0.0148913	Cluster.2
30.6	0.663415	0.109117	0.0214109	Cluster.2
30.6	0.664737	0.115688	0.0331461	Cluster.2
30.6	0.657375	0.110459	0.0200602	Cluster.2
30.6	0.684102	0.0912934	0.00842054	Cluster.2
30.6	0.6971	0.0857209	0.00633213	Cluster.2
30.6	0.67485	0.0954756	0.0108483	Cluster.2
30.6	0.672101	0.101921	0.0203283	Cluster.2
30.6	0.682843	0.0961905	0.0164809	Cluster.2
30.4	0.77869	0.0766803	0.0325157	Cluster.2
30.4	0.797765	0.0764594	0.0425768	Cluster.2
30.4	0.785832	0.0814785	0.0451021	Cluster.2
30.4	0.795325	0.0739228	0.0363261	Cluster.2
30.4	0.793575	0.0753687	0.0381014	Cluster.2
30.4	0.685302	0.107797	0.0332721	Cluster.2
30.4	0.711808	0.0733671	-0.0145381	Cluster.2
30.4	0.703516	0.0822936	-0.00272787	Cluster.2
30.4	0.686071	0.0993032	0.0200438	Cluster.2
30.4	0.71695	0.0784738	-0.00239252	Cluster.2
30.4	0.72717	0.0838034	0.0174821	Cluster.2
30.4	0.741742	0.0850997	0.0276525	Cluster.2
30.4	0.75125	0.0805804	0.0261933	Cluster.2
30.4	0.750862	0.0792069	0.0241878	Cluster.2
30.4	0.751586	0.0810243	0.0271697	Cluster.2
30.4	0.658588	0.115868	0.032447	Cluster.2
30.4	0.674723	0.117331	0.0430677	Cluster.2
30.4	0.663071	0.124277	0.0483574	Cluster.2
30.4	0.655056	0.128756	0.0512859	Cluster.2
30.4	0.666348	0.122925	0.0488627	Cluster.2
30.4	0.701663	0.101793	0.0357469	Cluster.2
30.4	0.672156	0.102503	0.020484	Cluster.2
30.4	0.692838	0.0937828	0.0175944	Cluster.2
30.4	0.681594	0.0990351	0.0204515	Cluster.2
30.4	0.689188	0.0932754	0.0142689	Cluster.2
29.6	0.767245	0.0801979	0.0330363	Cluster.2
29.6	0.770056	0.0823347	0.0384634	Cluster.2
29.6	0.768596	0.077803	0.0296086	Cluster.2
29.6	0.760922	0.0832872	0.0351704	Cluster.2
29.6	0.767246	0.0874468	0.0463232	Cluster.2
29.6	0.732833	0.0767937	0.00855442	Cluster.2
29.6	0.731588	0.0791997	0.0128953	Cluster.2
29.6	0.737327	0.0788397	0.015204	Cluster.2
29.6	0.738626	0.0808329	0.0199903	Cluster.2
29.6	0.720133	0.0832054	0.0138853	Cluster.2
29.6	0.664247	0.0997449	0.00899621	Cluster.2
29.6	0.689368	0.0938907	0.0115168	Cluster.2
29.6	0.676507	0.10199	0.0182071	Cluster.2
29.6	0.677262	0.107198	0.0274059	Cluster.2
29.6	0.677967	0.100625	0.0153122	Cluster.2
29.6	0.657378	0.0980368	0.00584641	Cluster.2
29.6	0.663275	0.0969699	0.00824974	Cluster.2
29.6	0.671607	0.0927305	0.0053932	Cluster.2
29.6	0.666686	0.0951078	0.00689381	Cluster.2
29.6	0.66816	0.100059	0.0159072	Cluster.2
29.4	0.786699	0.0819655	0.0469933	Cluster.2
29.4	0.78763	0.082261	0.0480812	Cluster.2
29.4	0.786468	0.0826058	0.047959	Cluster.2
29.4	0.779936	0.0902773	0.0584831	Cluster.2
29.4	0.788763	0.0914456	0.0657955	Cluster.2
29.4	0.722337	0.086462	0.020067	Cluster.2
29.4	0.696871	0.0817633	-0.00133445	Cluster.2
29.4	0.718179	0.0794966	0.0063747	Cluster.2
29.4	0.724978	0.0833522	0.015831	Cluster.2
29.4	0.727873	0.0802081	0.0120799	Cluster.2
29.4	0.664614	0.111595	0.0256782	Cluster.2
29.4	0.639435	0.109154	0.00887415	Cluster.2
29.4	0.652072	0.107873	0.0127638	Cluster.2
29.4	0.666517	0.108482	0.0220516	Cluster.2
29.4	0.662526	0.108386	0.0199559	Cluster.2
29.4	0.639482	0.116171	0.0264053	Cluster.2
29.4	0.645966	0.0971818	-0.00232586	Cluster.2
29.4	0.676558	0.0907682	0.0038435	Cluster.2
29.4	0.669436	0.0850547	-0.00962136	Cluster.2
29.4	0.679472	0.0956933	0.0138054	Cluster.2
29.3	0.781112	0.0794479	0.0386667	Cluster.2
29.3	0.779901	0.0883576	0.0545125	Cluster.2
29.3	0.769146	0.0694997	0.0144149	Cluster.2
29.3	0.807663	0.0724012	0.0407561	Cluster.2
29.3	0.796206	0.0814851	0.0513647	Cluster.2
29.3	0.728459	0.0788824	0.00976466	Cluster.2
29.3	0.723178	0.0782925	0.00604795	Cluster.2
29.3	0.720094	0.0792137	0.00625631	Cluster.2
29.3	0.713203	0.0899162	0.0206328	Cluster.2
29.3	0.731548	0.0744468	0.00384349	Cluster.2
29.3	0.650839	0.117564	0.0288619	Cluster.2
29.3	0.644066	0.118131	0.0265899	Cluster.2
29.3	0.652366	0.114178	0.0253635	Cluster.2
29.3	0.64678	0.123283	0.0366795	Cluster.2
29.3	0.67799	0.103232	0.0215282	Cluster.2
29.3	0.662551	0.0907427	-0.00388517	Cluster.2
29.3	0.666469	0.0895044	-0.00377244	Cluster.2
29.3	0.662704	0.0827892	-0.0161718	Cluster.2
29.3	0.675215	0.09079	0.00459755	Cluster.2
29.3	0.692148	0.0831903	-0.000636545	Cluster.2
29.1	0.777451	0.0744862	0.0276148	Cluster.2
29.1	0.778184	0.0768425	0.0320639	Cluster.2
29.1	0.807636	0.0716756	0.0392254	Cluster.2
29.1	0.798317	0.0737745	0.0378478	Cluster.2
29.1	0.792483	0.0663339	0.0209491	Cluster.2
29.1	0.694982	0.0829138	-0.00539524	Cluster.2
29.1	0.699479	0.0896181	0.00872469	Cluster.2
29.1	0.680408	0.110704	0.038837	Cluster.2
29.1	0.677345	0.105203	0.0230303	Cluster.2
29.1	0.675916	0.108036	0.027923	Cluster.2
29.1	0.724477	0.0774149	0.00573798	Cluster.2
29.1	0.724884	0.0809527	0.0117719	Cluster.2
29.1	0.717558	0.0770546	0.00100821	Cluster.2
29.1	0.73154	0.0798837	0.0140467	Cluster.2
29.1	0.723625	0.0842298	0.0170017	Cluster.2
29.1	0.660685	0.107584	0.0174856	Cluster.2
29.1	0.660884	0.112022	0.0247426	Cluster.2
29.1	0.656751	0.104905	0.0102637	Cluster.2
29.1	0.66951	0.108489	0.0238682	Cluster.2
29.1	0.670036	0.109037	0.0248651	Cluster.2
29.1	0.667355	0.105458	0.0238064	Cluster.2
29.1	0.673795	0.098814	0.0161937	Cluster.2
29.1	0.661058	0.0946437	0.00236799	Cluster.2
29.1	0.676583	0.0973588	0.0155779	Cluster.2
29.1	0.672231	0.0898676	0.000497614	Cluster.2
29.1	0.802351	0.0697335	0.032395	Cluster.2
29.1	0.81552	0.0622269	0.0257956	Cluster.2
29.1	0.819627	0.0582028	0.0205378	Cluster.2
29.1	0.818291	0.0572307	0.0179618	Cluster.2
29.1	0.821098	0.0664144	0.0366081	Cluster.2
29.1	0.742915	0.0833205	0.0248323	Cluster.2
29.1	0.74505	0.0784793	0.0178635	Cluster.2
29.1	0.756043	0.0770275	0.0206884	Cluster.2
29.1	0.753857	0.0750341	0.0167106	Cluster.2
29.1	0.74048	0.077987	0.0150431	Cluster.2
29.1	0.713156	0.0944205	0.0237113	Cluster.2
29.1	0.709283	0.0905375	0.0154151	Cluster.2
29.1	0.708074	0.0950784	0.0226638	Cluster.2
29.1	0.703497	0.0943835	0.0187448	Cluster.2
29.1	0.694585	0.098198	0.0206406	Cluster.2
29.1	0.670099	0.104516	0.0225652	Cluster.2
29.1	0.676949	0.10091	0.0205615	Cluster.2
29.1	0.711847	0.0861806	0.0137934	Cluster.2
29.1	0.660411	0.112389	0.0309283	Cluster.2
29.1	0.663402	0.103794	0.0180295	Cluster.2
29.1	0.790575	0.0778352	0.0409525	Cluster.2
29.1	0.778774	0.0653452	0.0118735	Cluster.2
29.1	0.807957	0.0730975	0.0418062	Cluster.2
29.1	0.798995	0.0720111	0.0351238	Cluster.2
29.1	0.807546	0.0705956	0.0373266	Cluster.2
29.1	0.744556	0.0863868	0.0307373	Cluster.2
29.1	0.756408	0.084956	0.0353472	Cluster.2
29.1	0.757139	0.0762648	0.0203298	Cluster.2
29.1	0.764396	0.0712785	0.0154131	Cluster.2
29.1	0.748348	0.0835961	0.028556	Cluster.2
29.1	0.691926	0.106142	0.0346309	Cluster.2
29.1	0.688396	0.112829	0.0438856	Cluster.2
29.1	0.722225	0.0877151	0.0178352	Cluster.2
29.1	0.715502	0.0882266	0.0151974	Cluster.2
29.1	0.721251	0.0907586	0.0226393	Cluster.2
29.1	0.662149	0.0957185	0.00455767	Cluster.2
29.1	0.652527	0.10283	0.0114687	Cluster.2
29.1	0.659103	0.104132	0.0171414	Cluster.2
29.1	0.661444	0.093449	0.000725622	Cluster.2
29.1	0.677756	0.0930899	0.00826995	Cluster.2
28.8	0.765151	0.0773159	0.0267046	Cluster.2
28.8	0.75854	0.0802038	0.0285353	Cluster.2
28.8	0.755104	0.0839186	0.033366	Cluster.2
28.8	0.756848	0.0851001	0.0362963	Cluster.2
28.8	0.763417	0.0822272	0.0344626	Cluster.2
28.8	0.726183	0.0870379	0.0227458	Cluster.2
28.8	0.731777	0.0775251	0.00959867	Cluster.2
28.8	0.735271	0.0754307	0.0083812	Cluster.2
28.8	0.73634	0.0727568	0.0043169	Cluster.2
28.8	0.733172	0.0785864	0.012744	Cluster.2
28.8	0.687876	0.10321	0.0257226	Cluster.2
28.8	0.682701	0.0996009	0.0171416	Cluster.2
28.8	0.680713	0.0981521	0.013508	Cluster.2
28.8	0.678203	0.0964992	0.0101919	Cluster.2
28.8	0.691428	0.0972679	0.018251	Cluster.2
28.8	0.670667	0.102964	0.0209212	Cluster.2
28.8	0.670948	0.0981837	0.0133607	Cluster.2
28.8	0.677094	0.0958387	0.0131533	Cluster.2
28.8	0.682282	0.085799	-0.00125036	Cluster.2
28.8	0.684726	0.0945946	0.0145464	Cluster.2
28.7	0.813632	0.06955	0.0384107	Cluster.2
28.7	0.812125	0.068017	0.034687	Cluster.2
28.7	0.813806	0.0710608	0.0413645	Cluster.2
28.7	0.814527	0.069774	0.039364	Cluster.2
28.7	0.820264	0.0669306	0.037149	Cluster.2
28.7	0.743242	0.0767445	0.013885	Cluster.2
28.7	0.740388	0.0774477	0.0131776	Cluster.2
28.7	0.746688	0.0805426	0.0223947	Cluster.2
28.7	0.753898	0.0778908	0.0220177	Cluster.2
28.7	0.754123	0.0785233	0.0237265	Cluster.2
28.7	0.70812	0.0907415	0.013935	Cluster.2
28.7	0.680518	0.105079	0.0238514	Cluster.2
28.7	0.701936	0.100381	0.0275513	Cluster.2
28.7	0.693334	0.109797	0.0391313	Cluster.2
28.7	0.696023	0.109131	0.0400149	Cluster.2
28.7	0.660498	0.0968373	0.00530562	Cluster.2
28.7	0.66794	0.109437	0.030343	Cluster.2
28.7	0.662439	0.0938426	0.00113327	Cluster.2
28.7	0.683515	0.0894996	0.00499076	Cluster.2
28.7	0.689749	0.0908943	0.0110709	Cluster.2
28.3	0.765794	0.0842549	0.0390504	Cluster.2
28.3	0.789205	0.0778188	0.0404072	Cluster.2
28.3	0.767334	0.0878573	0.0463867	Cluster.2
28.3	0.788898	0.0815229	0.0470028	Cluster.2
28.3	0.768954	0.0829992	0.0386666	Cluster.2
28.3	0.733868	0.0751697	0.00662456	Cluster.2
28.3	0.716015	0.0814713	0.00754602	Cluster.2
28.3	0.723418	0.0764495	0.00316384	Cluster.2
28.3	0.723536	0.0790088	0.00751601	Cluster.2
28.3	0.713668	0.0798691	0.00398323	Cluster.2
28.3	0.663557	0.111009	0.0248569	Cluster.2
28.3	0.657186	0.115382	0.0279582	Cluster.2
28.3	0.67589	0.101771	0.016595	Cluster.2
28.3	0.671364	0.105085	0.0191638	Cluster.2
28.3	0.657597	0.105565	0.012626	Cluster.2
28.3	0.660162	0.0966802	0.00539734	Cluster.2
28.3	0.655061	0.0953321	0.00058914	Cluster.2
28.3	0.666971	0.0818568	-0.014442	Cluster.2
28.3	0.661556	0.0836888	-0.0147844	Cluster.2
28.3	0.68173	0.0762885	-0.0163508	Cluster.2
27	0.807752	0.0700682	0.0364135	Cluster.2
27	0.804273	0.071707	0.0374382	Cluster.2
27	0.802901	0.0703637	0.0342409	Cluster.2
27	0.77427	0.0790116	0.0342433	Cluster.2
27	0.793845	0.0816649	0.0498713	Cluster.2
27	0.685845	0.0989434	0.0173489	Cluster.2
27	0.690419	0.0961579	0.0162129	Cluster.2
27	0.645877	0.116315	0.0251322	Cluster.2
27	0.666871	0.102944	0.0130718	Cluster.2
27	0.682674	0.0936535	0.00733963	Cluster.2
27	0.745743	0.0813365	0.0229428	Cluster.2
27	0.743935	0.0816796	0.0228405	Cluster.2
27	0.776276	0.0695733	0.0193893	Cluster.2
27	0.775334	0.0689771	0.0179445	Cluster.2
27	0.753983	0.082528	0.0305404	Cluster.2
27	0.684893	0.109404	0.0359841	Cluster.2
27	0.694227	0.105095	0.0326208	Cluster.2
27	0.696793	0.108416	0.0403443	Cluster.2
27	0.692041	0.10934	0.0390747	Cluster.2
27	0.700878	0.109461	0.0441861	Cluster.2
27	0.679466	0.0981513	0.016893	Cluster.2
27	0.682331	0.0995402	0.0213857	Cluster.2
27	0.66852	0.109058	0.0299926	Cluster.2
27	0.675269	0.101576	0.0208262	Cluster.2
27	0.653892	0.10527	0.0152249	Cluster.2
26.7	0.8118	0.0636258	0.0263469	Cluster.2
26.7	0.808089	0.0678839	0.0321441	Cluster.2
26.7	0.812182	0.0733021	0.0445752	Cluster.2
26.7	0.809512	0.0643593	0.0262728	Cluster.2
26.7	0.810423	0.0642395	0.0267137	Cluster.2
26.7	0.751367	0.0724343	0.0111184	Cluster.2
26.7	0.749601	0.0759797	0.0163552	Cluster.2
26.7	0.752814	0.0723639	0.0117247	Cluster.2
26.7	0.744133	0.0749981	0.0116375	Cluster.2
26.7	0.734555	0.0849431	0.023499	Cluster.2
26.7	0.712675	0.0845633	0.0077435	Cluster.2
26.7	0.707372	0.0904306	0.0146604	Cluster.2
26.7	0.707564	0.0879729	0.0104763	Cluster.2
26.7	0.701362	0.0894429	0.00960908	Cluster.2
26.7	0.703895	0.0944043	0.0189425	Cluster.2
26.7	0.657311	0.112305	0.0281434	Cluster.2
26.7	0.670265	0.112462	0.0375639	Cluster.2
26.7	0.677267	0.0983683	0.0169574	Cluster.2
26.7	0.698578	0.0976959	0.0277774	Cluster.2
26.7	0.680368	0.107939	0.0356385	Cluster.2
26.1	0.782153	0.0833989	0.0469177	Cluster.2
26.1	0.792173	0.07835	0.0430387	Cluster.2
26.1	0.800266	0.0734321	0.0387978	Cluster.2
26.1	0.796182	0.0789968	0.0469165	Cluster.2
26.1	0.794816	0.0741898	0.0371842	Cluster.2
26.1	0.678561	0.115706	0.0416498	Cluster.2
26.1	0.702476	0.0982692	0.0245212	Cluster.2
26.1	0.711533	0.0938172	0.0222354	Cluster.2
26.1	0.718074	0.100106	0.0371808	Cluster.2
26.1	0.72132	0.0882669	0.0191113	Cluster.2
26.1	0.713462	0.0996758	0.0345609	Cluster.2
26.1	0.728707	0.0935217	0.0355752	Cluster.2
26.1	0.744634	0.0928005	0.0432995	Cluster.2
26.1	0.750794	0.0889231	0.0403437	Cluster.2
26.1	0.74733	0.085725	0.0320389	Cluster.2
26.1	0.745661	0.0826221	0.026038	Cluster.2
26.1	0.663795	0.119314	0.0395699	Cluster.2
26.1	0.669716	0.122878	0.0494771	Cluster.2
26.1	0.670155	0.121267	0.0461018	Cluster.2
26.1	0.682428	0.10737	0.0285634	Cluster.2
26.1	0.677963	0.105348	0.0237913	Cluster.2
26.1	0.70363	0.115228	0.0594242	Cluster.2
26.1	0.708343	0.101302	0.0379097	Cluster.2
26.1	0.71771	0.0980642	0.0374418	Cluster.2
26.1	0.704623	0.103222	0.038983	Cluster.2
26.1	0.686841	0.11103	0.0429823	Cluster.2
25.3	0.801485	0.0700332	0.0325648	Cluster.2
25.3	0.81207	0.0677282	0.0342522	Cluster.2
25.3	0.805469	0.0696164	0.0343143	Cluster.2
25.3	0.810191	0.0678315	0.033587	Cluster.2
25.3	0.807642	0.0672705	0.0314431	Cluster.2
25.3	0.734802	0.0961243	0.0426708	Cluster.2
25.3	0.732584	0.0893754	0.0293955	Cluster.2
25.3	0.753906	0.0813904	0.0275995	Cluster.2
25.3	0.738298	0.0889714	0.0320527	Cluster.2
25.3	0.74829	0.0896302	0.0390454	Cluster.2
25.3	0.6804	0.11964	0.0493616	Cluster.2
25.3	0.698528	0.10316	0.0293727	Cluster.2
25.3	0.678046	0.118478	0.0452104	Cluster.2
25.3	0.699167	0.104493	0.0327289	Cluster.2
25.3	0.7046	0.105715	0.0379795	Cluster.2
25.3	0.67458	0.10585	0.0279169	Cluster.2
25.3	0.658712	0.106741	0.0205435	Cluster.2
25.3	0.683191	0.0966254	0.0169295	Cluster.2
25.3	0.655695	0.113463	0.0301331	Cluster.2
25.3	0.664759	0.108292	0.0266921	Cluster.2
25.3	0.7944	0.0732695	0.0347874	Cluster.2
25.3	0.806482	0.0747127	0.0440879	Cluster.2
25.3	0.806066	0.0693176	0.0340941	Cluster.2
25.3	0.817333	0.0682222	0.0383296	Cluster.2
25.3	0.813988	0.0690613	0.0381408	Cluster.2
25.3	0.72636	0.0932718	0.0324986	Cluster.2
25.3	0.754791	0.0807625	0.0267955	Cluster.2
25.3	0.682317	0.111806	0.036005	Cluster.2
25.3	0.708289	0.0999351	0.0304656	Cluster.2
25.3	0.659809	0.104044	0.0158501	Cluster.2
25.3	0.675731	0.112361	0.0396733	Cluster.2
25.3	0.674972	0.102745	0.0225508	Cluster.2
25.3	0.679116	0.106355	0.0319505	Cluster.2
25.3	0.683508	0.109733	0.0396162	Cluster.2
21.475	0.659085	0.0751989	-0.0274694	Cluster.2
21.475	0.628647	0.0986852	-0.00686454	Cluster.2
21.475	0.644307	0.0846544	-0.0213323	Cluster.2
21.475	0.679408	0.0591331	-0.0443829	Cluster.2
21.475	0.681475	0.0693152	-0.0273452	Cluster.2
21.475	0.689353	0.0896824	0.00925433	Cluster.2
21.475	0.692436	0.0920642	0.0149553	Cluster.2
21.475	0.694329	0.0852871	0.00414995	Cluster.2
21.475	0.693164	0.0864168	0.00571683	Cluster.2
21.475	0.674303	0.106797	0.0296538	Cluster.2
21.475	0.682657	0.0838565	-0.00789027	Cluster.2
21.475	0.690633	0.0786774	-0.0115383	Cluster.2
21.475	0.681443	0.0736427	-0.0246839	Cluster.2
21.475	0.706856	0.0649648	-0.026412	Cluster.2
21.475	0.694941	0.0725507	-0.0200626	Cluster.2
21.475	0.744206	0.0658282	-0.00392061	Cluster.2
21.475	0.745762	0.0672058	-0.000161488	Cluster.2
21.475	0.742063	0.0618253	-0.0108587	Cluster.2
21.475	0.756225	0.0557354	-0.0148384	Cluster.2
21.475	0.755589	0.0576443	-0.0116308	Cluster.2
21.475	0.637554	0.0801264	-0.0318092	Cluster.2
21.475	0.612856	0.100964	-0.0101736	Cluster.2
21.475	0.621912	0.089018	-0.0251271	Cluster.2
21.475	0.625196	0.0855323	-0.0290665	Cluster.2
21.475	0.619859	0.0898637	-0.0242312	Cluster.2
15.3042	0.657477	0.082852	-0.0161463	Cluster.2
15.3042	0.696311	0.0584858	-0.0376097	Cluster.2
15.3042	0.689907	0.0626833	-0.0341359	Cluster.2
15.3042	0.69154	0.0600862	-0.0378274	Cluster.2
15.3042	0.691306	0.0513388	-0.0514506	Cluster.2
15.3042	0.682728	0.0886063	0.00431645	Cluster.2
15.3042	0.693047	0.0890649	0.00995361	Cluster.2
15.3042	0.701636	0.080229	-0.000820296	Cluster.2
15.3042	0.694838	0.0818005	-0.00140059	Cluster.2
15.3042	0.686498	0.0818987	-0.00600931	Cluster.2
15.3042	0.706508	0.0704797	-0.0172609	Cluster.2
15.3042	0.70935	0.0677749	-0.0202323	Cluster.2
15.3042	0.701489	0.0599257	-0.0368366	Cluster.2
15.3042	0.713678	0.0539574	-0.0409476	Cluster.2
15.3042	0.719102	0.0635476	-0.0228074	Cluster.2
15.3042	0.747974	0.0572603	-0.0158164	Cluster.2
15.3042	0.75929	0.0531586	-0.0172599	Cluster.2
15.3042	0.75209	0.0506822	-0.0250162	Cluster.2
15.3042	0.756691	0.0469859	-0.029185	Cluster.2
15.3042	0.767629	0.0505576	-0.0179485	Cluster.2
15.3042	0.617606	0.0991565	-0.0107624	Cluster.2
15.3042	0.60933	0.105004	-0.00583671	Cluster.2
15.3042	0.60322	0.107099	-0.00540361	Cluster.2
15.3042	0.620801	0.0826221	-0.0353643	Cluster.2
15.3042	0.610912	0.0927604	-0.0229442	Cluster.2
11.0917	0.656663	0.075851	-0.0272587	Cluster.2
11.0917	0.703663	0.046511	-0.0531142	Cluster.2
11.0917	0.66847	0.0654998	-0.0394256	Cluster.2
11.0917	0.688543	0.0624498	-0.0354637	Cluster.2
11.0917	0.672807	0.0648095	-0.0380952	Cluster.2
11.0917	0.680133	0.0837755	-0.00588817	Cluster.2
11.0917	0.695523	0.0798991	-0.0050692	Cluster.2
11.0917	0.670349	0.09685	0.00969725	Cluster.2
11.0917	0.706844	0.0773757	-0.00385236	Cluster.2
11.0917	0.69511	0.0861336	0.00549149	Cluster.2
11.0917	0.714116	0.0601833	-0.0312683	Cluster.2
11.0917	0.711254	0.0594048	-0.0340715	Cluster.2
11.0917	0.704907	0.0583571	-0.0381776	Cluster.2
11.0917	0.724034	0.0571297	-0.0312527	Cluster.2
11.0917	0.719232	0.0551849	-0.0367986	Cluster.2
11.0917	0.754727	0.0483832	-0.0276182	Cluster.2
11.0917	0.76375	0.0441154	-0.0306441	Cluster.2
11.0917	0.760764	0.0460624	-0.0285911	Cluster.2
11.0917	0.766837	0.0463069	-0.025075	Cluster.2
11.0917	0.774297	0.0401168	-0.0329152	Cluster.2
11.0917	0.615289	0.0972665	-0.0147483	Cluster.2
11.0917	0.617528	0.0940638	-0.019144	Cluster.2
11.0917	0.628089	0.0855604	-0.0275783	Cluster.2
11.0917	0.630521	0.0839332	-0.0287072	Cluster.2
11.0917	0.629898	0.0966035	-0.00784034	Cluster.2
8.5875	0.674572	0.0489595	-0.0598544	Cluster.2
8.5875	0.701314	0.0483191	-0.0517301	Cluster.2
8.5875	0.689667	0.0540126	-0.0477542	Cluster.2
8.5875	0.688299	0.0559672	-0.0454571	Cluster.2
8.5875	0.676871	0.0468404	-0.0631424	Cluster.2
8.5875	0.675477	0.0854811	-0.00515078	Cluster.2
8.5875	0.67206	0.0900537	-0.000259072	Cluster.2
8.5875	0.674237	0.0898015	7.96762e-05	Cluster.2
8.5875	0.676293	0.0850495	-0.00629039	Cluster.2
8.5875	0.699985	0.0642872	-0.0277602	Cluster.2
8.5875	0.724865	0.0513028	-0.0402948	Cluster.2
8.5875	0.722856	0.0506279	-0.042818	Cluster.2
8.5875	0.716177	0.0472475	-0.0507719	Cluster.2
8.5875	0.722497	0.0530206	-0.038601	Cluster.2
8.5875	0.736489	0.0345698	-0.0620737	Cluster.2
8.5875	0.76427	0.0352813	-0.0441496	Cluster.2
8.5875	0.770649	0.0333093	-0.044756	Cluster.2
8.5875	0.765605	0.0354698	-0.0433886	Cluster.2
8.5875	0.764216	0.0456326	-0.0272465	Cluster.2
8.5875	0.775103	0.0305641	-0.049126	Cluster.2
8.5875	0.621741	0.0894197	-0.0240642	Cluster.2
8.5875	0.626563	0.0767344	-0.042173	Cluster.2
8.5875	0.637713	0.0774225	-0.0364724	Cluster.2
8.5875	0.643219	0.0723949	-0.0414707	Cluster.2
8.5875	0.635131	0.0775863	-0.0366207	Cluster.2
7.4	0.663205	0.0438852	-0.0692004	Cluster.2
7.4	0.678041	0.0373044	-0.0753248	Cluster.2
7.4	0.679592	0.0521098	-0.0539276	Cluster.2
7.4	0.689269	0.0462227	-0.0584799	Cluster.2
7.4	0.700121	0.0407186	-0.0627904	Cluster.2
7.4	0.682494	0.0610631	-0.0393735	Cluster.2
7.4	0.702418	0.0695191	-0.0177615	Cluster.2
7.4	0.721551	0.0599107	-0.025745	Cluster.2
7.4	0.707674	0.0627435	-0.0267199	Cluster.2
7.4	0.709121	0.0521868	-0.044379	Cluster.2
7.4	0.742973	0.0460834	-0.0399447	Cluster.2
7.4	0.736282	0.0352482	-0.0609023	Cluster.2
7.4	0.754279	0.0321876	-0.0584964	Cluster.2
7.4	0.760802	0.0248069	-0.0670624	Cluster.2
7.4	0.747746	0.0427593	-0.0432229	Cluster.2
7.4	0.752101	0.0463254	-0.0323018	Cluster.2
7.4	0.730127	0.0376219	-0.0537135	Cluster.2
7.4	0.772851	0.0345586	-0.0422069	Cluster.2
7.4	0.785399	0.0257546	-0.0517359	Cluster.2
7.4	0.777836	0.0389719	-0.0321019	Cluster.2
7.4	0.634208	0.0834968	-0.0286255	Cluster.2
7.4	0.639745	0.0785821	-0.0343487	Cluster.2
7.4	0.649747	0.0673571	-0.0470459	Cluster.2
7.4	0.651832	0.0640776	-0.0515915	Cluster.2
7.4	0.655501	0.0683956	-0.0424343	Cluster.2
6.66667	0.704219	0.0379214	-0.065737	Cluster.2
6.66667	0.703586	0.0380106	-0.0664005	Cluster.2
6.66667	0.710488	0.026594	-0.0809898	Cluster.2
6.66667	0.674026	0.0500548	-0.0593157	Cluster.2
6.66667	0.620215	0.0505852	-0.080379	Cluster.2
6.66667	0.706495	0.0379907	-0.0665644	Cluster.2
6.66667	0.741809	0.0345565	-0.0576374	Cluster.2
6.66667	0.747299	0.0204294	-0.0779988	Cluster.2
6.66667	0.721862	0.0448847	-0.0494605	Cluster.2
6.66667	0.721316	0.0452202	-0.0490565	Cluster.2
6.66667	0.754354	0.0356599	-0.053754	Cluster.2
6.66667	0.761353	0.0317281	-0.0564448	Cluster.2
6.66667	0.769067	0.0306404	-0.0539389	Cluster.2
6.66667	0.765425	0.0261918	-0.0629568	Cluster.2
6.66667	0.767119	0.0293537	-0.05663	Cluster.2
6.66667	0.773565	0.0274534	-0.0542758	Cluster.2
6.66667	0.778862	0.0245655	-0.0563083	Cluster.2
6.66667	0.776981	0.0255398	-0.0558492	Cluster.2
6.66667	0.772652	0.0288374	-0.0522751	Cluster.2
6.66667	0.769576	0.0293775	-0.0527943	Cluster.2
6.66667	0.662442	0.0555737	-0.0598464	Cluster.2
6.66667	0.677009	0.0721332	-0.0267507	Cluster.2
6.66667	0.676891	0.0699273	-0.0302132	Cluster.2
6.66667	0.677549	0.051422	-0.0598211	Cluster.2
6.66667	0.662285	0.0702838	-0.0362456	Cluster.2
6.2	0.654393	0.0489405	-0.0681816	Cluster.2
6.2	0.6778	0.0377571	-0.0756945	Cluster.2
6.2	0.67612	0.0383971	-0.0757503	Cluster.2
6.2	0.685604	0.0346343	-0.0776688	Cluster.2
6.2	0.666725	0.0431809	-0.0716775	Cluster.2
6.2	0.7171	0.0259052	-0.0803708	Cluster.2
6.2	0.71673	0.0209724	-0.0884186	Cluster.2
6.2	0.716566	0.0317795	-0.0717011	Cluster.2
6.2	0.716749	0.0305146	-0.0730197	Cluster.2
6.2	0.722116	0.0262159	-0.0781981	Cluster.2
6.2	0.734492	0.0234136	-0.0808149	Cluster.2
6.2	0.729611	0.024845	-0.0811221	Cluster.2
6.2	0.739568	0.0208015	-0.083171	Cluster.2
6.2	0.735907	0.0203333	-0.0858583	Cluster.2
6.2	0.747869	0.0163505	-0.086879	Cluster.2
6.2	0.736828	0.0214163	-0.0783119	Cluster.2
6.2	0.735542	0.0219398	-0.0783324	Cluster.2
6.2	0.738251	0.0218527	-0.0773064	Cluster.2
6.2	0.734766	0.0215846	-0.0790298	Cluster.2
6.2	0.737441	0.019106	-0.0824097	Cluster.2
6.2	0.662844	0.0548702	-0.0602284	Cluster.2
6.2	0.658471	0.0499292	-0.0700208	Cluster.2
6.2	0.660912	0.0692881	-0.0381779	Cluster.2
6.2	0.665921	0.0527386	-0.0625031	Cluster.2
6.2	0.664779	0.0550077	-0.0592238	Cluster.2
6.14792	0.665842	0.0443334	-0.0699285	Cluster.2
6.14792	0.677714	0.0425304	-0.068758	Cluster.2
6.14792	0.6776	0.0523677	-0.0536935	Cluster.2
6.14792	0.670249	0.0534369	-0.0555374	Cluster.2
6.14792	0.682634	0.0297702	-0.0859215	Cluster.2
6.14792	0.713894	0.0202399	-0.0895574	Cluster.2
6.14792	0.719772	0.0203693	-0.0864073	Cluster.2
6.14792	0.726854	0.0183994	-0.0880768	Cluster.2
6.14792	0.748583	0.00606477	-0.0997378	Cluster.2
6.14792	0.71638	0.0176043	-0.092727	Cluster.2
6.14792	0.753157	0.0187171	-0.0807779	Cluster.2
6.14792	0.750471	0.0344321	-0.0555653	Cluster.2
6.14792	0.759007	0.0311703	-0.0577144	Cluster.2
6.14792	0.753883	0.0269162	-0.0671258	Cluster.2
6.14792	0.754816	0.0265134	-0.0677588	Cluster.2
6.14792	0.739319	0.0219764	-0.0770754	Cluster.2
6.14792	0.729483	0.0447418	-0.0437799	Cluster.2
6.14792	0.739427	0.0386328	-0.0500828	Cluster.2
6.14792	0.746003	0.030534	-0.0608238	Cluster.2
6.14792	0.739007	0.0312604	-0.0627161	Cluster.2
6.14792	0.675724	0.0526934	-0.0585356	Cluster.2
6.14792	0.674476	0.0444944	-0.0718267	Cluster.2
6.14792	0.69311	0.0371256	-0.0759877	Cluster.2
6.14792	0.679119	0.0568774	-0.0504043	Cluster.2
6.14792	0.660307	0.0622844	-0.0498349	Cluster.2
6.14167	0.66723	0.0348869	-0.0854727	Cluster.2
6.14167	0.673857	0.0452322	-0.0674101	Cluster.2
6.14167	0.668995	0.0484569	-0.0644133	Cluster.2
6.14167	0.667139	0.0325324	-0.0887602	Cluster.2
6.14167	0.680762	0.0392998	-0.0724691	Cluster.2
6.14167	0.723925	0.0304502	-0.0706842	Cluster.2
6.14167	0.717161	0.027744	-0.0770912	Cluster.2
6.14167	0.710931	0.0323942	-0.072786	Cluster.2
6.14167	0.73063	0.033187	-0.0634936	Cluster.2
6.14167	0.713283	0.0312382	-0.0735121	Cluster.2
6.14167	0.727408	0.0257253	-0.0811495	Cluster.2
6.14167	0.73633	0.0228288	-0.0814567	Cluster.2
6.14167	0.737353	0.0314036	-0.0672382	Cluster.2
6.14167	0.741225	0.0317443	-0.0645566	Cluster.2
6.14167	0.736801	0.0370741	-0.057816	Cluster.2
6.14167	0.733564	0.026047	-0.0720315	Cluster.2
6.14167	0.740229	0.0242341	-0.0727643	Cluster.2
6.14167	0.734941	0.0343335	-0.0586465	Cluster.2
6.14167	0.736861	0.0374	-0.0529919	Cluster.2
6.14167	0.730007	0.0395294	-0.0525439	Cluster.2
6.14167	0.705885	0.0480889	-0.0528253	Cluster.2
6.14167	0.678091	0.0524846	-0.0578501	Cluster.2
6.14167	0.666481	0.0577745	-0.054287	Cluster.2
6.14167	0.69157	0.0556524	-0.0466624	Cluster.2
6.14167	0.671751	0.0569802	-0.0530886	Cluster.2
6.12708	0.659988	0.0534371	-0.0591663	Cluster.2
6.12708	0.67346	0.0448516	-0.067538	Cluster.2
6.12708	0.669078	0.0340568	-0.0849809	Cluster.2
6.12708	0.666348	0.048171	-0.0650934	Cluster.2
6.12708	0.67299	0.0333306	-0.0829778	Cluster.2
6.12708	0.710729	0.0175267	-0.0949851	Cluster.2
6.12708	0.728135	0.0194295	-0.0864182	Cluster.2
6.12708	0.739463	0.0166795	-0.0853811	Cluster.2
6.12708	0.728147	0.0055354	-0.107354	Cluster.2
6.12708	0.758146	-0.00952543	-0.120179	Cluster.2
6.12708	0.758956	0.0204807	-0.075109	Cluster.2
6.12708	0.764363	0.0207903	-0.0726042	Cluster.2
6.12708	0.772299	0.0167652	-0.0757584	Cluster.2
6.12708	0.771891	0.025008	-0.0614394	Cluster.2
6.12708	0.775922	0.00862248	-0.0875188	Cluster.2
6.12708	0.736579	0.0280374	-0.0689497	Cluster.2
6.12708	0.739516	0.0276404	-0.0685819	Cluster.2
6.12708	0.753112	0.0223157	-0.0719853	Cluster.2
6.12708	0.74461	0.0351946	-0.0541085	Cluster.2
6.12708	0.762458	0.0134698	-0.0827694	Cluster.2
6.12708	0.675727	0.0541401	-0.0557	Cluster.2
6.12708	0.669607	0.0490054	-0.0663429	Cluster.2
6.12708	0.719855	0.0239701	-0.0852107	Cluster.2
6.12708	0.697081	0.0350785	-0.0769941	Cluster.2
6.12708	0.688539	0.04312	-0.0673828	Cluster.2
5.9875	0.670981	0.0365139	-0.0798737	Cluster.2
5.9875	0.688448	0.0305958	-0.0828399	Cluster.2
5.9875	0.67788	0.0381112	-0.0759959	Cluster.2
5.9875	0.636823	0.0481192	-0.0765072	Cluster.2
5.9875	0.654686	0.0419912	-0.0755613	Cluster.2
5.9875	0.740349	-0.000849042	-0.111854	Cluster.2
5.9875	0.73497	0.0102773	-0.0975444	Cluster.2
5.9875	0.728266	0.015188	-0.0915343	Cluster.2
5.9875	0.723449	0.0243448	-0.0792212	Cluster.2
5.9875	0.719056	0.00383933	-0.111872	Cluster.2
5.9875	0.757923	0.0298472	-0.0601789	Cluster.2
5.9875	0.763422	0.0184218	-0.0768027	Cluster.2
5.9875	0.770143	0.0128222	-0.082851	Cluster.2
5.9875	0.769129	0.018249	-0.0746326	Cluster.2
5.9875	0.768785	0.00854791	-0.0897127	Cluster.2
5.9875	0.733979	0.0387268	-0.0527249	Cluster.2
5.9875	0.736928	0.0261842	-0.0722166	Cluster.2
5.9875	0.74327	0.021992	-0.0763998	Cluster.2
5.9875	0.74951	0.0262869	-0.0676503	Cluster.2
5.9875	0.766497	0.0110277	-0.0855538	Cluster.2
5.9875	0.669115	0.0461013	-0.0710893	Cluster.2
5.9875	0.679404	0.0413142	-0.0746018	Cluster.2
5.9875	0.688007	0.0352677	-0.0793082	Cluster.2
5.9875	0.680154	0.0513555	-0.0580196	Cluster.2
5.9875	0.672348	0.0476317	-0.0666783	Cluster.2
5.69583	0.66187	0.0379798	-0.0800722	Cluster.2
5.69583	0.663375	0.0425883	-0.0732683	Cluster.2
5.69583	0.67976	0.0386948	-0.074249	Cluster.2
5.69583	0.654014	0.0401633	-0.0801906	Cluster.2
5.69583	0.670388	0.02896	-0.0901968	Cluster.2
5.69583	0.722908	0.0110943	-0.097958	Cluster.2
5.69583	0.726423	0.00857815	-0.101934	Cluster.2
5.69583	0.726782	-0.00243953	-0.119055	Cluster.2
5.69583	0.720906	0.00919914	-0.102874	Cluster.2
5.69583	0.706192	0.0219091	-0.0872826	Cluster.2
5.69583	0.754787	0.0142432	-0.0876885	Cluster.2
5.69583	0.771031	0.00673139	-0.0934248	Cluster.2
5.69583	0.763894	0.0169707	-0.0781788	Cluster.2
5.69583	0.769105	0.0220062	-0.0679089	Cluster.2
5.69583	0.766935	0.0184828	-0.0751814	Cluster.2
5.69583	0.745568	0.0111324	-0.0924487	Cluster.2
5.69583	0.764602	0.00779091	-0.0904474	Cluster.2
5.69583	0.743828	0.0216823	-0.076853	Cluster.2
5.69583	0.759027	0.0255758	-0.0645879	Cluster.2
5.69583	0.776512	0.0141385	-0.076347	Cluster.2
5.69583	0.690395	0.0391204	-0.0711375	Cluster.2
5.69583	0.704524	0.0346459	-0.0732463	Cluster.2
5.69583	0.706597	0.0322121	-0.0761947	Cluster.2
5.69583	0.687055	0.0490752	-0.0573192	Cluster.2
5.69583	0.692336	0.0525511	-0.0490959	Cluster.2
5.28125	0.667107	0.0436381	-0.0701221	Cluster.2
5.28125	0.684934	0.0395671	-0.0704511	Cluster.2
5.28125	0.666105	0.0394823	-0.0770271	Cluster.2
5.28125	0.688015	0.03446	-0.0753007	Cluster.2
5.28125	0.68217	0.0292966	-0.0848026	Cluster.2
5.28125	0.70587	0.00754731	-0.108895	Cluster.2
5.28125	0.728644	-0.0128858	-0.134705	Cluster.2
5.28125	0.722708	-0.00466414	-0.123324	Cluster.2
5.28125	0.739388	-0.0103377	-0.1261	Cluster.2
5.28125	0.732443	-0.0063703	-0.121661	Cluster.2
5.28125	0.755706	0.0185759	-0.0803176	Cluster.2
5.28125	0.748583	0.0206744	-0.0801305	Cluster.2
5.28125	0.752697	0.0192082	-0.0802983	Cluster.2
5.28125	0.76937	0.0218924	-0.0678132	Cluster.2
5.28125	0.76701	0.0280369	-0.0589211	Cluster.2
5.28125	0.75407	0.0141502	-0.084212	Cluster.2
5.28125	0.747974	0.0168781	-0.0824585	Cluster.2
5.28125	0.74941	0.0169366	-0.081889	Cluster.2
5.28125	0.767464	0.0218384	-0.0665335	Cluster.2
5.28125	0.783011	0.0216993	-0.0607644	Cluster.2
5.28125	0.699183	0.0369781	-0.0707495	Cluster.2
5.28125	0.702095	0.0520122	-0.0452249	Cluster.2
5.28125	0.711125	0.0228146	-0.088411	Cluster.2
5.28125	0.71153	0.0214901	-0.0907025	Cluster.2
5.28125	0.699814	0.0228318	-0.0919363	Cluster.2
4.9625	0.687001	0.0294579	-0.0844671	Cluster.2
4.9625	0.680807	0.0358133	-0.0778236	Cluster.2
4.9625	0.660338	0.0433798	-0.0738353	Cluster.2
4.9625	0.652659	0.0435063	-0.0762678	Cluster.2
4.9625	0.682922	0.0218056	-0.093737	Cluster.2
4.9625	0.70884	0.00481857	-0.114361	Cluster.2
4.9625	0.717573	0.00391598	-0.1115	Cluster.2
4.9625	0.72148	0.0143943	-0.0946111	Cluster.2
4.9625	0.716866	0.0176717	-0.0909011	Cluster.2
4.9625	0.723572	-0.00621076	-0.125292	Cluster.2
4.9625	0.757185	0.0213802	-0.0742293	Cluster.2
4.9625	0.753436	0.0211845	-0.0763109	Cluster.2
4.9625	0.758894	0.0131355	-0.0872568	Cluster.2
4.9625	0.760618	0.0125334	-0.0876982	Cluster.2
4.9625	0.761979	0.0123526	-0.0865924	Cluster.2
4.9625	0.752139	0.0187821	-0.0772761	Cluster.2
4.9625	0.754486	0.0193426	-0.0755877	Cluster.2
4.9625	0.772394	0.00561617	-0.0911446	Cluster.2
4.9625	0.772483	0.00519143	-0.0921728	Cluster.2
4.9625	0.779373	0.00619276	-0.0878778	Cluster.2
4.9625	0.7107	0.0197104	-0.0933312	Cluster.2
4.9625	0.718618	0.0312443	-0.0719921	Cluster.2
4.9625	0.713869	0.017481	-0.0953543	Cluster.2
4.9625	0.721621	0.0149071	-0.0964237	Cluster.2
4.9625	0.700541	0.0390088	-0.0662929	Cluster.2
4.78333	0.66696	0.0428815	-0.0714561	Cluster.2
4.78333	0.694127	0.0199307	-0.0945983	Cluster.2
4.78333	0.687278	0.0242196	-0.0916021	Cluster.2
4.78333	0.676081	0.0264982	-0.0919704	Cluster.2
4.78333	0.664562	0.030356	-0.0889117	Cluster.2
4.78333	0.713264	0.00976925	-0.101081	Cluster.2
4.78333	0.713394	0.00781358	-0.107895	Cluster.2
4.78333	0.716264	-0.00364496	-0.122763	Cluster.2
4.78333	0.705836	-0.0055697	-0.129063	Cluster.2
4.78333	0.724512	-0.0219131	-0.14832	Cluster.2
4.78333	0.754454	0.0123765	-0.0889977	Cluster.2
4.78333	0.762398	0.0181463	-0.0766934	Cluster.2
4.78333	0.761083	0.0104582	-0.0898456	Cluster.2
4.78333	0.770366	0.00903795	-0.0883011	Cluster.2
4.78333	0.769131	0.0116122	-0.0838253	Cluster.2
4.78333	0.757163	0.00631386	-0.0958528	Cluster.2
4.78333	0.756495	0.0147371	-0.0824604	Cluster.2
4.78333	0.773345	0.00436072	-0.0929536	Cluster.2
4.78333	0.782819	0.00194231	-0.0931822	Cluster.2
4.78333	0.787037	0.00348656	-0.0890426	Cluster.2
4.78333	0.714349	0.0195892	-0.0918702	Cluster.2
4.78333	0.695894	0.0361937	-0.0725007	Cluster.2
4.78333	0.712335	0.0408833	-0.0582334	Cluster.2
4.78333	0.71895	0.0231433	-0.0843486	Cluster.2
4.78333	0.708258	0.0264297	-0.0835951	Cluster.2
4.55	0.68306	0.0310102	-0.0831916	Cluster.2
4.55	0.69988	0.0171946	-0.0982356	Cluster.2
4.55	0.694452	0.0210567	-0.0944174	Cluster.2
4.55	0.673264	0.0258732	-0.0945817	Cluster.2
4.55	0.681575	0.0220216	-0.0968077	Cluster.2
4.55	0.714639	0.00594061	-0.108175	Cluster.2
4.55	0.719573	-0.00747599	-0.129647	Cluster.2
4.55	0.729278	0.016311	-0.0873541	Cluster.2
4.55	0.721348	0.0140343	-0.0947901	Cluster.2
4.55	0.709225	0.00877483	-0.105737	Cluster.2
4.55	0.774862	0.00258185	-0.0947266	Cluster.2
4.55	0.782694	0.000780908	-0.0960088	Cluster.2
4.55	0.77561	0.00136819	-0.0970644	Cluster.2
4.55	0.780911	0.00225383	-0.0937978	Cluster.2
4.55	0.78816	0.0296991	-0.0436987	Cluster.2
4.55	0.763337	0.000561931	-0.102022	Cluster.2
4.55	0.774721	-0.0024528	-0.103269	Cluster.2
4.55	0.771623	0.000729281	-0.0991693	Cluster.2
4.55	0.778274	-0.000913431	-0.0994814	Cluster.2
4.55	0.785755	0.0267627	-0.0499349	Cluster.2
4.55	0.715936	0.0146002	-0.0987505	Cluster.2
4.55	0.725348	0.00903824	-0.104173	Cluster.2
4.55	0.716877	0.0220377	-0.0867956	Cluster.2
4.55	0.727307	0.0180215	-0.0893907	Cluster.2
4.55	0.714882	0.0230789	-0.0857169	Cluster.2
4.2375	0.669088	0.0368887	-0.0802666	Cluster.2
4.2375	0.689334	0.0287329	-0.0851556	Cluster.2
4.2375	0.686237	0.0213484	-0.097801	Cluster.2
4.2375	0.670334	0.0237544	-0.0992361	Cluster.2
4.2375	0.686439	0.0133893	-0.10775	Cluster.2
4.2375	0.712138	-0.00846217	-0.131732	Cluster.2
4.2375	0.712597	0.00375666	-0.112436	Cluster.2
4.2375	0.717671	0.00266936	-0.113321	Cluster.2
4.2375	0.716481	0.00495025	-0.110043	Cluster.2
4.2375	0.735871	-0.00383571	-0.116821	Cluster.2
4.2375	0.768083	0.0128791	-0.0815601	Cluster.2
4.2375	0.768069	0.0142818	-0.0787423	Cluster.2
4.2375	0.775496	0.0109554	-0.0813156	Cluster.2
4.2375	0.784929	0.00935064	-0.0802159	Cluster.2
4.2375	0.78598	-0.000126366	-0.0952097	Cluster.2
4.2375	0.762407	0.0124323	-0.0830661	Cluster.2
4.2375	0.758832	0.0127517	-0.0840442	Cluster.2
4.2375	0.760548	0.00948646	-0.0887346	Cluster.2
4.2375	0.779225	0.00990644	-0.0811188	Cluster.2
4.2375	0.787707	-0.00347817	-0.0998984	Cluster.2
4.2375	0.696837	0.0202518	-0.0974089	Cluster.2
4.2375	0.7203	0.00705525	-0.109079	Cluster.2
4.2375	0.722534	0.0171919	-0.0922374	Cluster.2
4.2375	0.722052	0.0156381	-0.0953755	Cluster.2
4.2375	0.718728	0.0176269	-0.0930745	Cluster.2
4.01875	0.659473	0.0311801	-0.0917414	Cluster.2
4.01875	0.680804	0.0372821	-0.0760494	Cluster.2
4.01875	0.661393	0.0363558	-0.0858189	Cluster.2
4.01875	0.641377	0.0414858	-0.0858933	Cluster.2
4.01875	0.695392	0.00953176	-0.110686	Cluster.2
4.01875	0.724633	-0.00982173	-0.129308	Cluster.2
4.01875	0.719685	0.00396255	-0.108897	Cluster.2
4.01875	0.731674	-0.0140616	-0.13364	Cluster.2
4.01875	0.714625	-0.0110221	-0.13465	Cluster.2
4.01875	0.702295	-0.00904445	-0.133725	Cluster.2
4.01875	0.77355	0.0144263	-0.0760459	Cluster.2
4.01875	0.769632	0.0120539	-0.0802632	Cluster.2
4.01875	0.775774	0.00365967	-0.0930324	Cluster.2
4.01875	0.786534	0.00177906	-0.091348	Cluster.2
4.01875	0.787114	0.00134957	-0.0919296	Cluster.2
4.01875	0.764101	0.0124849	-0.082302	Cluster.2
4.01875	0.756861	0.0133055	-0.0836774	Cluster.2
4.01875	0.761582	0.00220368	-0.100614	Cluster.2
4.01875	0.770877	0.00367996	-0.0945318	Cluster.2
4.01875	0.795618	-0.00307502	-0.096187	Cluster.2
4.01875	0.700248	0.0208748	-0.0947402	Cluster.2
4.01875	0.716819	0.00566202	-0.112031	Cluster.2
4.01875	0.708742	0.0148514	-0.101146	Cluster.2
4.01875	0.703404	0.0110846	-0.108951	Cluster.2
4.01875	0.698925	0.0143038	-0.105009	Cluster.2
3.87292	0.673165	0.0364448	-0.0797924	Cluster.2
3.87292	0.66871	0.0329522	-0.0878648	Cluster.2
3.87292	0.689797	0.0115308	-0.111346	Cluster.2
3.87292	0.661295	0.0373324	-0.0832822	Cluster.2
3.87292	0.730997	-0.0286463	-0.155963	Cluster.2
3.87292	0.722592	-0.000599968	-0.116167	Cluster.2
3.87292	0.718726	-0.00133733	-0.118498	Cluster.2
3.87292	0.732159	-0.0110999	-0.129598	Cluster.2
3.87292	0.729111	-0.0118785	-0.13194	Cluster.2
3.87292	0.708171	0.00781279	-0.111979	Cluster.2
3.87292	0.708872	0.0150518	-0.100464	Cluster.2
3.87292	0.71426	0.0147103	-0.0990943	Cluster.2
3.87292	0.705802	0.019388	-0.0946006	Cluster.2
3.87292	0.710911	0.0148236	-0.0996998	Cluster.2
32.5	0.654603	0.121056	0.0401031	Cluster.3
32.5	0.665292	0.12814	0.0588196	Cluster.3
32.5	0.643053	0.133317	0.0556519	Cluster.3
32.5	0.610671	0.144001	0.0549387	Cluster.3
32.5	0.607117	0.145169	0.0544511	Cluster.3
32.5	0.566689	0.159278	0.0552072	Cluster.3
32.5	0.583494	0.149193	0.0479658	Cluster.3
32.5	0.574164	0.146925	0.038953	Cluster.3
32.5	0.574433	0.148515	0.0419828	Cluster.3
32.5	0.596705	0.138132	0.0370888	Cluster.3
31	0.629928	0.132792	0.0475363	Cluster.3
31	0.638261	0.120961	0.0319819	Cluster.3
31	0.620934	0.129407	0.0370297	Cluster.3
31	0.608745	0.146296	0.0573234	Cluster.3
31	0.544348	0.162005	0.0475516	Cluster.3
30.6	0.65653	0.122536	0.0439184	Cluster.3
30.6	0.654316	0.125064	0.0468715	Cluster.3
30.6	0.621091	0.13476	0.0449451	Cluster.3
30.6	0.638211	0.136084	0.055761	Cluster.3
30.6	0.644403	0.135423	0.0588677	Cluster.3
30.6	0.553699	0.146677	0.027677	Cluster.3
30.6	0.556895	0.14322	0.0242114	Cluster.3
30.6	0.600649	0.131571	0.0289145	Cluster.3
30.6	0.576044	0.147499	0.0409055	Cluster.3
30.6	0.562978	0.152831	0.0425326	Cluster.3
30.4	0.655157	0.122089	0.04177	Cluster.3
30.4	0.644067	0.134659	0.0576702	Cluster.3
30.4	0.587496	0.139943	0.0342116	Cluster.3
30.4	0.611349	0.147422	0.0605347	Cluster.3
30.4	0.602552	0.141104	0.0453241	Cluster.3
29.6	0.575009	0.129471	0.00909938	Cluster.3
29.6	0.640006	0.130765	0.0497841	Cluster.3
29.6	0.605346	0.135707	0.0386838	Cluster.3
29.6	0.60843	0.140776	0.0490608	Cluster.3
29.6	0.593989	0.141176	0.041443	Cluster.3
29.4	0.577811	0.14376	0.0370181	Cluster.3
29.4	0.560729	0.14792	0.032619	Cluster.3
29.4	0.571843	0.151083	0.0452997	Cluster.3
29.4	0.592275	0.135715	0.0314035	Cluster.3
29.4	0.599722	0.131235	0.027916	Cluster.3
29.3	0.552624	0.154778	0.0405003	Cluster.3
29.3	0.547411	0.144265	0.021196	Cluster.3
29.3	0.563963	0.148002	0.0355617	Cluster.3
29.3	0.524677	0.173086	0.0538766	Cluster.3
29.3	0.525979	0.170281	0.0497234	Cluster.3
29.1	0.619419	0.128923	0.0336127	Cluster.3
29.1	0.631297	0.130203	0.0429305	Cluster.3
29.1	0.633766	0.128903	0.0418255	Cluster.3
29.1	0.623302	0.125249	0.0294293	Cluster.3
29.1	0.64863	0.123998	0.0422815	Cluster.3
29.1	0.651026	0.123823	0.0432678	Cluster.3
29.1	0.626221	0.126452	0.033794	Cluster.3
29.1	0.646095	0.128795	0.0492015	Cluster.3
29.1	0.642826	0.140284	0.0673177	Cluster.3
29.1	0.617746	0.142711	0.0566683	Cluster.3
29.1	0.644849	0.120898	0.0347363	Cluster.3
29.1	0.607155	0.148166	0.058107	Cluster.3
29.1	0.644192	0.133308	0.0562524	Cluster.3
29.1	0.635816	0.13169	0.0489713	Cluster.3
29.1	0.646617	0.1233	0.0404966	Cluster.3
28.8	0.642763	0.119084	0.0310904	Cluster.3
28.8	0.620045	0.135191	0.045199	Cluster.3
28.8	0.613294	0.138426	0.0470127	Cluster.3
28.8	0.600008	0.140634	0.0428025	Cluster.3
28.8	0.620627	0.135763	0.0470759	Cluster.3
28.7	0.654018	0.13188	0.0585988	Cluster.3
28.7	0.641501	0.130204	0.0483609	Cluster.3
28.7	0.623404	0.128321	0.035487	Cluster.3
28.7	0.609304	0.146661	0.0580086	Cluster.3
28.7	0.613374	0.148279	0.0632878	Cluster.3
28.3	0.629992	0.137766	0.0559938	Cluster.3
28.3	0.527628	0.165255	0.0425355	Cluster.3
28.3	0.527993	0.160272	0.0356078	Cluster.3
28.3	0.557271	0.14733	0.0309298	Cluster.3
28.3	0.545687	0.153524	0.0349254	Cluster.3
27	0.650052	0.134034	0.0596865	Cluster.3
27	0.608133	0.145322	0.0550872	Cluster.3
27	0.631984	0.135743	0.0532332	Cluster.3
27	0.638246	0.137144	0.060067	Cluster.3
27	0.612119	0.145529	0.05847	Cluster.3
26.7	0.630704	0.136084	0.0533574	Cluster.3
26.7	0.598537	0.150103	0.0585104	Cluster.3
26.7	0.583485	0.157655	0.0631576	Cluster.3
26.7	0.572533	0.149617	0.0438485	Cluster.3
26.7	0.568647	0.15124	0.0439136	Cluster.3
26.1	0.646481	0.145338	0.0772029	Cluster.3
26.1	0.642382	0.125229	0.040753	Cluster.3
26.1	0.649906	0.123548	0.0431394	Cluster.3
26.1	0.641149	0.1198	0.0318818	Cluster.3
26.1	0.678093	0.115406	0.045519	Cluster.3
25.3	0.633694	0.13296	0.0475255	Cluster.3
25.3	0.623328	0.152208	0.074806	Cluster.3
25.3	0.630634	0.146797	0.0704855	Cluster.3
25.3	0.657245	0.127065	0.05194	Cluster.3
25.3	0.632966	0.141306	0.0623378	Cluster.3
25.3	0.606955	0.158718	0.0752337	Cluster.3
25.3	0.639082	0.135091	0.0560259	Cluster.3
21.475	0.497447	0.15277	0.0120619	Cluster.3
21.475	0.452136	0.179258	0.0276893	Cluster.3
21.475	0.466771	0.169803	0.0214473	Cluster.3
21.475	0.456682	0.176624	0.0258621	Cluster.3
21.475	0.490622	0.152715	0.00895917	Cluster.3
15.3042	0.469414	0.171753	0.0256859	Cluster.3
15.3042	0.484403	0.162304	0.0196822	Cluster.3
15.3042	0.479365	0.151878	0.00203367	Cluster.3
15.3042	0.485557	0.1637	0.0225682	Cluster.3
15.3042	0.476969	0.157255	0.00846633	Cluster.3
11.0917	0.539551	0.143726	0.0198599	Cluster.3
11.0917	0.512375	0.146464	0.0102687	Cluster.3
11.0917	0.525405	0.141272	0.00946651	Cluster.3
11.0917	0.531299	0.130308	-0.00451886	Cluster.3
11.0917	0.517772	0.135645	-0.00316814	Cluster.3
8.5875	0.48986	0.144882	-0.00318404	Cluster.3
8.5875	0.506585	0.142929	0.00198798	Cluster.3
8.5875	0.506467	0.144532	0.00456309	Cluster.3
8.5875	0.517411	0.145294	0.0116165	Cluster.3
8.5875	0.506356	0.146483	0.00805979	Cluster.3
7.4	0.49932	0.118058	-0.0351537	Cluster.3
7.4	0.508482	0.12368	-0.0249564	Cluster.3
7.4	0.515762	0.122319	-0.0234704	Cluster.3
7.4	0.510376	0.124359	-0.0215495	Cluster.3
7.4	0.526711	0.119782	-0.0201694	Cluster.3
6.66667	0.532641	0.10579	-0.0373652	Cluster.3
6.66667	0.539271	0.108077	-0.0316886	Cluster.3
6.66667	0.541013	0.101882	-0.0399488	Cluster.3
6.66667	0.540257	0.102313	-0.0392743	Cluster.3
6.66667	0.532144	0.0899996	-0.0601933	Cluster.3
6.2	0.510996	0.10837	-0.0451811	Cluster.3
6.2	0.526131	0.105537	-0.0421515	Cluster.3
6.2	0.491961	0.119371	-0.0374483	Cluster.3
6.2	0.511122	0.103001	-0.0519829	Cluster.3
6.2	0.490224	0.119793	-0.0385855	Cluster.3
6.14792	0.496112	0.116481	-0.03839	Cluster.3
6.14792	0.503377	0.114447	-0.0386203	Cluster.3
6.14792	0.511458	0.114374	-0.0352757	Cluster.3
6.14792	0.545873	0.0969305	-0.0449159	Cluster.3
6.14792	0.528296	0.103787	-0.0416914	Cluster.3
6.14167	0.545484	0.0921221	-0.0569923	Cluster.3
6.14167	0.555289	0.106586	-0.0317973	Cluster.3
6.14167	0.560759	0.105194	-0.0316221	Cluster.3
6.14167	0.545883	0.100692	-0.0441633	Cluster.3
6.14167	0.55998	0.0969694	-0.0445435	Cluster.3
6.12708	0.531873	0.084722	-0.0670931	Cluster.3
6.12708	0.526557	0.100855	-0.0464277	Cluster.3
6.12708	0.534499	0.0816264	-0.0706574	Cluster.3
6.12708	0.53362	0.0811134	-0.0719333	Cluster.3
6.12708	0.548806	0.0872468	-0.0561034	Cluster.3
5.9875	0.55898	0.0755747	-0.0684005	Cluster.3
5.9875	0.55103	0.0775752	-0.0692167	Cluster.3
5.9875	0.540737	0.0874315	-0.0601295	Cluster.3
5.9875	0.542355	0.0711209	-0.0821802	Cluster.3
5.9875	0.550949	0.0784711	-0.0671932	Cluster.3
5.69583	0.553299	0.0718785	-0.0709737	Cluster.3
5.69583	0.555348	0.0742157	-0.069862	Cluster.3
5.69583	0.567195	0.0711028	-0.071179	Cluster.3
5.69583	0.559396	0.0770654	-0.0646444	Cluster.3
5.69583	0.557954	0.0798775	-0.0600761	Cluster.3
5.28125	0.566995	0.0613561	-0.0820815	Cluster.3
5.28125	0.57085	0.0594291	-0.0847661	Cluster.3
5.28125	0.575067	0.0430601	-0.107912	Cluster.3
5.28125	0.568632	0.0414402	-0.108942	Cluster.3
5.28125	0.578654	0.0486772	-0.0968573	Cluster.3
4.9625	0.576961	0.0641755	-0.0757539	Cluster.3
4.9625	0.575475	0.064748	-0.0765947	Cluster.3
4.9625	0.590158	0.0471279	-0.0976544	Cluster.3
4.9625	0.579004	0.0509073	-0.0933638	Cluster.3
4.9625	0.577837	0.053493	-0.0882361	Cluster.3
4.78333	0.585917	0.0535961	-0.0849352	Cluster.3
4.78333	0.59237	0.043328	-0.0959385	Cluster.3
4.78333	0.578235	0.0453275	-0.101059	Cluster.3
4.78333	0.57356	0.0635889	-0.0756857	Cluster.3
4.78333	0.593196	0.0409568	-0.0991906	Cluster.3
4.55	0.604094	0.0341631	-0.107775	Cluster.3
4.55	0.603969	0.034023	-0.107898	Cluster.3
4.55	0.607187	0.0320352	-0.109626	Cluster.3
4.55	0.600489	0.0346693	-0.105351	Cluster.3
4.55	0.597544	0.0354007	-0.103004	Cluster.3
4.2375	0.594491	0.0320314	-0.113549	Cluster.3
4.2375	0.610973	0.0289873	-0.112748	Cluster.3
4.2375	0.61531	0.0268928	-0.11464	Cluster.3
4.2375	0.60651	0.0344897	-0.105762	Cluster.3
4.2375	0.609982	0.0266638	-0.112403	Cluster.3
4.01875	0.611259	0.033392	-0.102468	Cluster.3
4.01875	0.620035	0.0291498	-0.108522	Cluster.3
4.01875	0.634618	0.0447129	-0.0803685	Cluster.3
4.01875	0.597182	0.0356244	-0.107469	Cluster.3
4.01875	0.596705	0.0343618	-0.107423	Cluster.3
3.87292	0.638549	0.0195701	-0.116261	Cluster.3
3.87292	0.625345	0.00908533	-0.133653	Cluster.3
3.87292	0.624148	0.020178	-0.120596	Cluster.3
3.87292	0.63749	0.0226901	-0.111369	Cluster.3
3.87292	0.63454	0.0201098	-0.112516	Cluster.3
